# Supplementary material for: Synthesis and reactivity of air stable Ni(ii) complexes with isocyanides and dialkyldithiophosphate ligands: acyclic diaminocarbene formation
Source: Royal Society of Chemistry journal article supplement (doi:10.1039/d4dt01915f), 2024-01-01
Supplement: d4dt01915f1.pdf [file d4dt01915f1.pdf]

# Synthesis and reactivity of air stable Ni(II) complexes with isocyanides and dialkyldithiophosphate ligands: acyclic diaminocarbene formation

*Lucía Álvarez-Miguel, ‡\*<sup>a</sup> Clara del Carmen-Rodríguez, †<sup>b</sup> María Valle,<sup>b</sup> Raúl García-Rodríguez,<sup>b</sup>*

*Celedonio M. Álvarez,<sup>b</sup> José M. Martín-Álvarez<sup>b</sup> and Daniel Miguel<sup>b</sup>.*

<sup>a</sup> Grupo SOSCATCOM, Departamento de Química Orgánica y Química Inorgánica, Facultad de Farmacia and Instituto de Investigación Química Andrés M. del Río (IQAR), Universidad de Alcalá, Alcalá de Henares, Madrid, Spain.

<sup>b</sup> GIR MIOMET-IU CINQUIMA/Química Inorgánica, Facultad de Ciencias Universidad de Valladolid, 47011 Valladolid (Spain).

## Supplementary Information

**Page S1-S2:** General synthesis and optimization of the one-pot reaction conditions for complexes **3b-3f**.

**Page S3:** <sup>31</sup>P{<sup>1</sup>H} NMR spectra monitoring of the reaction evolution of *bis* carbene bridge **7**

**Pages S4-S62:** <sup>1</sup>H, <sup>13</sup>C {<sup>1</sup>H}, <sup>31</sup>P{<sup>1</sup>H} and bidimensional NMR spectra for neutral and cationic (carbene)complexes **3b-3f**, **4a-4g**, **5a-5g**, **6a-6h** and **7**.

**Pages S63-S66:** X ray diffraction structures and crystallographic data of complexes **2e**, **3c**, **3d**, **3e**, **4a**, **4c**, **4e**, **4f**, **5b**, **5c**, **5e**, **6c**, **6e**, **6g**, **6h**, **7** and **8**.

## General protocol for the synthesis of $[\text{Ni}\{\text{S}_2\text{P}(\text{OR}^1)_2\}_2(\text{CNXyl})_2]$ , **3a-3f**

### One-pot preparation of $[\text{Ni}\{\text{S}_2\text{P}(\text{OR})_2\}_2]$ , **1-R**.<sup>[1]</sup>

$\text{P}_4\text{S}_{10}$  (0.224 g, 0.5 mmol) was dissolved in the alcohol (MeOH, EtOH, *i*PrOH, BzOH; 15 mL, excess) with magnetic stirring under  $\text{N}_2$  in a round bottom flask equipped with a bubbler to purge the formed  $\text{H}_2\text{S}$  gas. Once the gas production had subsided, the solvent was evaporated under reduced pressure to *ca.* 80% volume to purge the dissolved  $\text{H}_2\text{S}$  gas.  $\text{NiCl}_2 \cdot 6\text{H}_2\text{O}$  (0.238 g, 1 mmol) was added, and the mixture was stirred vigorously to afford a purple solution which was filtered and concentrated under reduced pressure. Addition of hexane produced the precipitation of **1** as purple microcrystals which were recrystallised from  $\text{CH}_2\text{Cl}_2$ /hexane. **1-Me** Yield: 0.345 g, 92 %.  $^{31}\text{P}\{^1\text{H}\}$  NMR ( $\text{CDCl}_3$ , 162 MHz):  $\delta$  97.95 ppm. **1-Et** Yield: 0.405 g, 94 %.  $^{31}\text{P}\{^1\text{H}\}$  NMR ( $\text{CDCl}_3$ , 162 MHz):  $\delta$  92.66 ppm. **1-*i*Pr** Yield: 0.457 g, 94 %.  $^{31}\text{P}\{^1\text{H}\}$  NMR ( $\text{CDCl}_3$ , 162 MHz):  $\delta$  89.27 ppm **1-Cy** Yield: 0.595 g, 92%.  $^{31}\text{P}\{^1\text{H}\}$  NMR ( $\text{CDCl}_3$ , 162 MHz):  $\delta$  88.46 ppm. **1-Bz** Yield: 0.635 g, 94%.  $^{31}\text{P}\{^1\text{H}\}$  NMR ( $\text{CDCl}_3$ , 162 MHz):  $\delta$  93.53 ppm.

### General synthesis of neutral diisocyanide alkylphosphate Ni(II) complexes (**3a-3f**).

To a solution of  $[\text{Ni}\{\text{S}_2\text{P}(\text{OR})_2\}_2]$  **1-R** (1 mmol) in dichloromethane (15 mL) was added  $\text{CNXyl}$  (0.266g, 2 mmol) or  $\text{CNAr}$  (0.374g, 2 mmol), and the octahedral **2n** complex was immediately detected by IR monitoring. The reaction conditions are detailed for each case (see below). The solvent was then evaporated in vacuo. The residue was washed with  $\text{Et}_2\text{O}$  (3 x 15 mL). The solid residue was recrystallized from  $\text{CH}_2\text{Cl}_2$ /ether. Slow evaporation gave **3a**<sup>[2]</sup>-**3f** as orange microcrystals. Dialkyl-thoate byproducts have not been isolated but they have been detected by  $^1\text{H}$  and  $^{31}\text{P}\{^1\text{H}\}$  NMR experiments. The data is in agreement with the literature.<sup>[3]</sup>

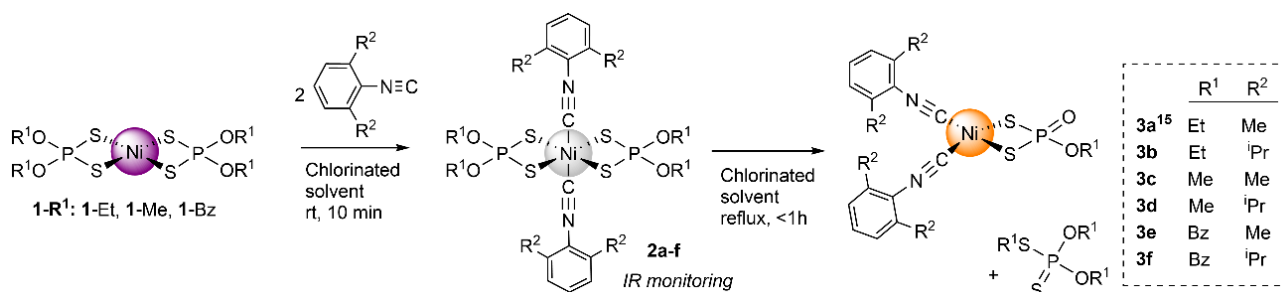

**Scheme S1.** Formation of neutral diisocyanide alkylthiophosphate nickel (II) complexes. The formation of complexes **3a-f** was followed by FT-IR.

**Table S1.** Conditions<sup>[a]</sup> and yields for the reaction of dialkyldithiophosphate Ni(II) and two equivalents of isocyanide (CNXyl).

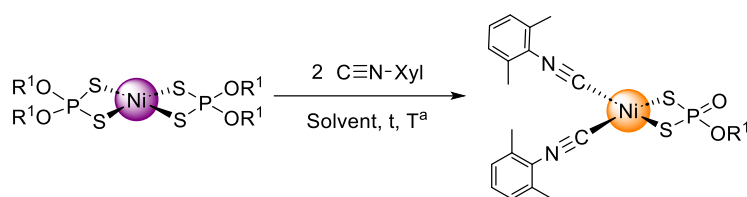

| Entry | Solvent                                       | R <sup>1</sup>                       | Temperature | Time <sup>[b]</sup> | Yield (%) <sup>[c]</sup> |
|-------|-----------------------------------------------|--------------------------------------|-------------|---------------------|--------------------------|
| 1     | MeOH                                          | Me                                   | rt          | 24h                 | 25                       |
| 2     | Toluene                                       | Me                                   | rt          | 24h                 | 15                       |
| 3     | THF                                           | Me                                   | rt          | 24h                 | 90                       |
| 4     | CH <sub>2</sub> Cl <sub>2</sub>               | Me                                   | rt          | 4h                  | 90                       |
| 5     | CH <sub>2</sub> Cl <sub>2</sub>               | Me                                   | reflux      | 30 min              | 95                       |
| 6     | CHCl <sub>3</sub>                             | Me                                   | reflux      | 40 min              | 95                       |
| 7     | CH <sub>2</sub> Cl <sub>2</sub>               | Me                                   | MW 90°C     | 5 min               | 95                       |
| 8     | C <sub>2</sub> H <sub>4</sub> Cl <sub>2</sub> | Et                                   | reflux      | 5 days              | 80                       |
| 9     | CH <sub>2</sub> Cl <sub>2</sub>               | Et                                   | MW 140°C    | 40 min.             | 90                       |
| 10    | CH <sub>2</sub> Cl <sub>2</sub>               | <sup>i</sup> Pr, Cy, <sup>t</sup> Bu | MW 140 °C   | 2 h                 | n. r.                    |

[a] General conditions:  $[\text{Ni}\{(\text{S}_2\text{POR})_2\}_2]$ , 0.15 mmol; CNXyl, 0.3 mmol; solvent 20 mL.

[b] FT-IR monitoring in solution.

[c] Isolated product.

$^{31}\text{P}\{^1\text{H}\}$  NMR spectra monitoring of the reaction evolution of *bis* carbene bridge 7

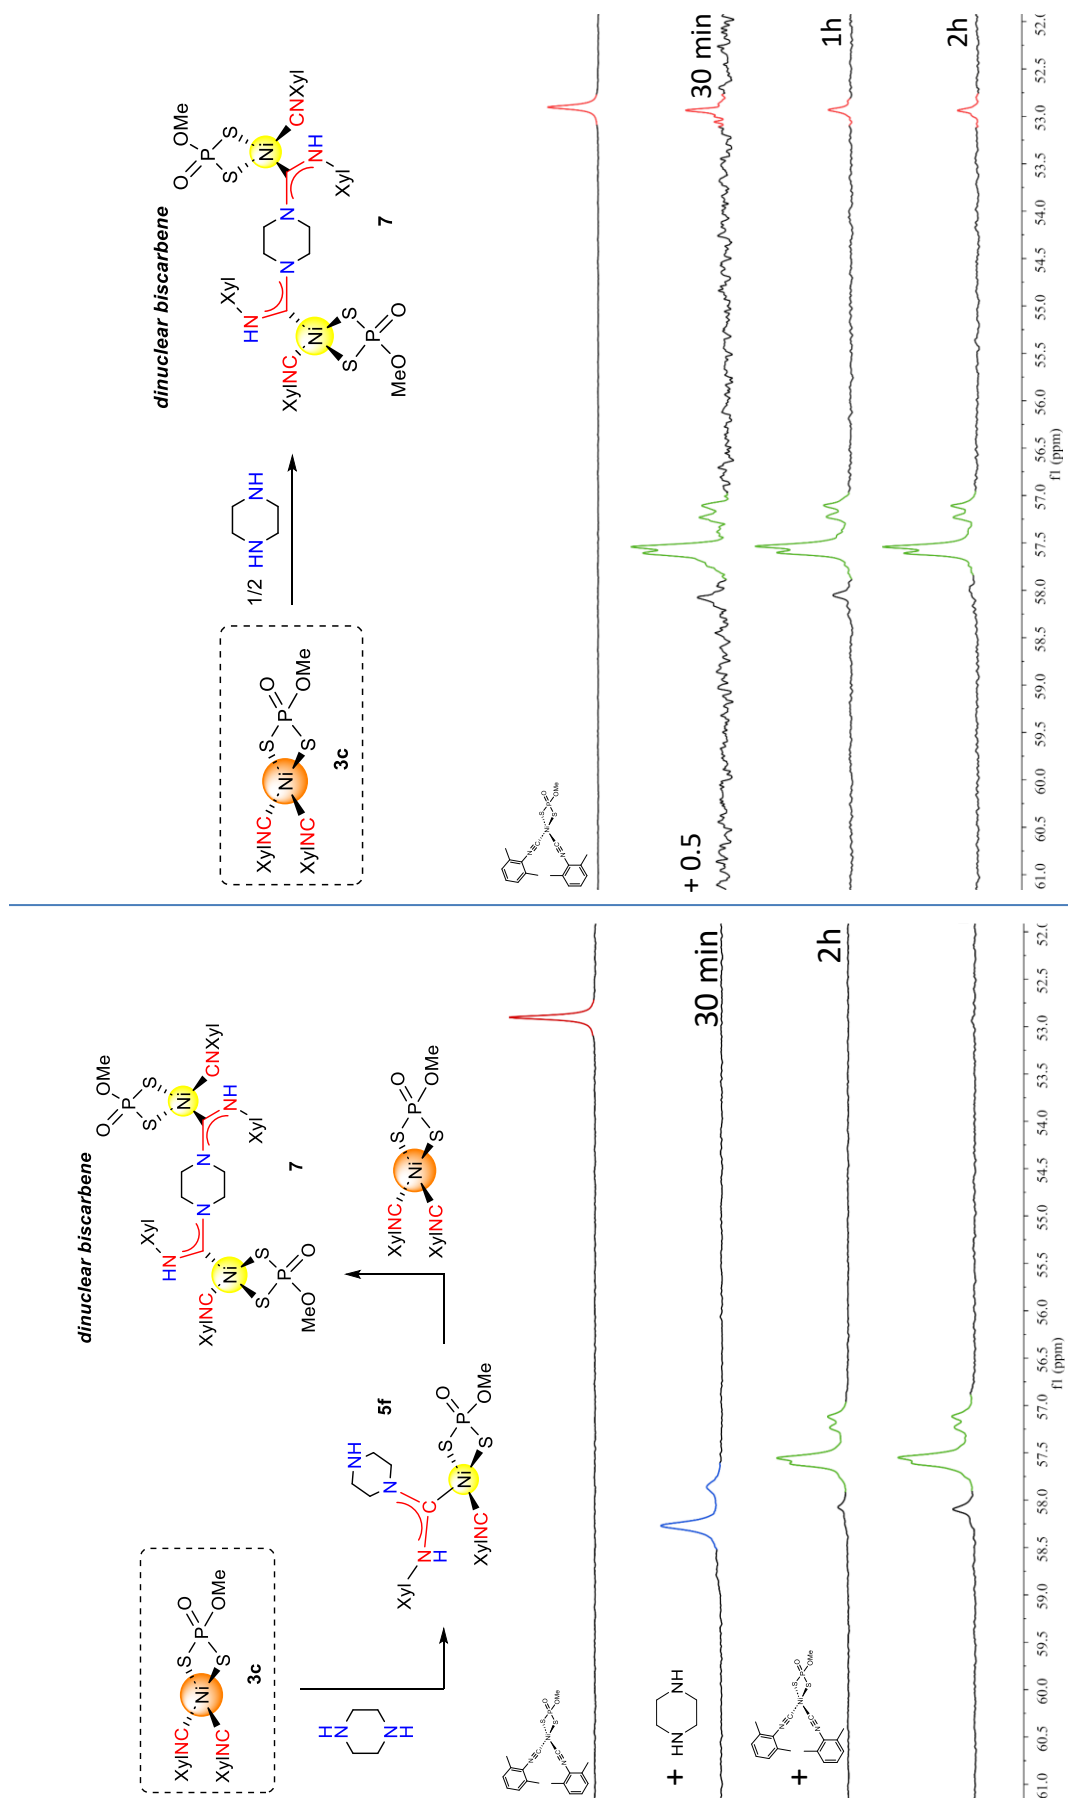

$^1\text{H}$ ,  $^{13}\text{C}$   $\{^1\text{H}\}$ ,  $^{31}\text{P}\{^1\text{H}\}$  and bidimensional NMR spectra for neutral and cationic (carbene) complexes 3b-3f, 4a-4g, 5a-5g, 6a-6h and 7.

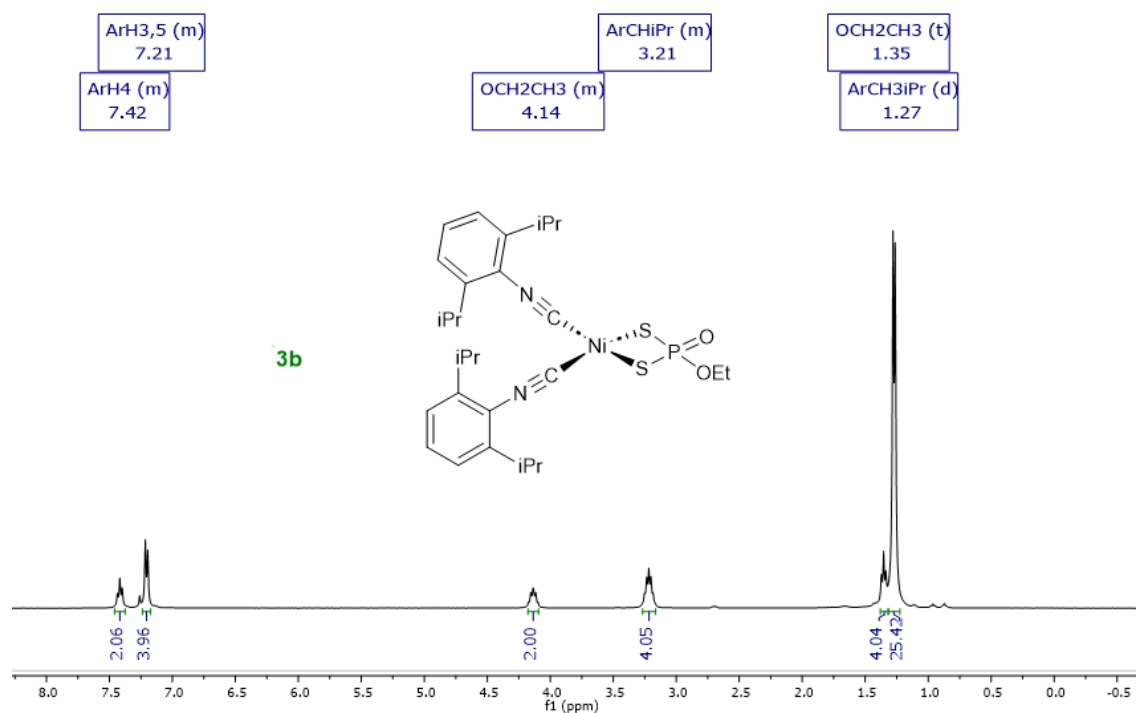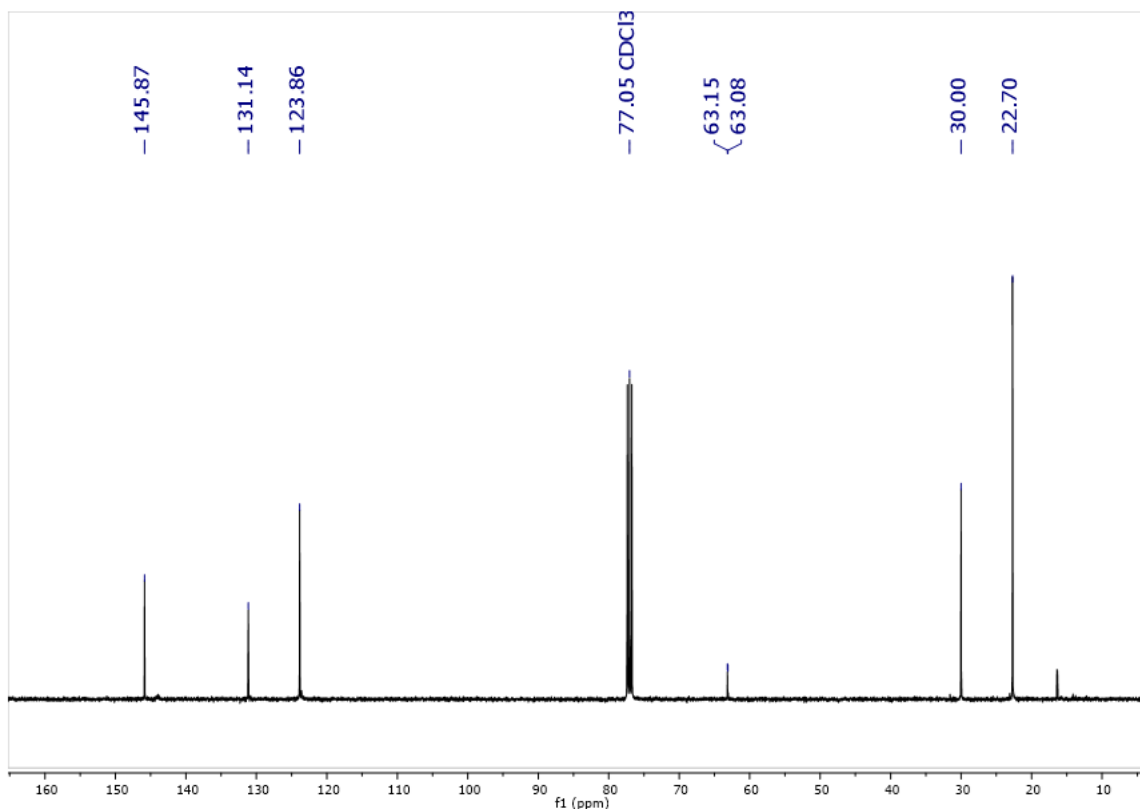

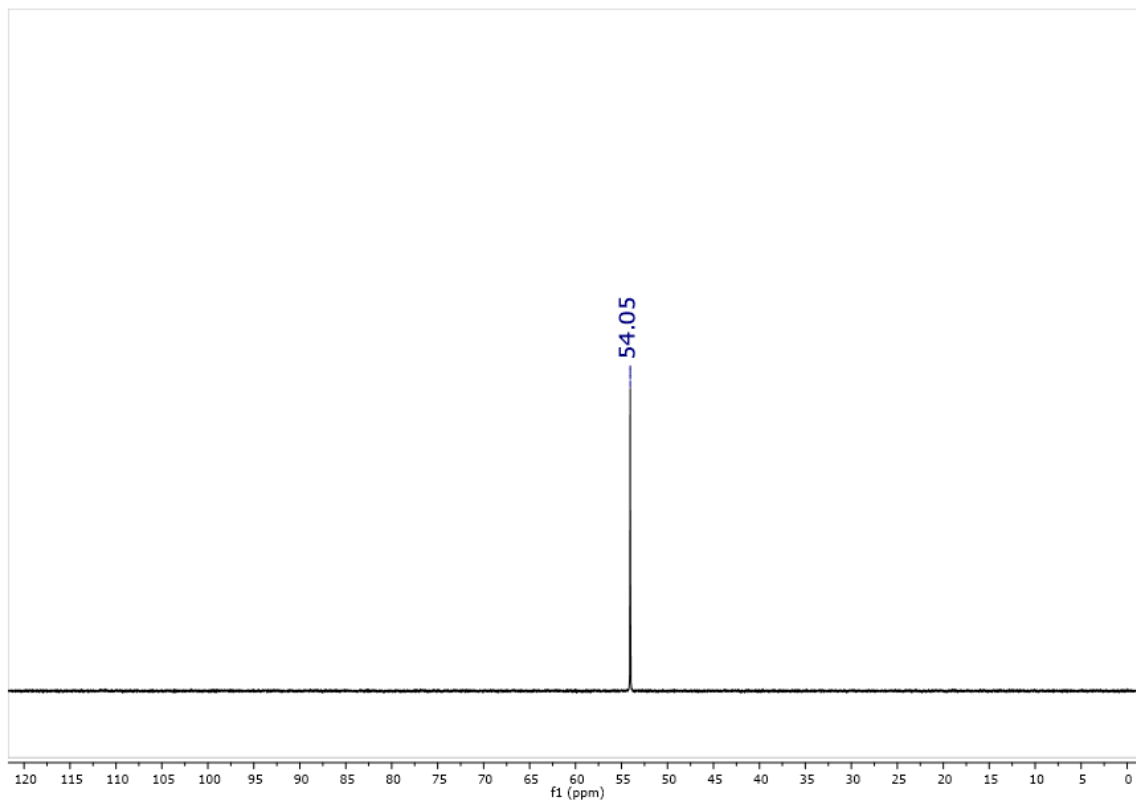

Figure S3.  $^{31}\text{P}\{^1\text{H}\}$  NMR ( $\text{CDCl}_3$ ) of compound 3b,  $[\text{Ni}\{\text{S}_2\text{P}(\text{O})(\text{OEt})\}(\text{CNAr})_2]$ .

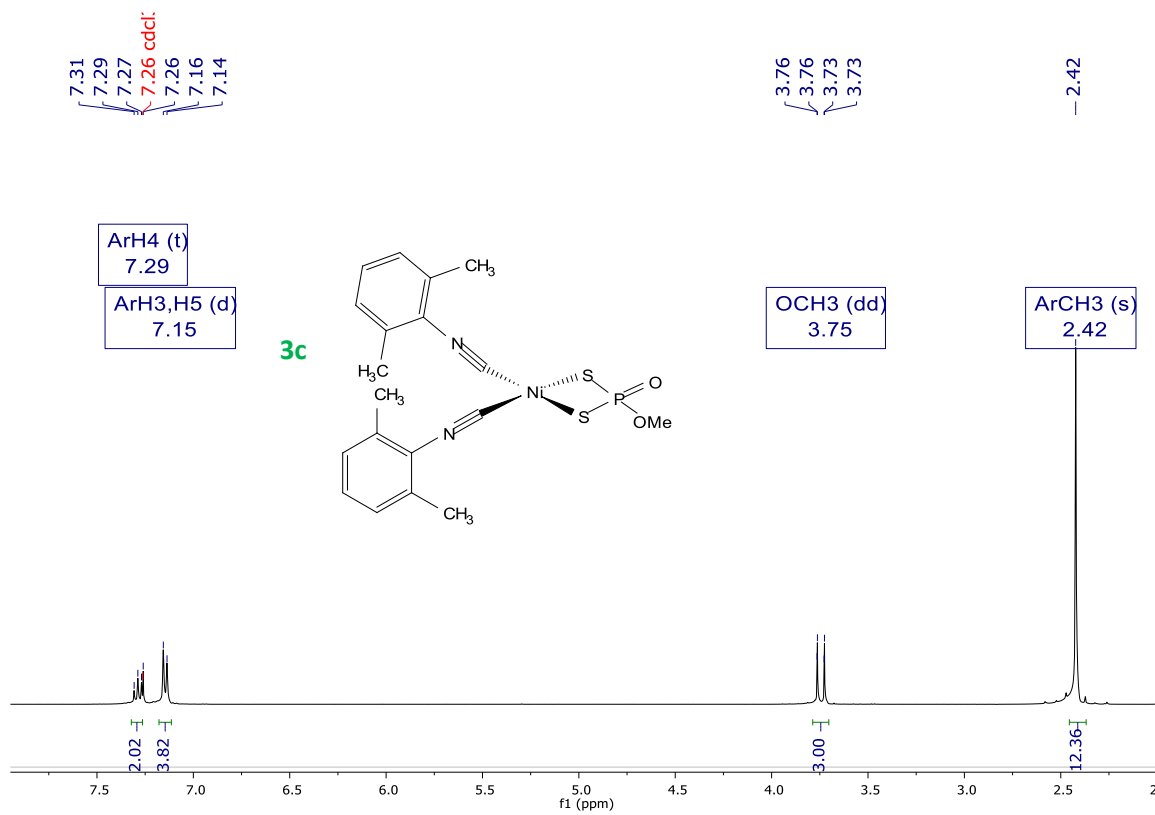

Figure S4.  $^1\text{H}$  NMR ( $\text{CDCl}_3$ ) of compound 3c,  $[\text{Ni}\{\text{S}_2\text{P}(\text{O})(\text{OMe})\}(\text{CNXyl})_2]$ .

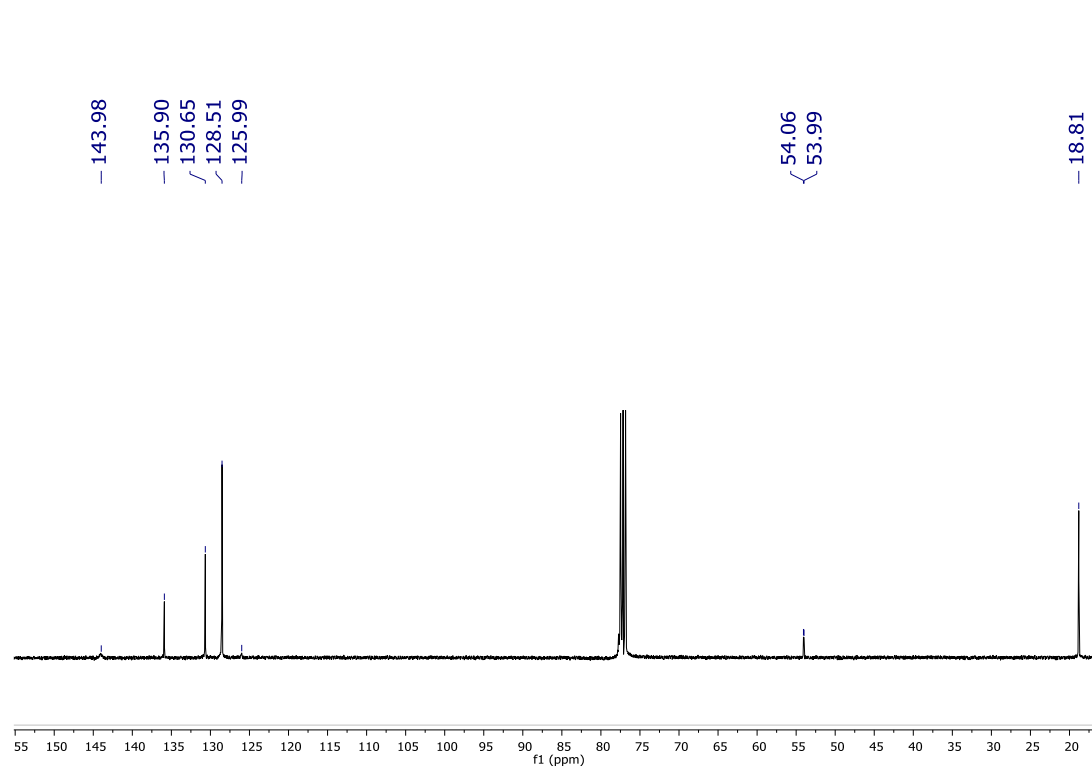

Figure S5.  $^{13}\text{C}\{^1\text{H}\}$  NMR ( $\text{CDCl}_3$ ) of compound 3c,  $[\text{Ni}\{\text{S}_2\text{P}(\text{O})(\text{OMe})\}(\text{CNXyl})_2]$ .

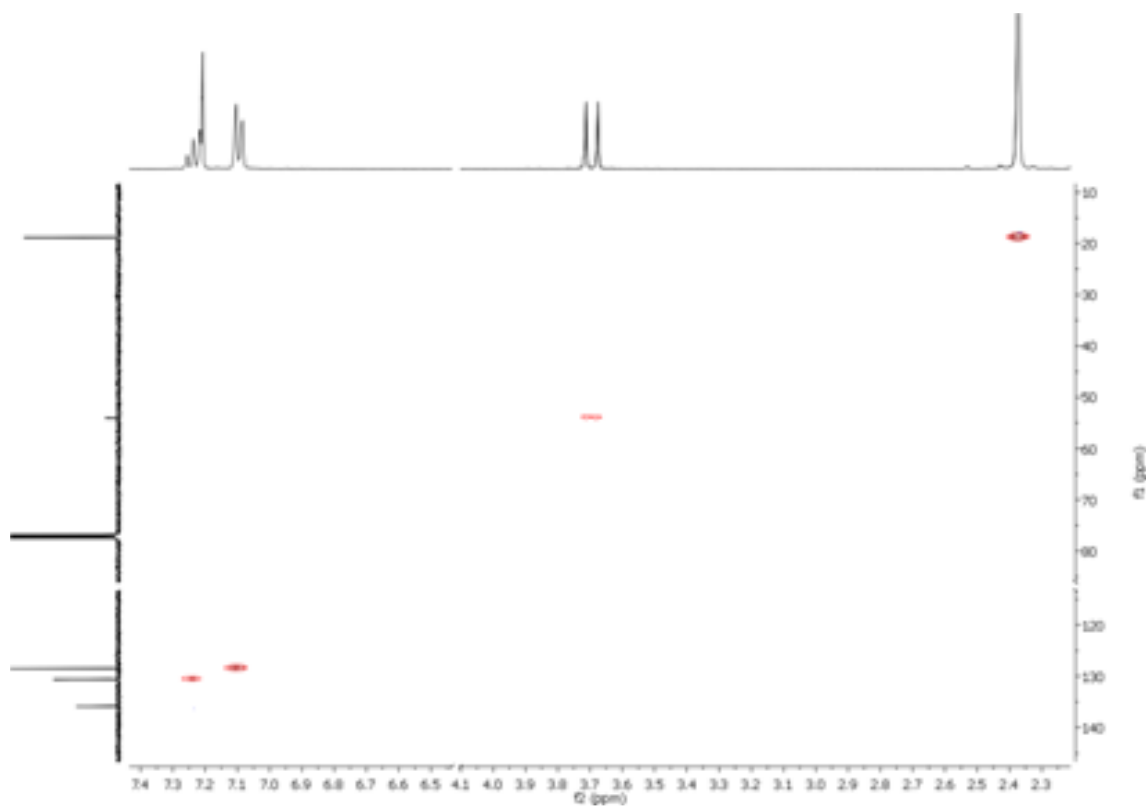

Figure S6.  $^1\text{H}\text{-}^{13}\text{C}\{^1\text{H}\}$  HSQC NMR ( $\text{CDCl}_3$ ) of compound 3c,  $[\text{Ni}\{\text{S}_2\text{P}(\text{O})(\text{OMe})\}(\text{CNXyl})_2]$ .

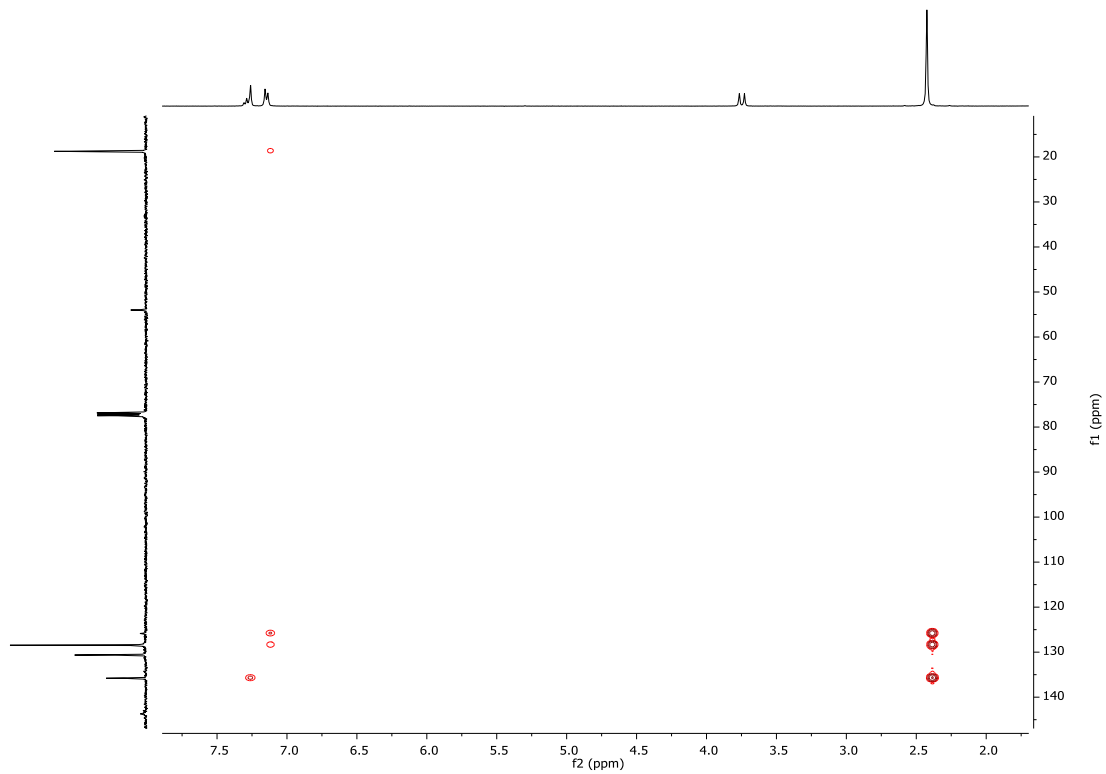

Figure S7.  $^1\text{H}$ - $^{13}\text{C}\{^1\text{H}\}$  HMBC NMR ( $\text{CDCl}_3$ ) of compound 3c,  $[\text{Ni}\{\text{S}_2\text{P}(\text{O})(\text{OMe})\}(\text{CNXyl})_2]$ .

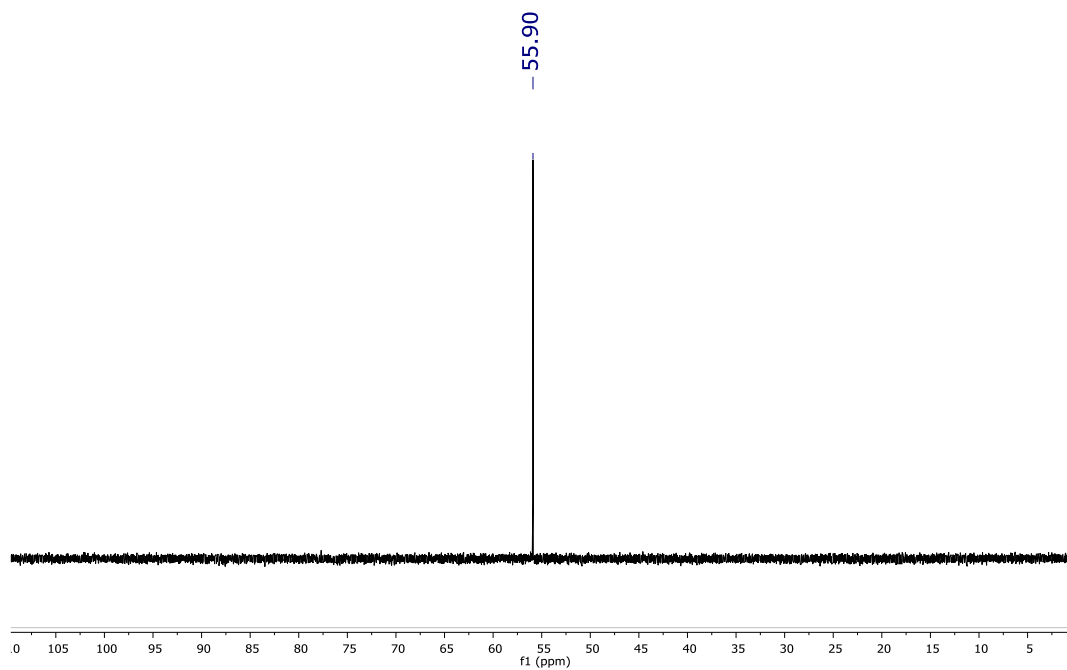

Figure S8.  $^{31}\text{P}\{^1\text{H}\}$  NMR ( $\text{CDCl}_3$ ) of compound 3c,  $[\text{Ni}\{\text{S}_2\text{P}(\text{O})(\text{OMe})\}(\text{CNXyl})_2]$ .



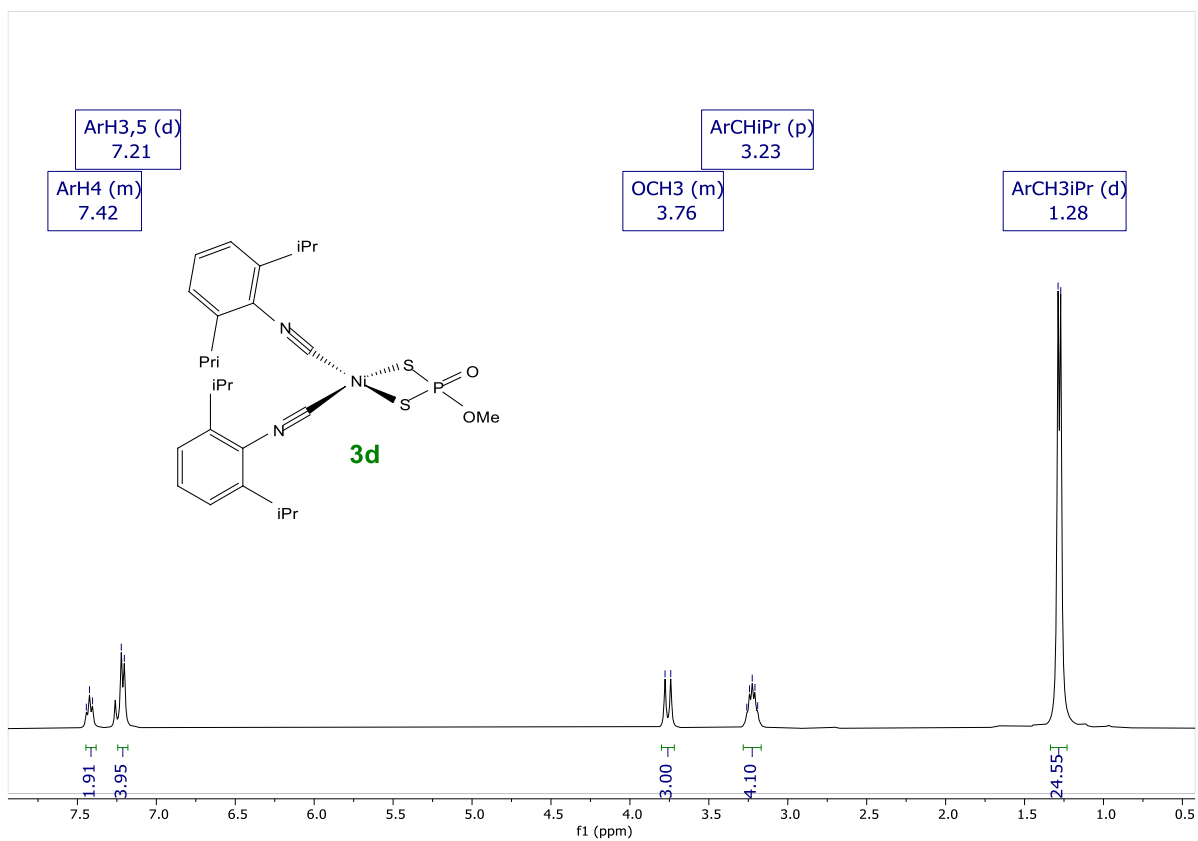

Figure S 9. <sup>1</sup>H NMR (CDCl<sub>3</sub>) of compound **3d**,  $[\text{Ni}\{\text{S}_2\text{P}(\text{O})(\text{OMe})\}(\text{CNAr})_2]$ .

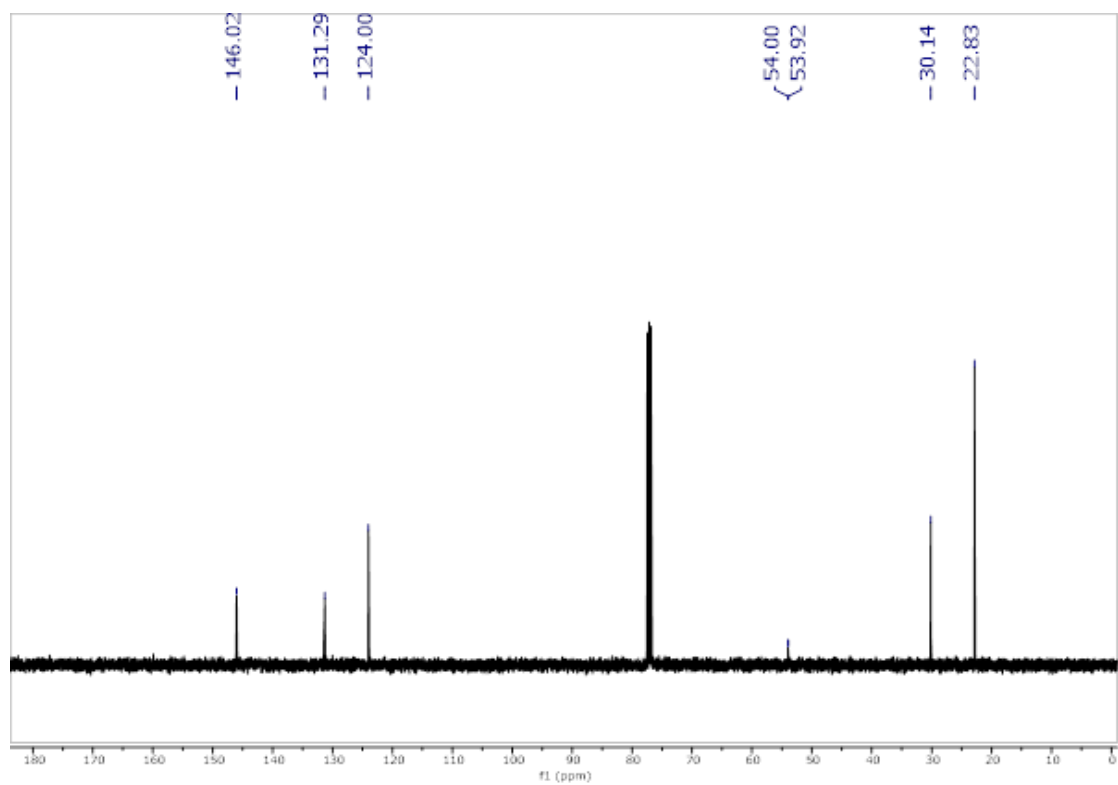

Figure S10. <sup>13</sup>C{<sup>1</sup>H} NMR (CDCl<sub>3</sub>) of compound **3d**,  $[\text{Ni}\{\text{S}_2\text{P}(\text{O})(\text{OMe})\}(\text{CNAr})_2]$ .

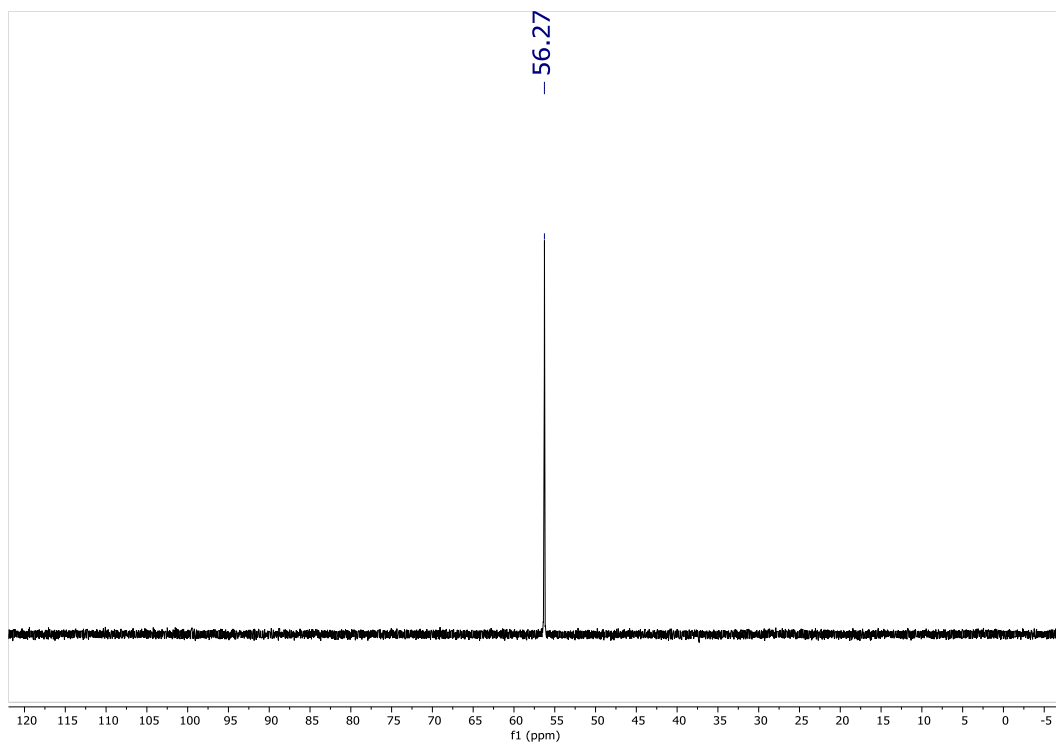

Figure S11.  $^{31}\text{P}\{^1\text{H}\}$  NMR ( $\text{CDCl}_3$ ) of compound 3d,  $[\text{Ni}\{\text{S}_2\text{P}(\text{O})(\text{OMe})\}(\text{CNAr})_2]$ .

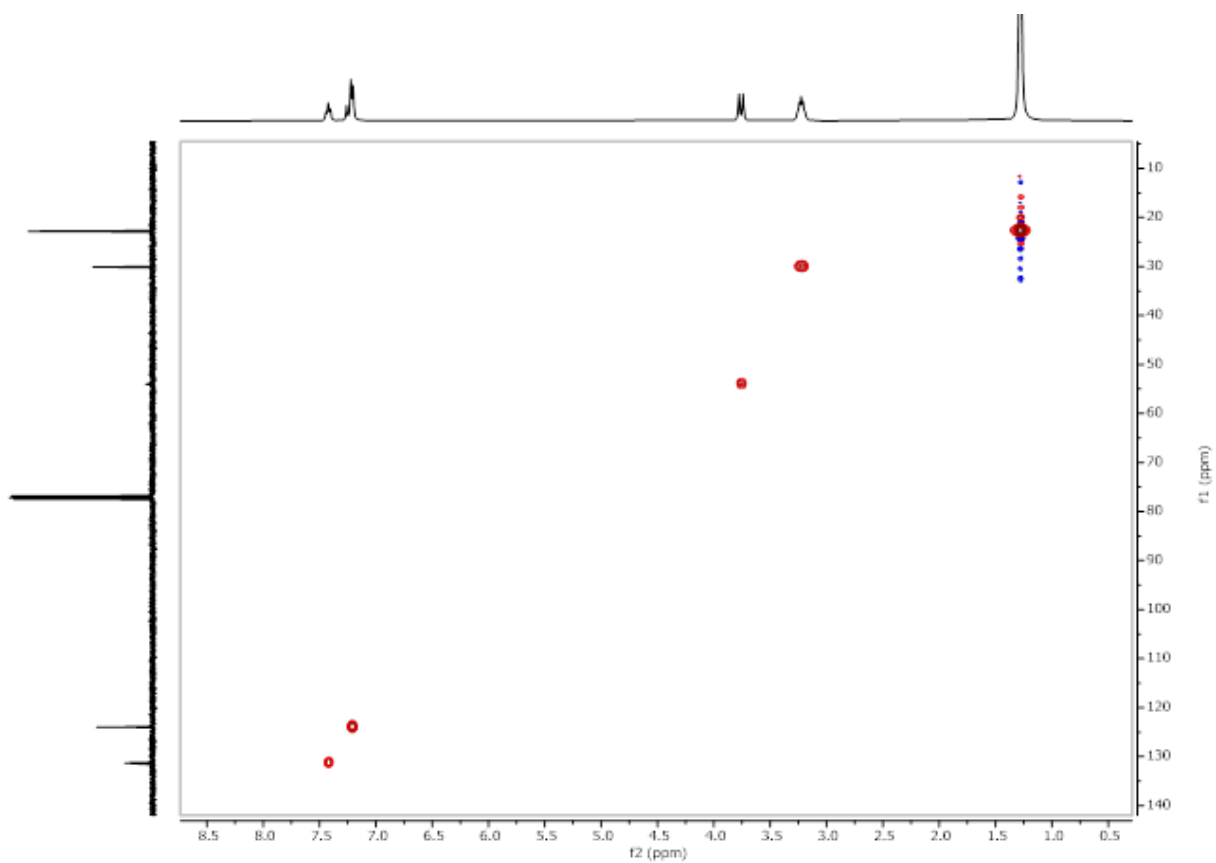

Figure S 12.  $^1\text{H}\text{-}^{13}\text{C}\{^1\text{H}\}$  HSQC ( $\text{CDCl}_3$ ) of compound 3d,  $[\text{Ni}\{\text{S}_2\text{P}(\text{O})(\text{OMe})\}(\text{CNAr})_2]$ .

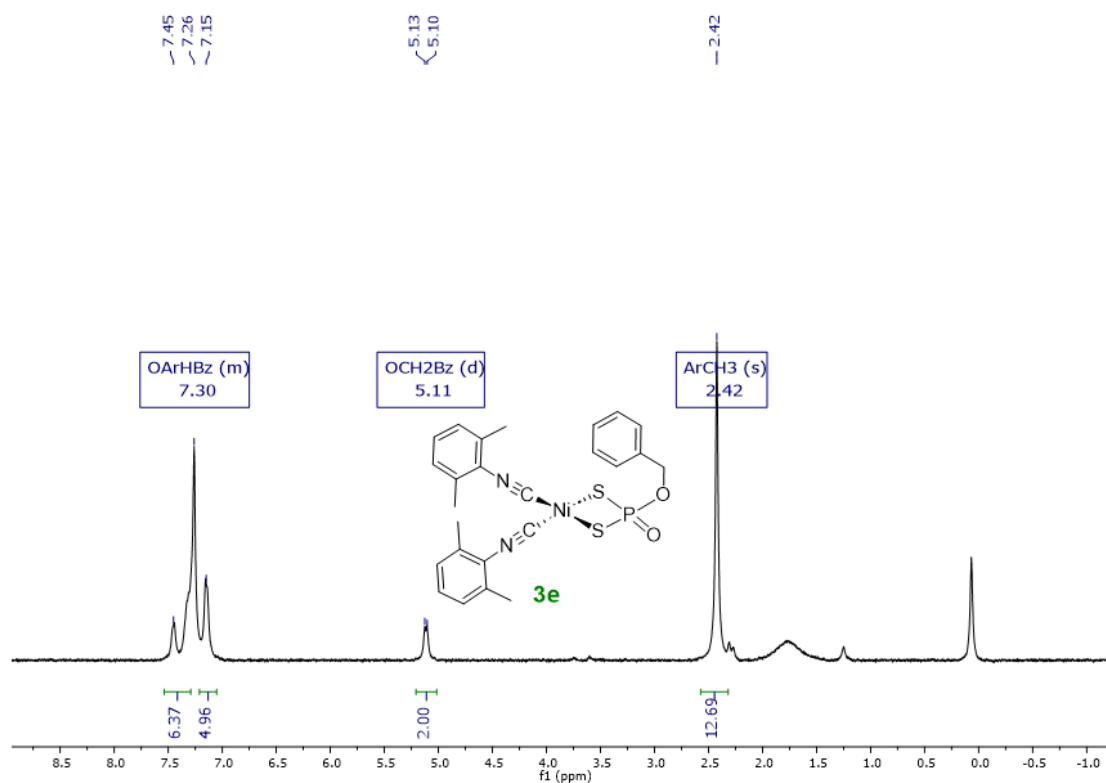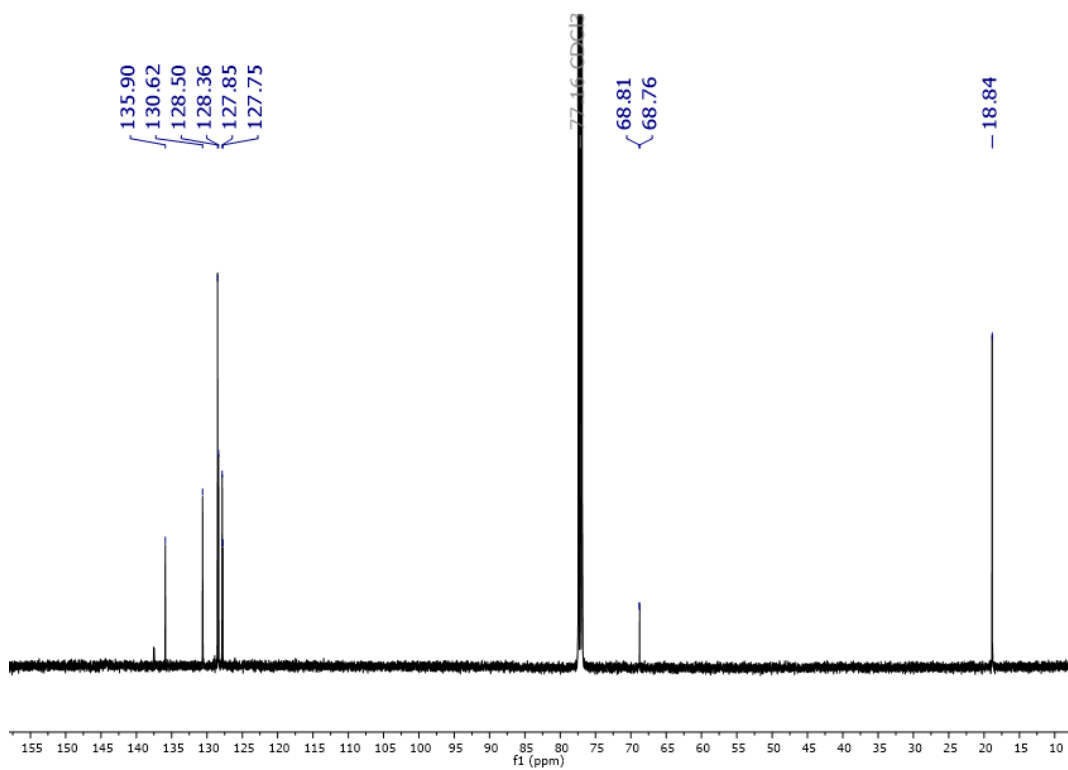

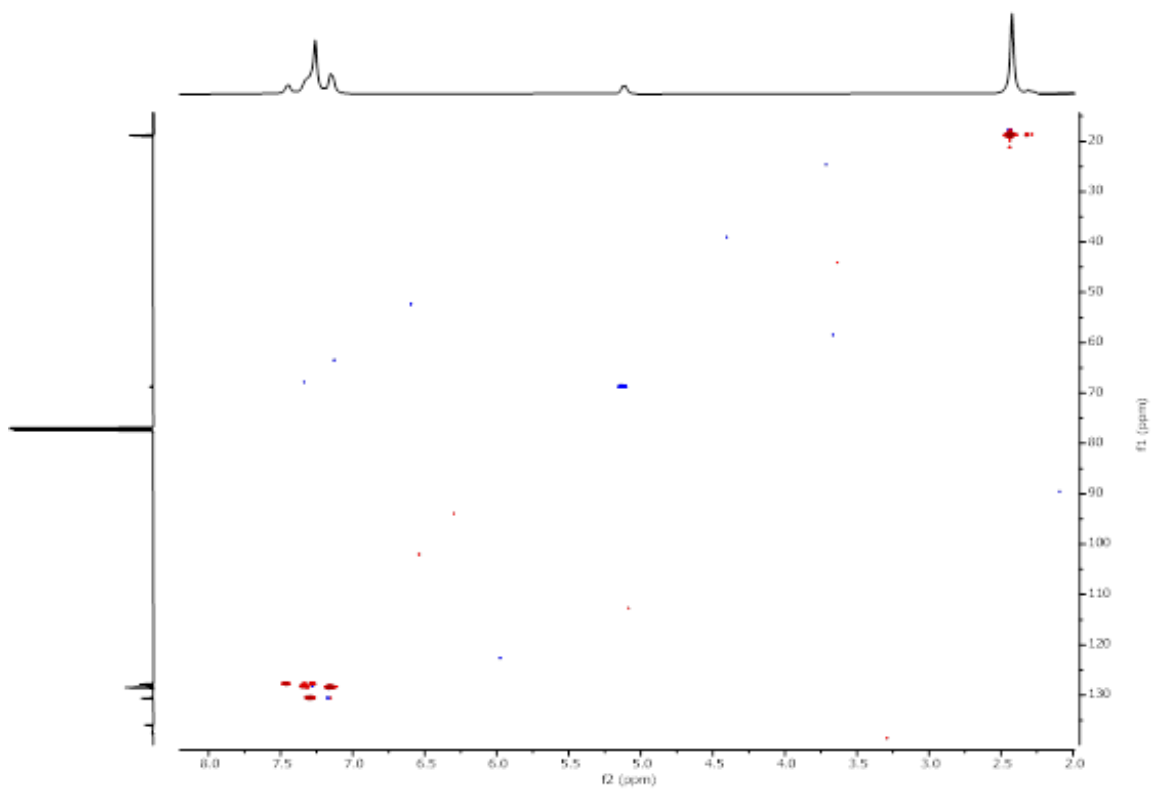

Figure S 15.  $^1\text{H}$ - $^{13}\text{C}\{^1\text{H}\}$  HSQC NMR ( $\text{CDCl}_3$ ) of compound 3e,  $[\text{Ni}\{\text{S}_2\text{P}(\text{O})(\text{OBz})\}\{\text{CNXyl}\}_2]$ .

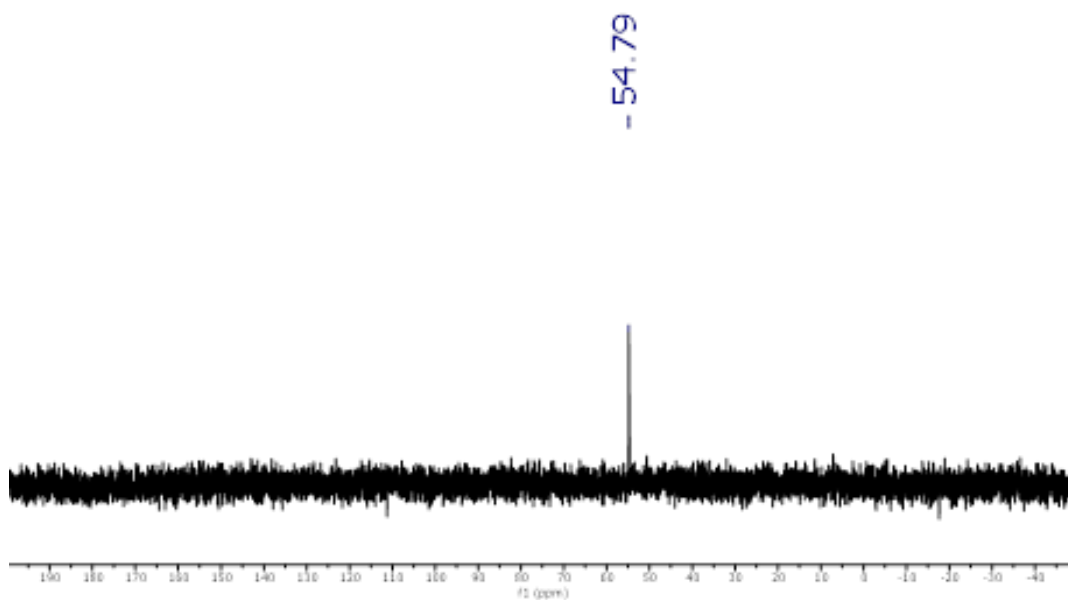

Figure S 16.  $^{31}\text{P}\{^1\text{H}\}$  NMR ( $\text{CDCl}_3$ ) of compound 3e,  $[\text{Ni}\{\text{S}_2\text{P}(\text{O})(\text{OBz})\}\{\text{CNXyl}\}_2]$ .

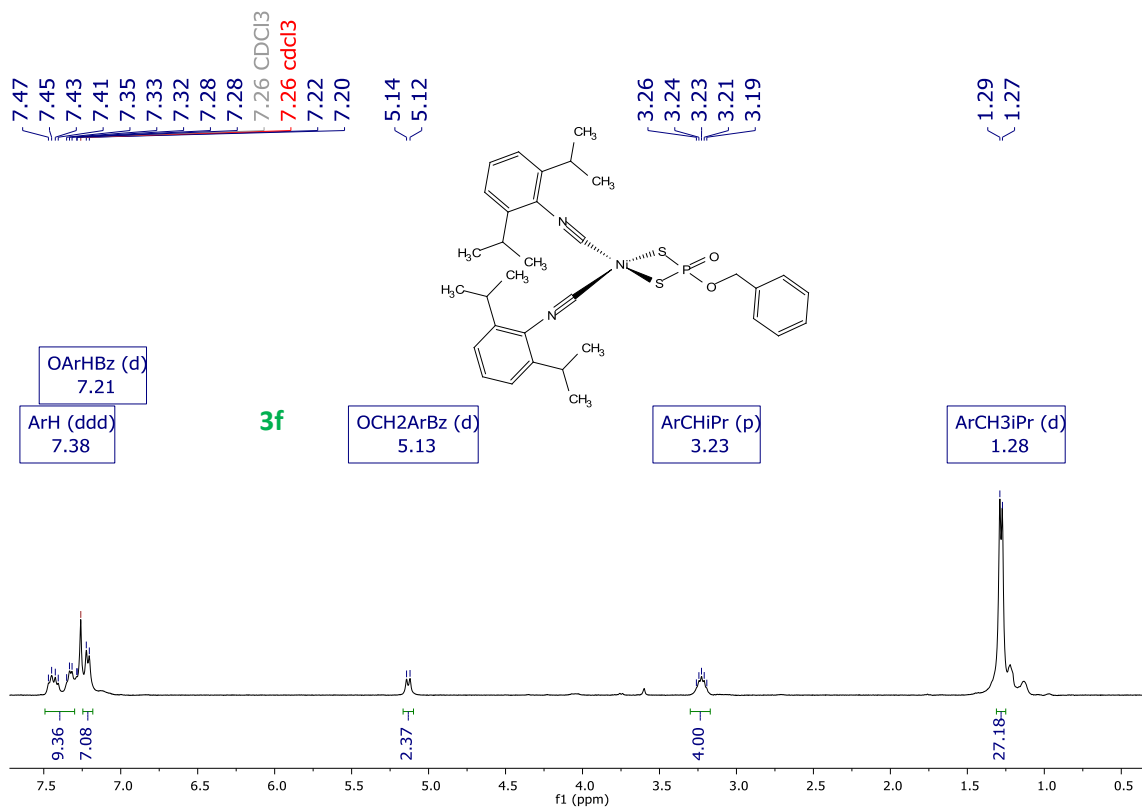

Figure S17.  $^1\text{H NMR}$  (CDCl<sub>3</sub>) of compound **3f**,  $[\text{Ni}\{\text{S}_2\text{P}(\text{O})(\text{OBz})\}(\text{CNAr})_2]$ .

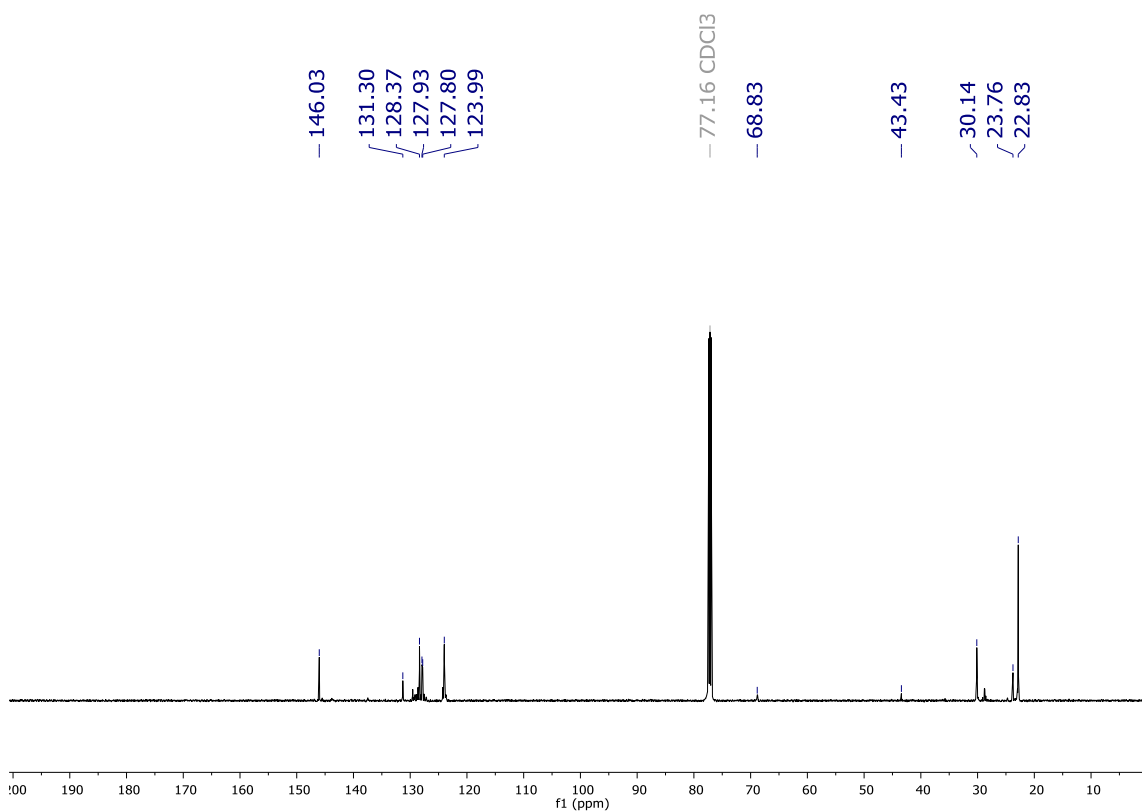

Figure S18.  $^{13}\text{C}\{^1\text{H}\}$  NMR (CDCl<sub>3</sub>) of compound **3f**,  $[\text{Ni}\{\text{S}_2\text{P}(\text{O})(\text{OBz})\}(\text{CNAr})_2]$ .

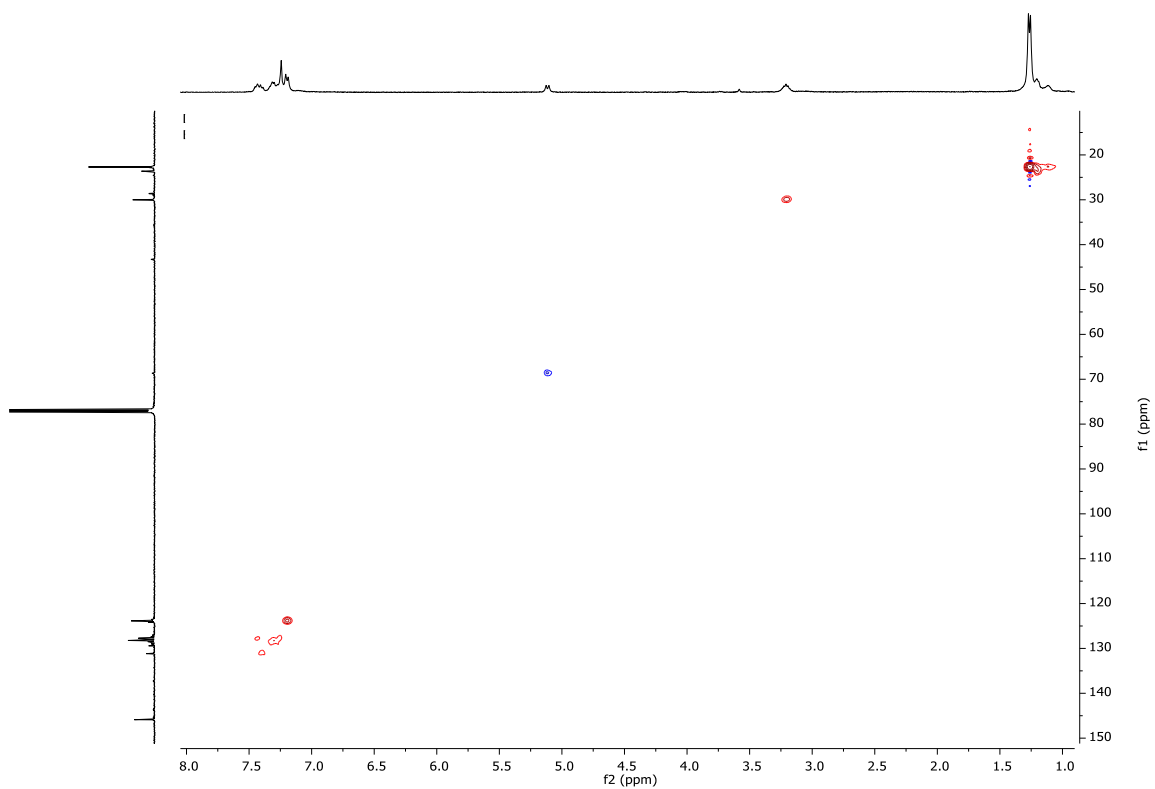

Figure S19.  $^1\text{H}$ - $^{13}\text{C}\{^1\text{H}\}$  HSQC NMR ( $\text{CDCl}_3$ ) of compound 3f,  $[\text{Ni}\{\text{S}_2\text{P}(\text{O})(\text{OBz})\}\{\text{CNAr}\}_2]$ .

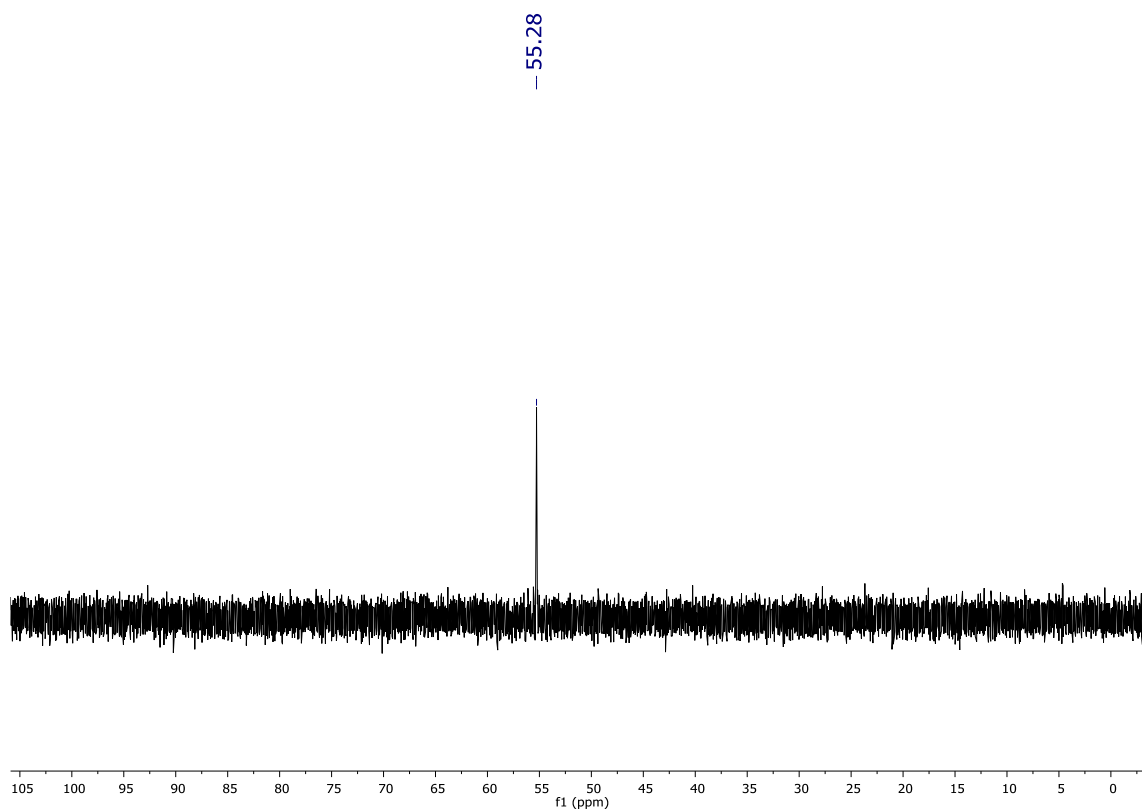

Figure S20.  $^{31}\text{P}\{^1\text{H}\}$  NMR ( $\text{CDCl}_3$ ) of compound 3f,  $[\text{Ni}\{\text{S}_2\text{P}(\text{O})(\text{OBz})\}\{\text{CNAr}\}_2]$ .

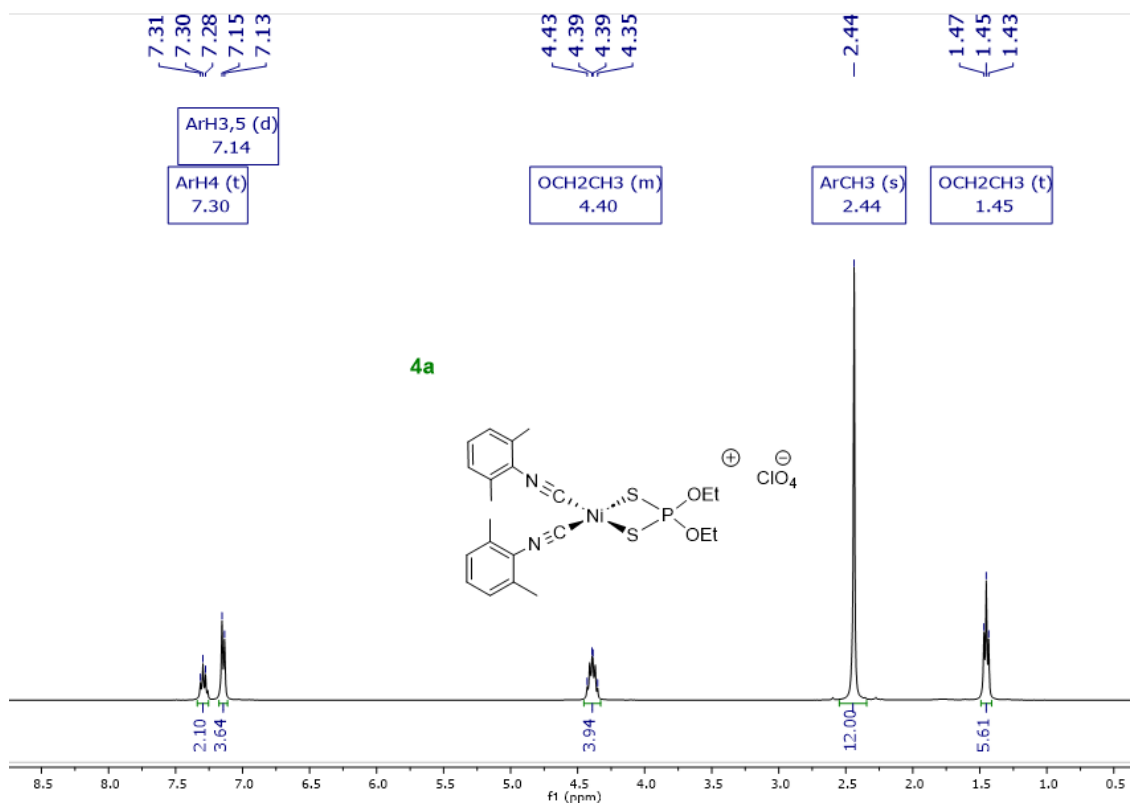

Figure S21.  $^1\text{H}$  NMR ( $\text{CDCl}_3$ ) of compound **4a**,  $[\text{Ni}\{\text{S}_2\text{P}(\text{OEt})_2\}(\text{CNXyl})_2]\text{ClO}_4$ .

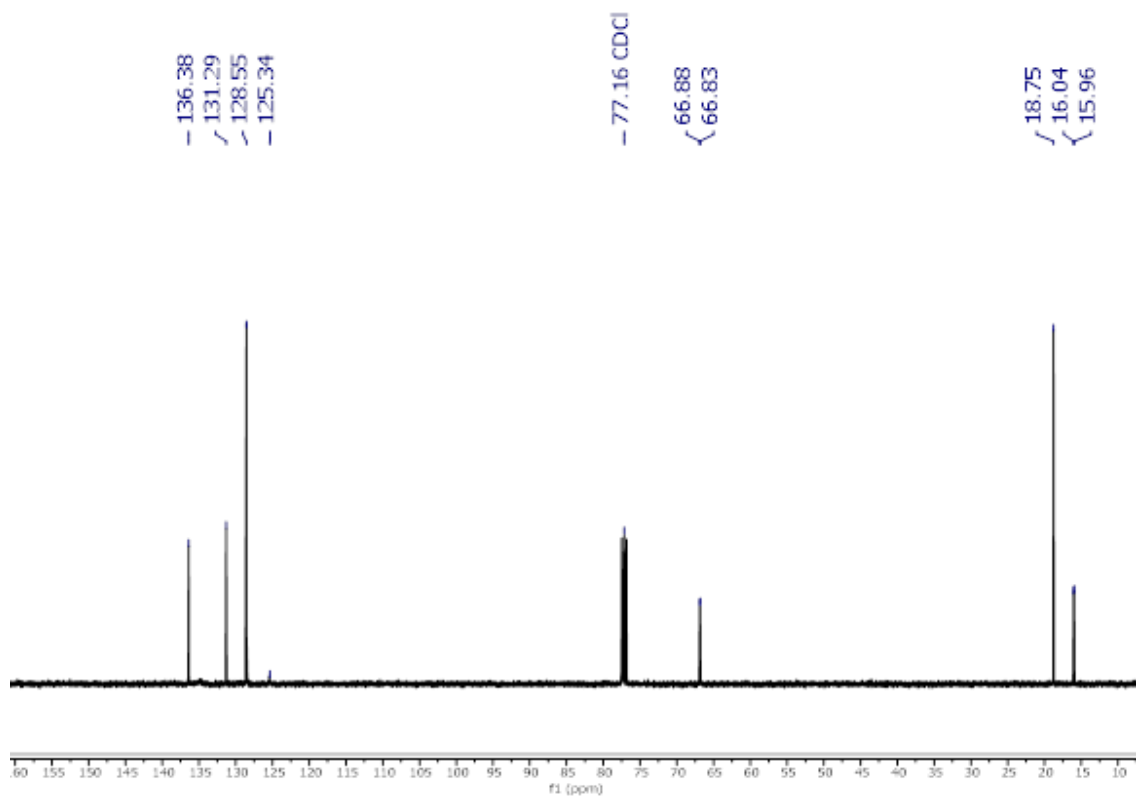

Figure S 22.  $^{13}\text{C}\{^1\text{H}\}$  NMR ( $\text{CDCl}_3$ ) of compound **4a**,  $[\text{Ni}\{\text{S}_2\text{P}(\text{OEt})_2\}(\text{CNXyl})_2]\text{ClO}_4$ .

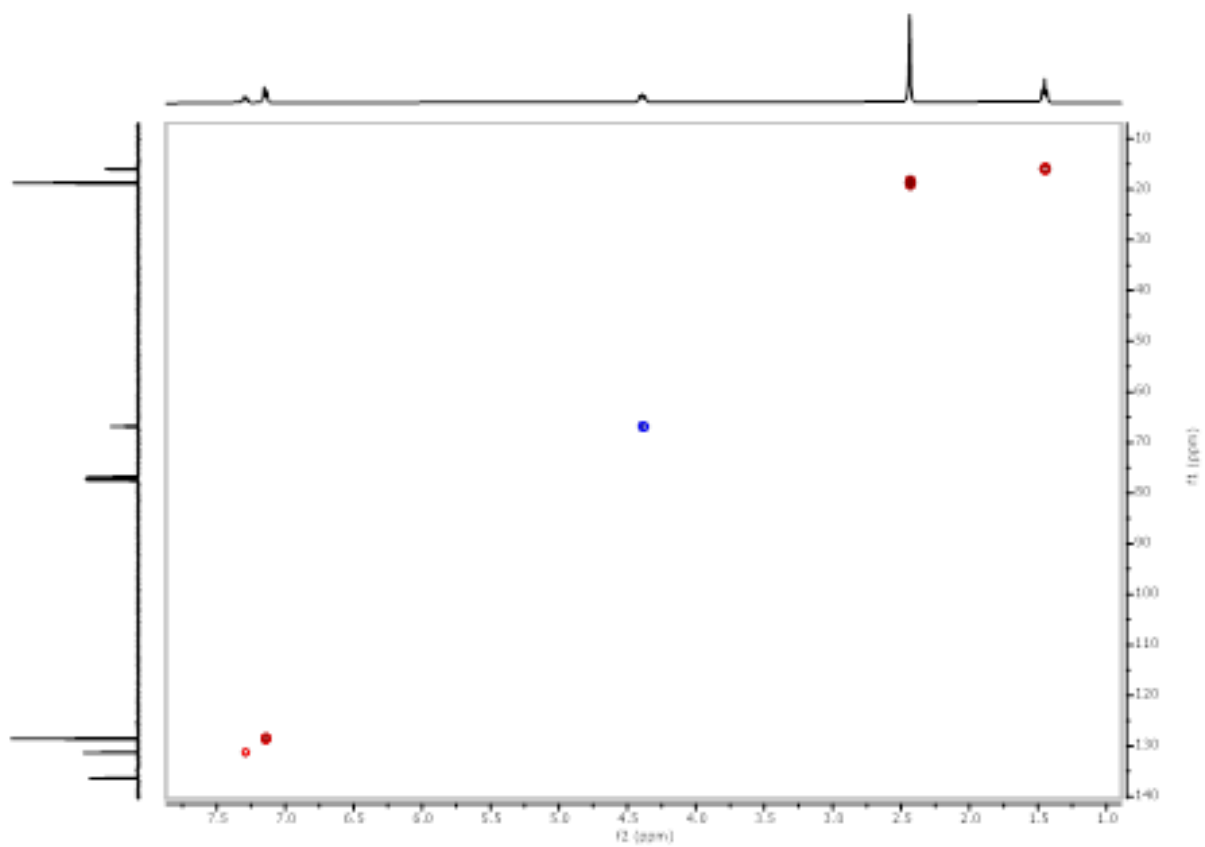

Figure S 23.  $^1\text{H}$ - $^{13}\text{C}\{^1\text{H}\}$  HSQC NMR ( $\text{CDCl}_3$ ) of compound 4a,  $[\text{Ni}\{\text{S}_2\text{P}(\text{OEt})_2\}(\text{CNXyl})_2]\text{ClO}_4$ .

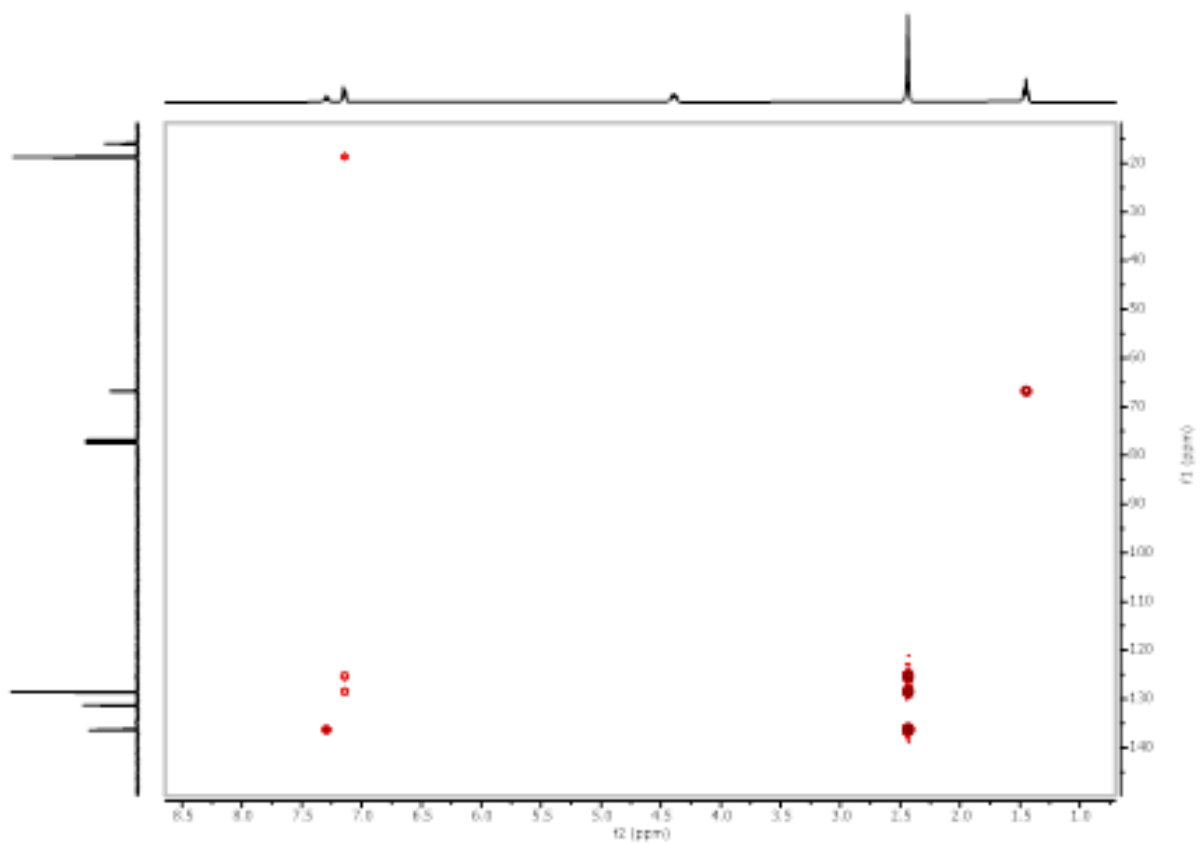

Figure S 24.  $^1\text{H}$ - $^{13}\text{C}\{^1\text{H}\}$  HMBC NMR ( $\text{CDCl}_3$ ) of compound 4a,  $[\text{Ni}\{\text{S}_2\text{P}(\text{OEt})_2\}(\text{CNXyl})_2]\text{ClO}_4$ .



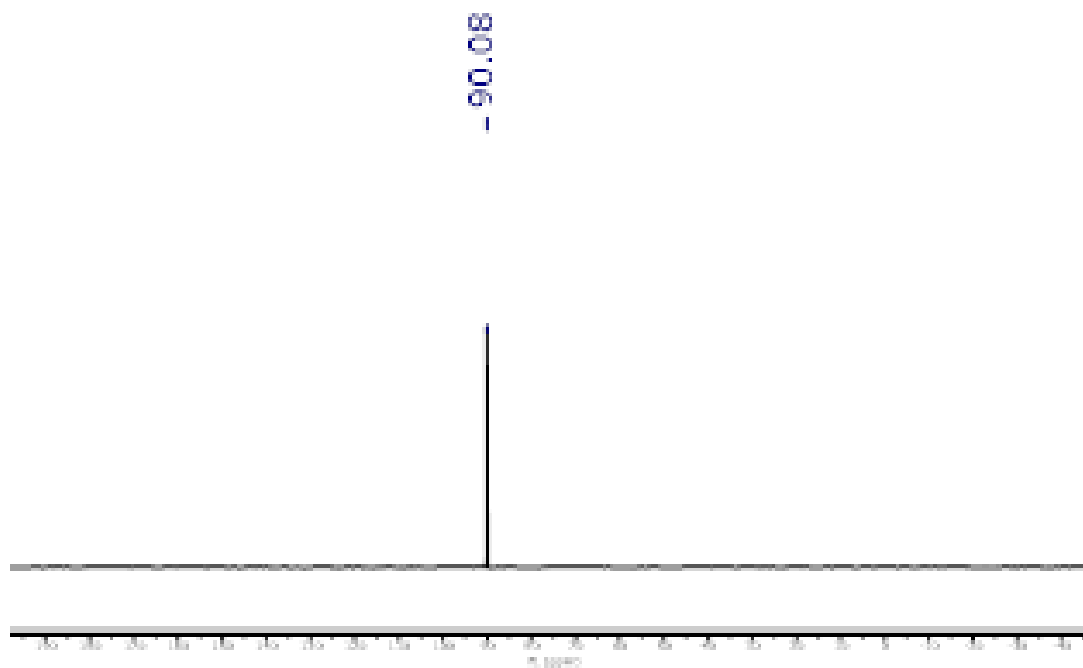

Figure S 25.  $^{31}\text{P}\{^1\text{H}\}$  NMR ( $\text{CDCl}_3$ ) of compound 4a,  $[\text{Ni}\{\text{S}_2\text{P}(\text{OEt})_2\}(\text{CNAr})_2]\text{ClO}_4$ .

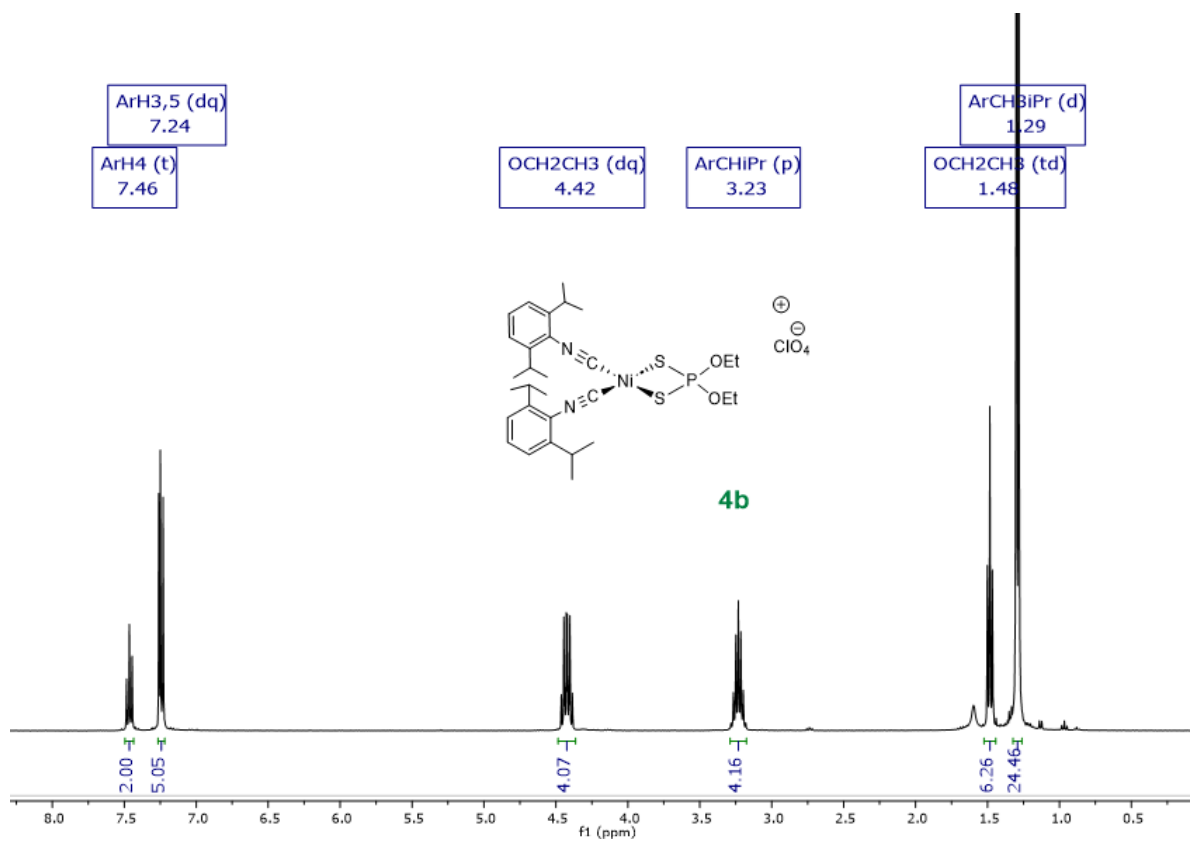

Figure S 26.  $^1\text{H}$  NMR ( $\text{CDCl}_3$ ) of compound 4b,  $[\text{Ni}\{\text{S}_2\text{P}(\text{OEt})_2\}(\text{CNAr})_2]\text{ClO}_4$ .

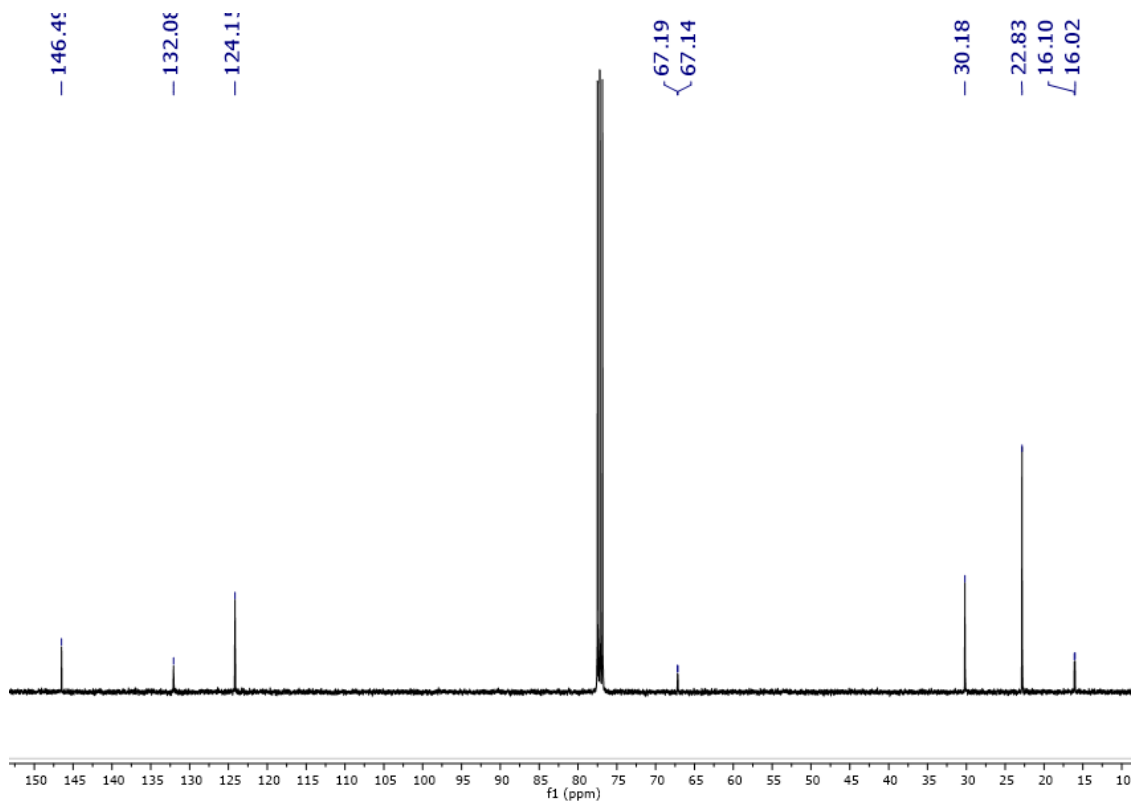

Figure S 27.  $^{13}\text{C}\{^1\text{H}\}$  NMR ( $\text{CDCl}_3$ ) of compound 4b,  $[\text{Ni}\{\text{S}_2\text{P}(\text{OEt})_2\}(\text{CNAr})_2]\text{ClO}_4$ .

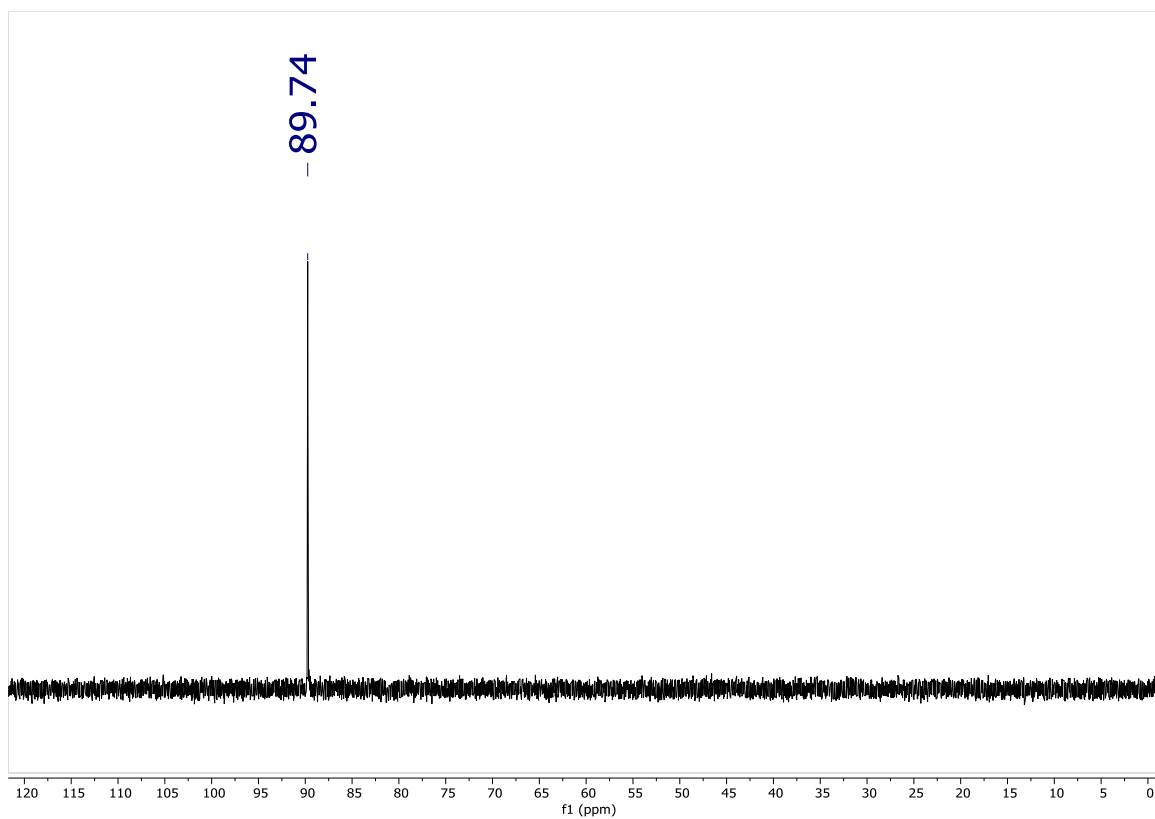

Figure S 28.  $^{31}\text{P}\{^1\text{H}\}$  NMR ( $\text{CDCl}_3$ ) of compound 4b,  $[\text{Ni}\{\text{S}_2\text{P}(\text{OEt})_2\}(\text{CNAr})_2]\text{ClO}_4$ .

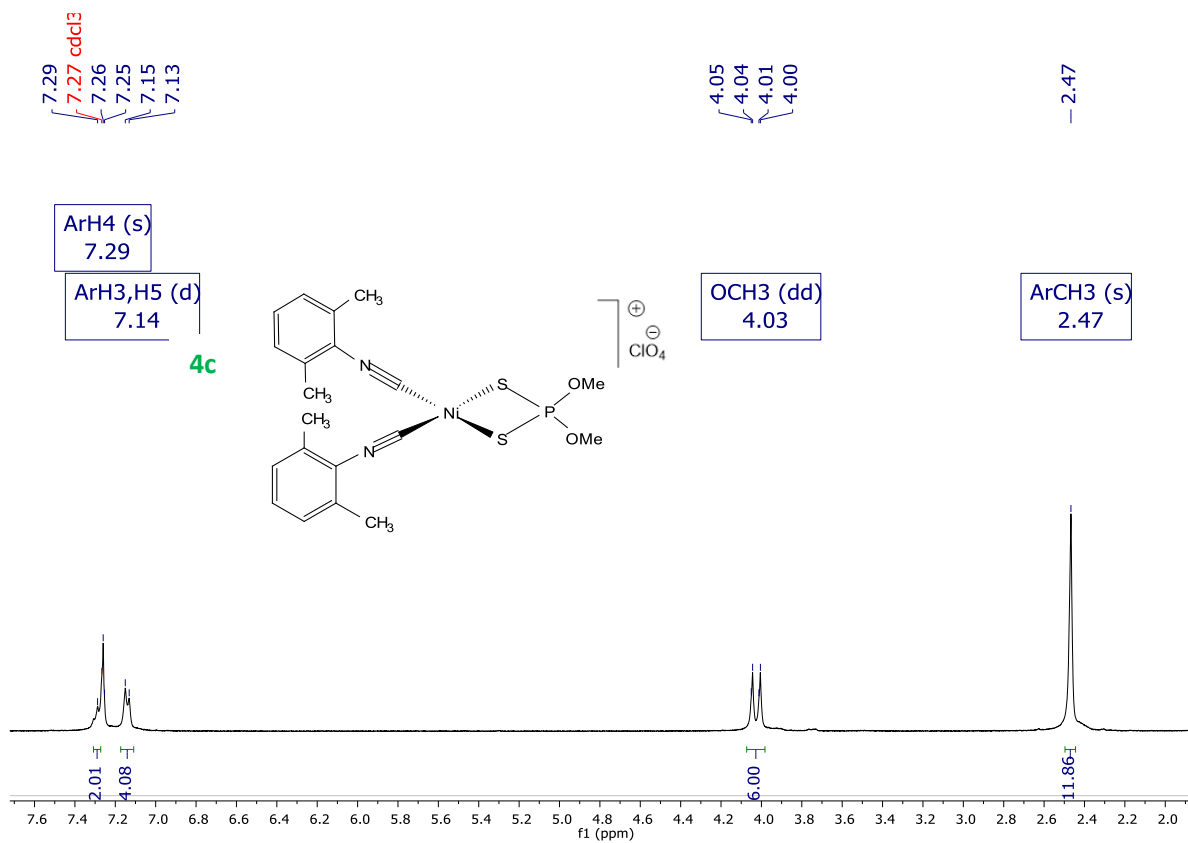

Figure S29.  $^1\text{H}$  NMR ( $\text{CDCl}_3$ ) of compound **4c**,  $[\text{Ni}\{\text{S}_2\text{P}(\text{OMe})_2\}(\text{CNXyl})_2]\text{ClO}_4$ .

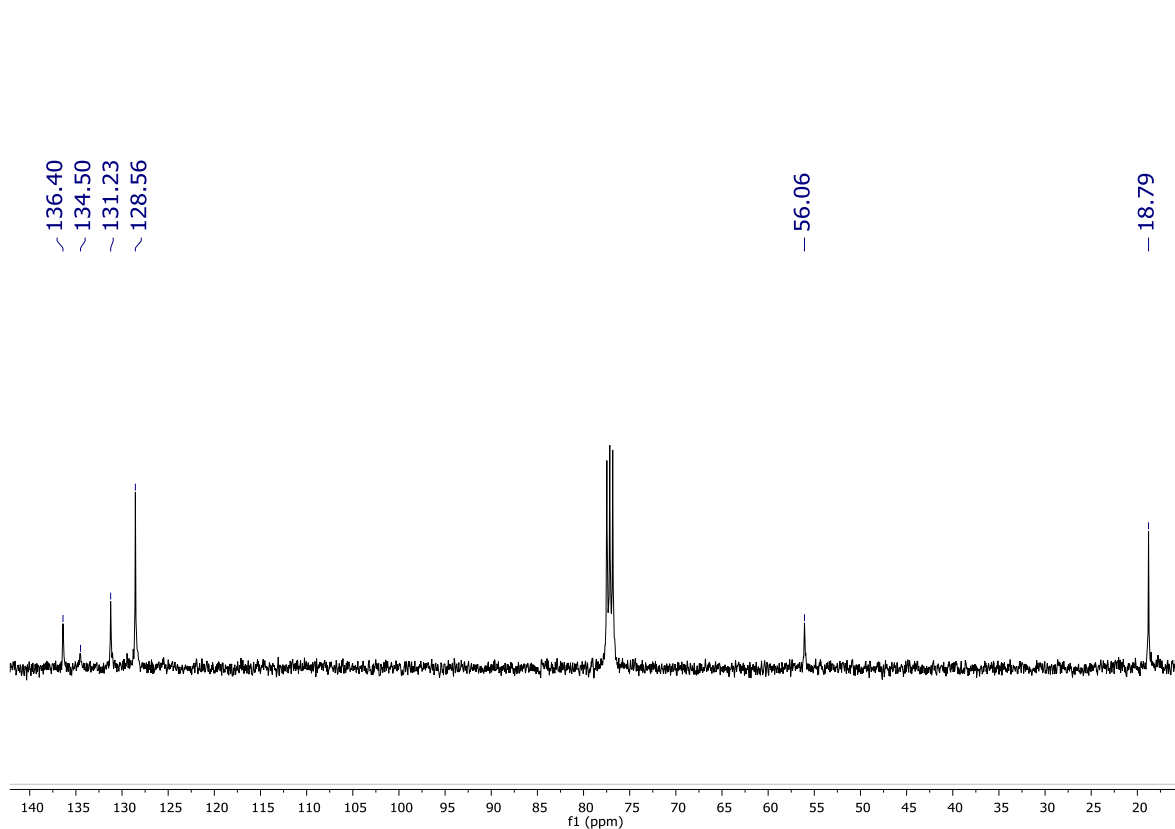

Figure S30.  $^{13}\text{C}\{^1\text{H}\}$  NMR ( $\text{CDCl}_3$ ) of compound **4c**,  $[\text{Ni}\{\text{S}_2\text{P}(\text{OMe})_2\}(\text{CNXyl})_2]\text{ClO}_4$ .

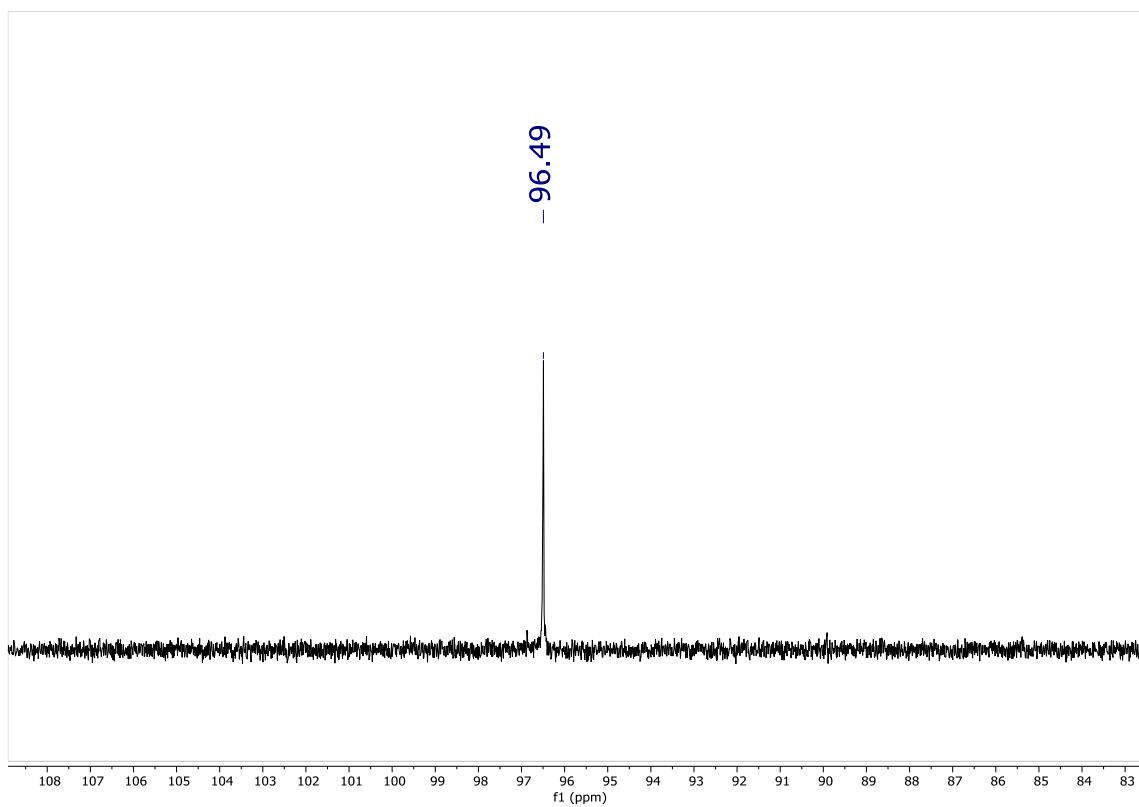

Figure S31.  $^{31}\text{P}\{^1\text{H}\}$  NMR ( $\text{CDCl}_3$ ) of compound 4c,  $[\text{Ni}\{\text{S}_2\text{P}(\text{OMe})_2\}\{\text{CNXyl}\}_2]\text{ClO}_4$ .

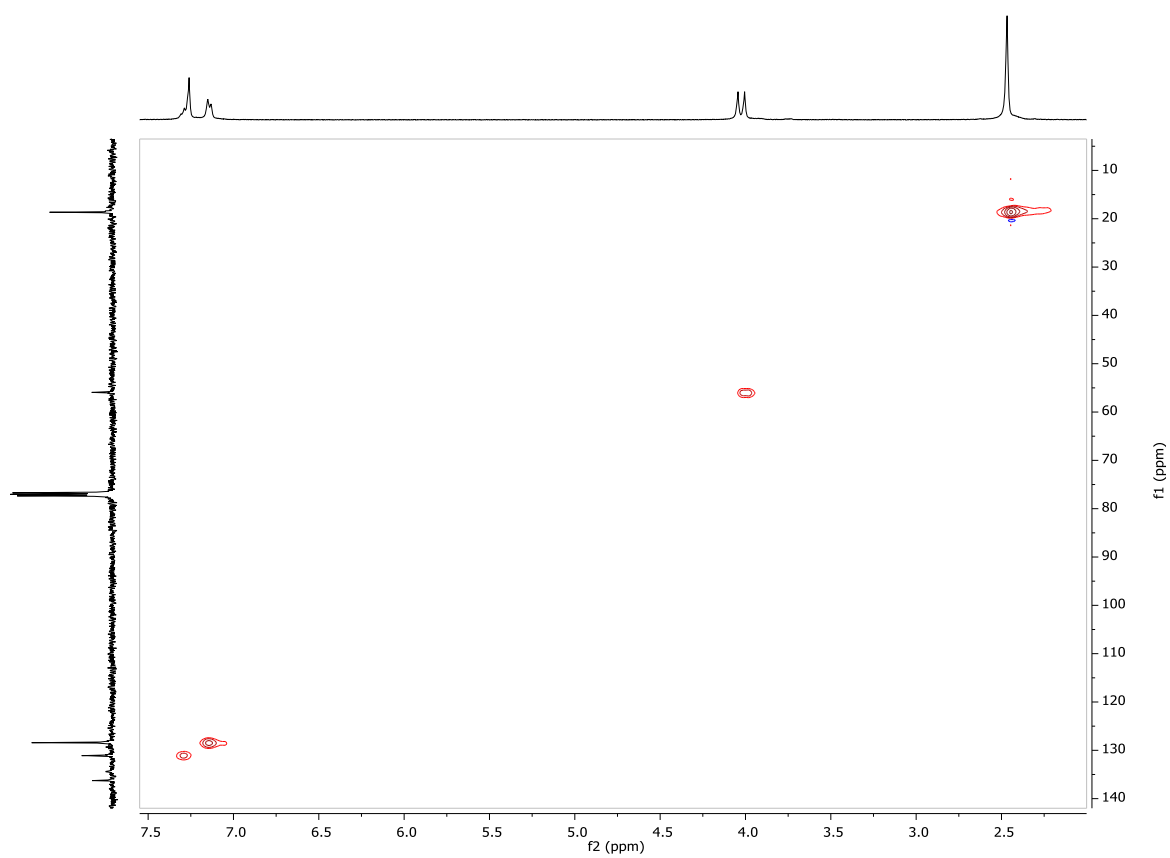

Figure S32.  $^1\text{H}\text{-}^{13}\text{C}\{^1\text{H}\}$  HSQC NMR ( $\text{CDCl}_3$ ) of compound 4c,  $[\text{Ni}\{\text{S}_2\text{P}(\text{OMe})_2\}\{\text{CNXyl}\}_2]\text{ClO}_4$ .

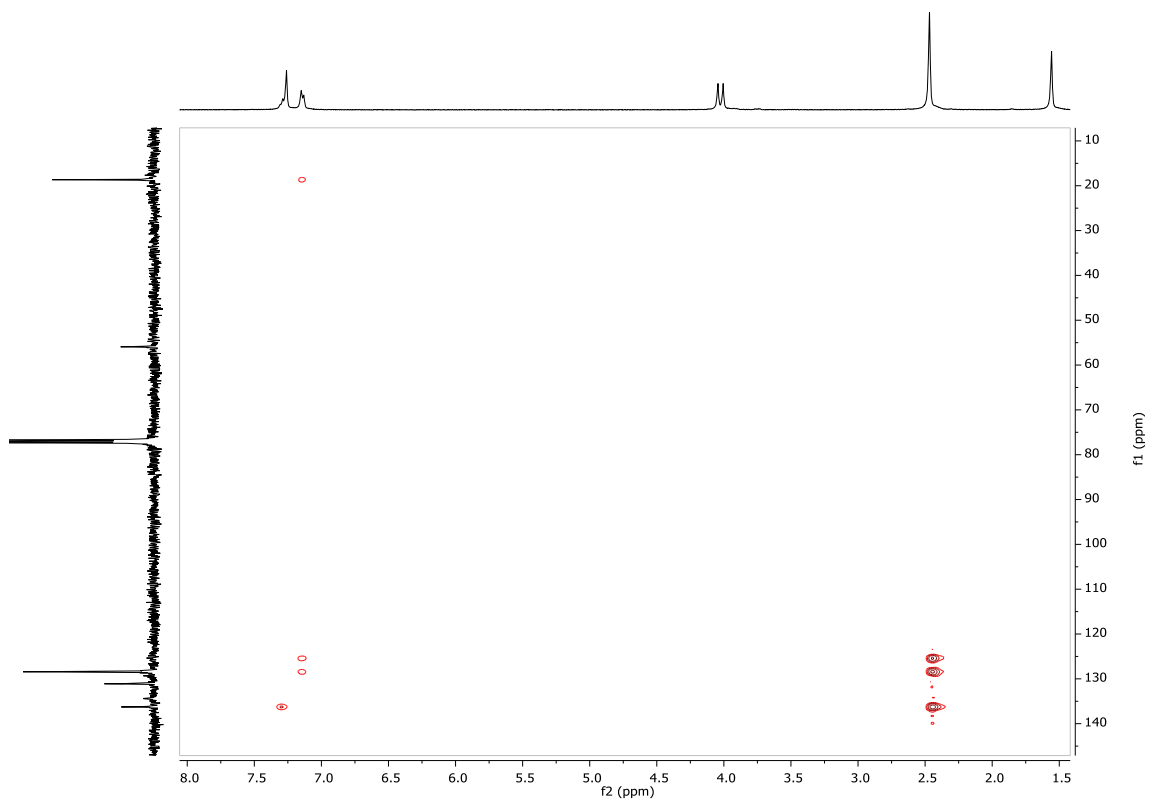

Figure S33.  $^1\text{H}$ - $^{13}\text{C}\{^1\text{H}\}$  HMBC NMR ( $\text{CDCl}_3$ ) of compound **4c**,  $[\text{Ni}\{\text{S}_2\text{P}(\text{OMe})_2\}(\text{CNXyl})_2]\text{ClO}_4$ .

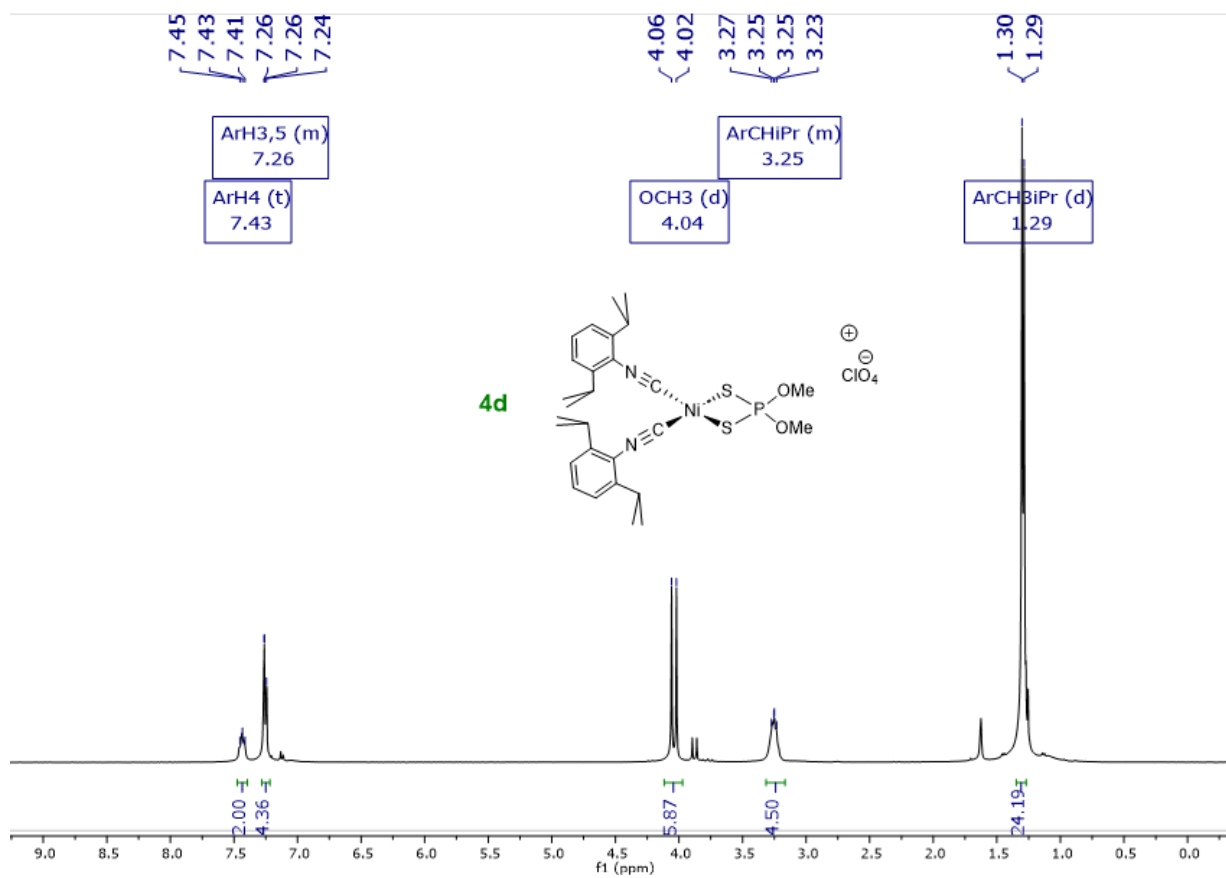

Figure S34.  $^1\text{H}$  NMR ( $\text{CDCl}_3$ ) of compound **4d**,  $[\text{Ni}\{\text{S}_2\text{P}(\text{OMe})_2\}(\text{CNAr})_2]\text{ClO}_4$ .

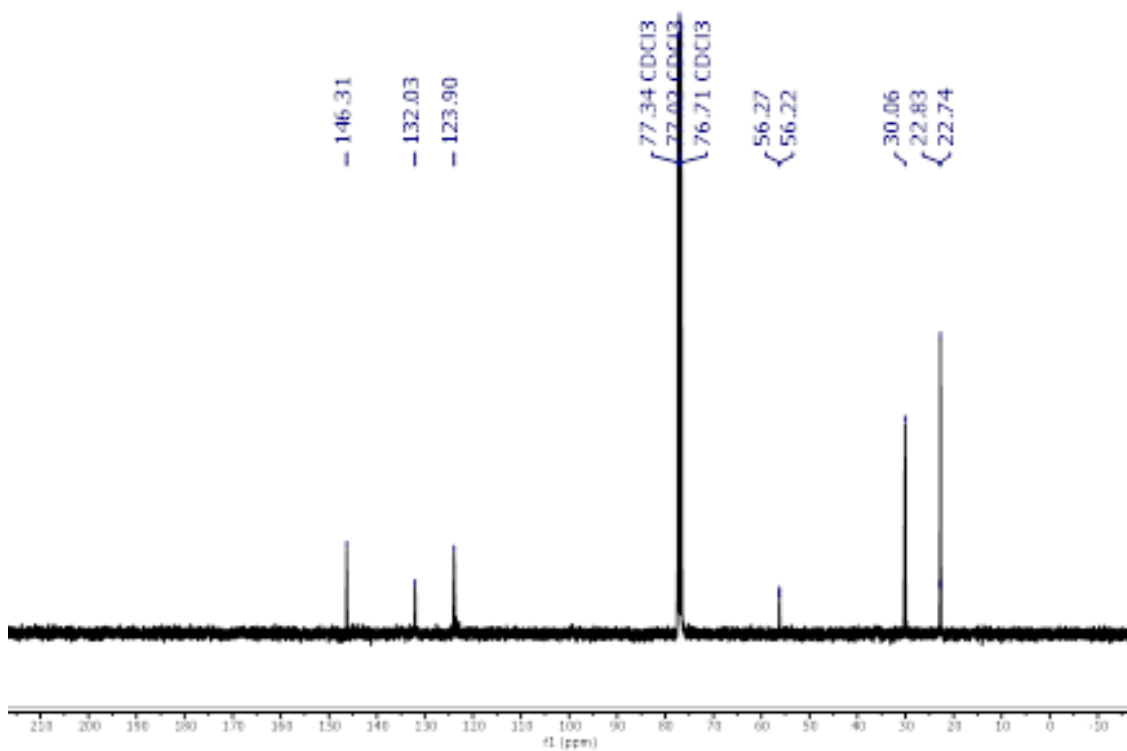

Figure S 35. <sup>13</sup>C {<sup>1</sup>H} NMR (CDCl<sub>3</sub>) of compound 4d, [Ni{S<sub>2</sub>P(OMe)<sub>2</sub>}(CNAr)<sub>2</sub>]ClO<sub>4</sub>.

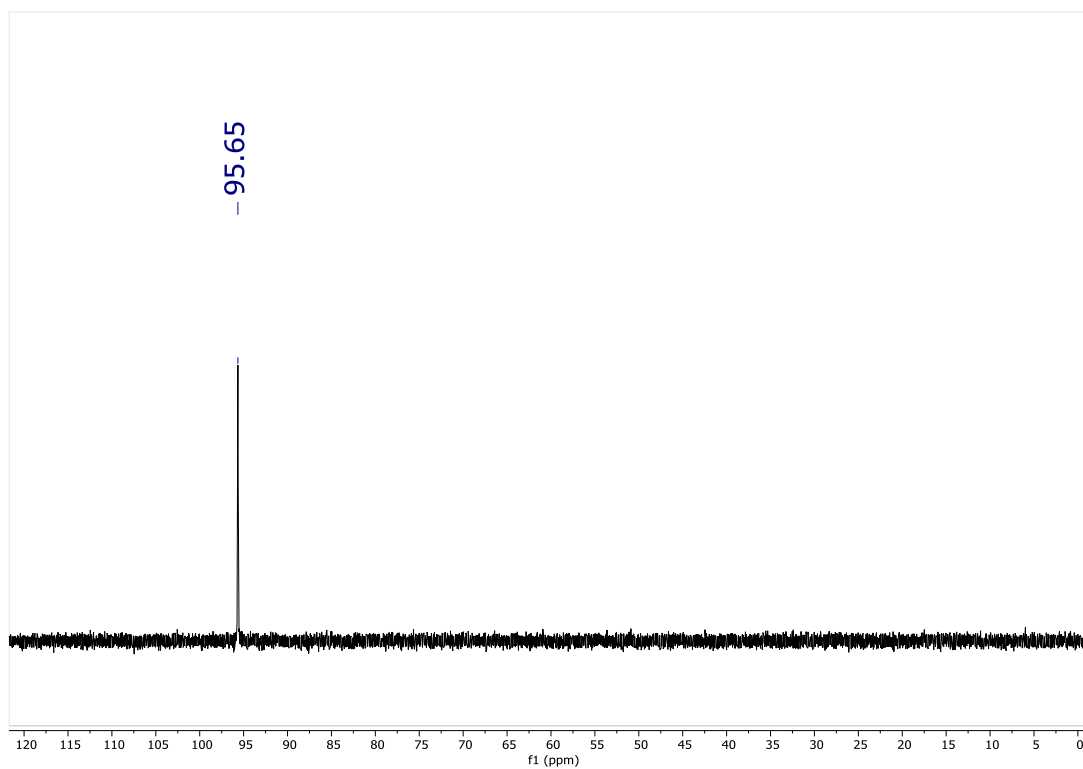

Figure S 36. <sup>31</sup>P {<sup>1</sup>H} NMR (CDCl<sub>3</sub>) of compound 4d, [Ni{S<sub>2</sub>P(OMe)<sub>2</sub>}(CNAr)<sub>2</sub>]ClO<sub>4</sub>.

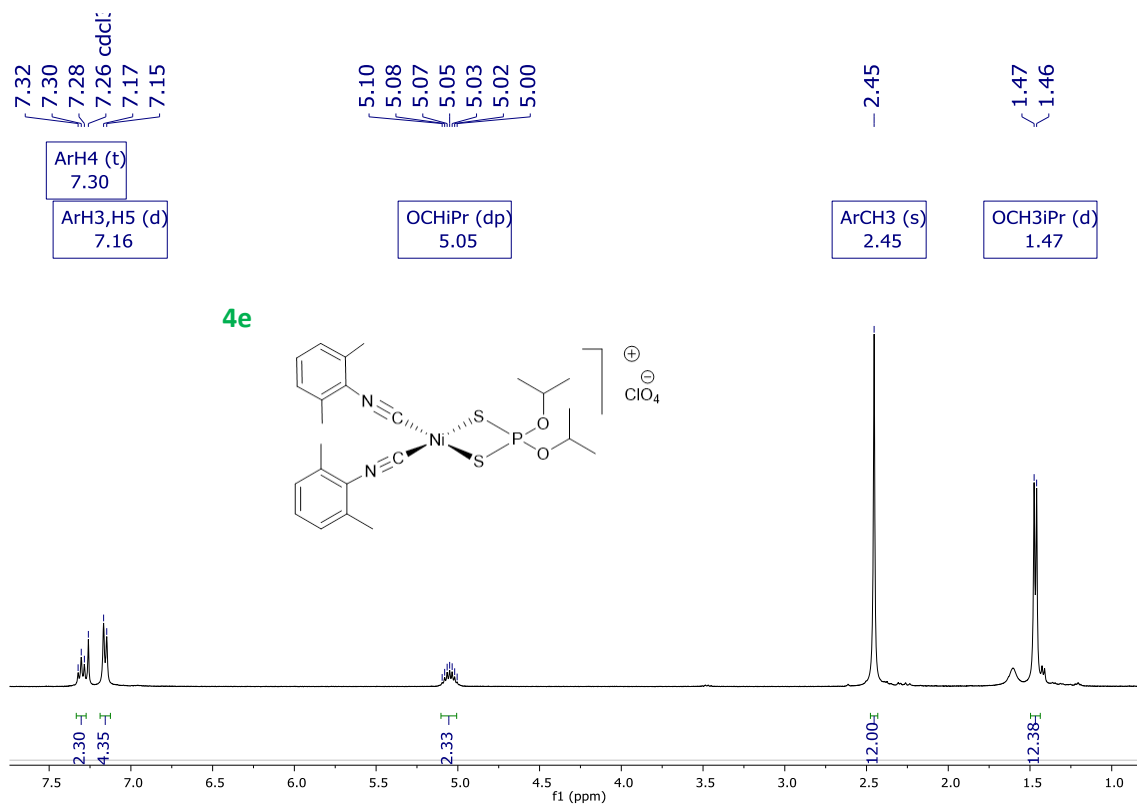

Figure S37. <sup>1</sup>H NMR (CDCl<sub>3</sub>) of compound 4e, [Ni{S<sub>2</sub>P(O<sup>i</sup>Pr)<sub>2</sub>}(CNXyl)<sub>2</sub>]ClO<sub>4</sub>.

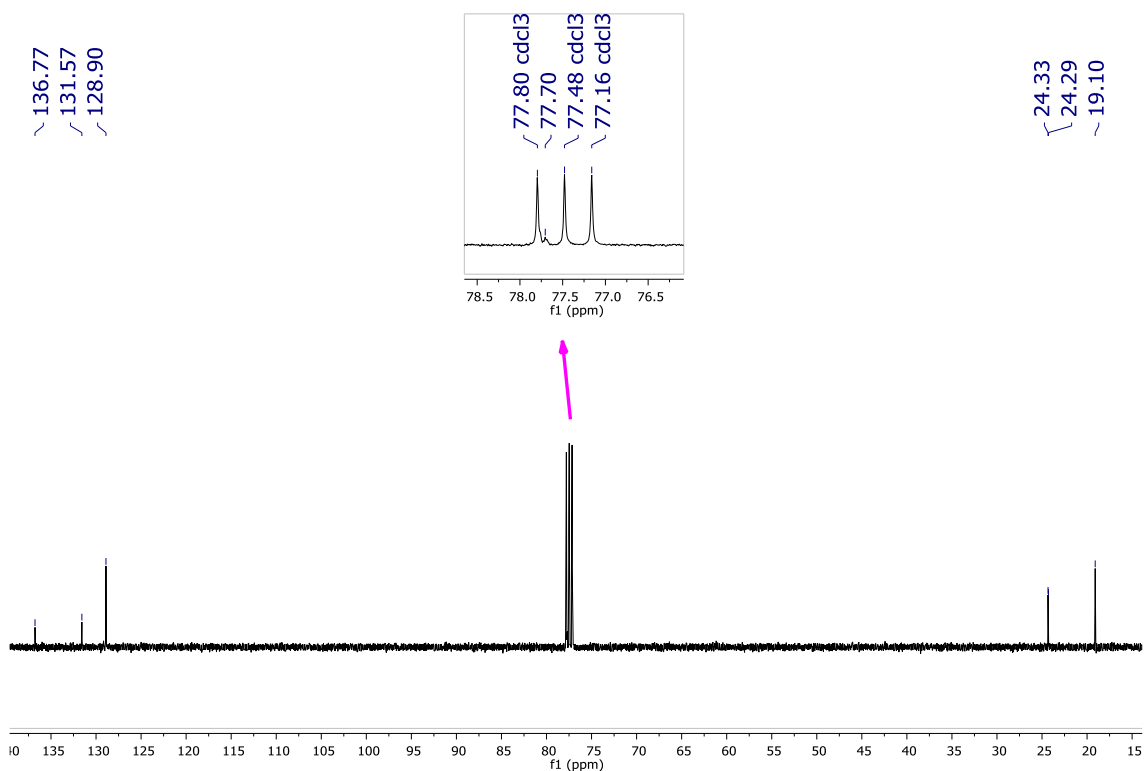

Figure S38. <sup>13</sup>C{<sup>1</sup>H} NMR (CDCl<sub>3</sub>) of compound 4e, [Ni{S<sub>2</sub>P(O<sup>i</sup>Pr)<sub>2</sub>}(CNXyl)<sub>2</sub>]ClO<sub>4</sub>.

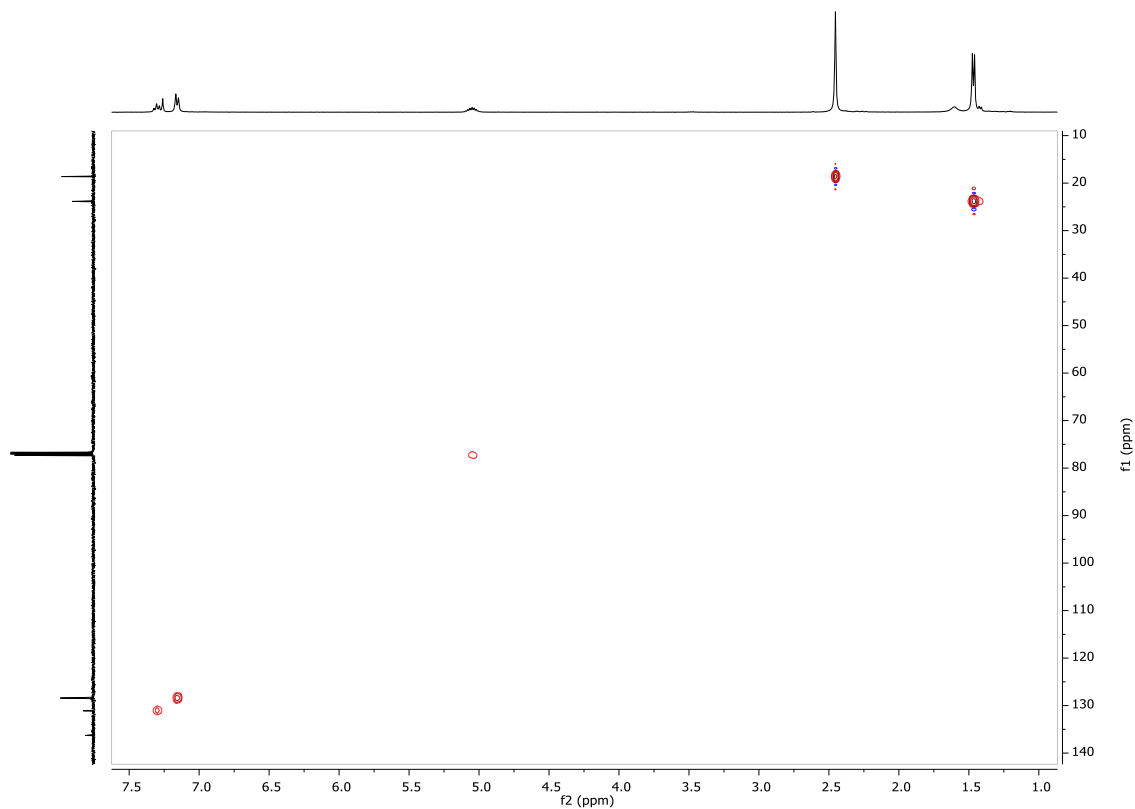

Figure S39.  $^1\text{H}$ - $^{13}\text{C}\{^1\text{H}\}$  HSQC NMR ( $\text{CDCl}_3$ ) of compound 4e,  $[\text{Ni}\{\text{S}_2\text{P}(\text{O}^i\text{Pr})_2\}(\text{CNXyl})_2]\text{ClO}_4$ .

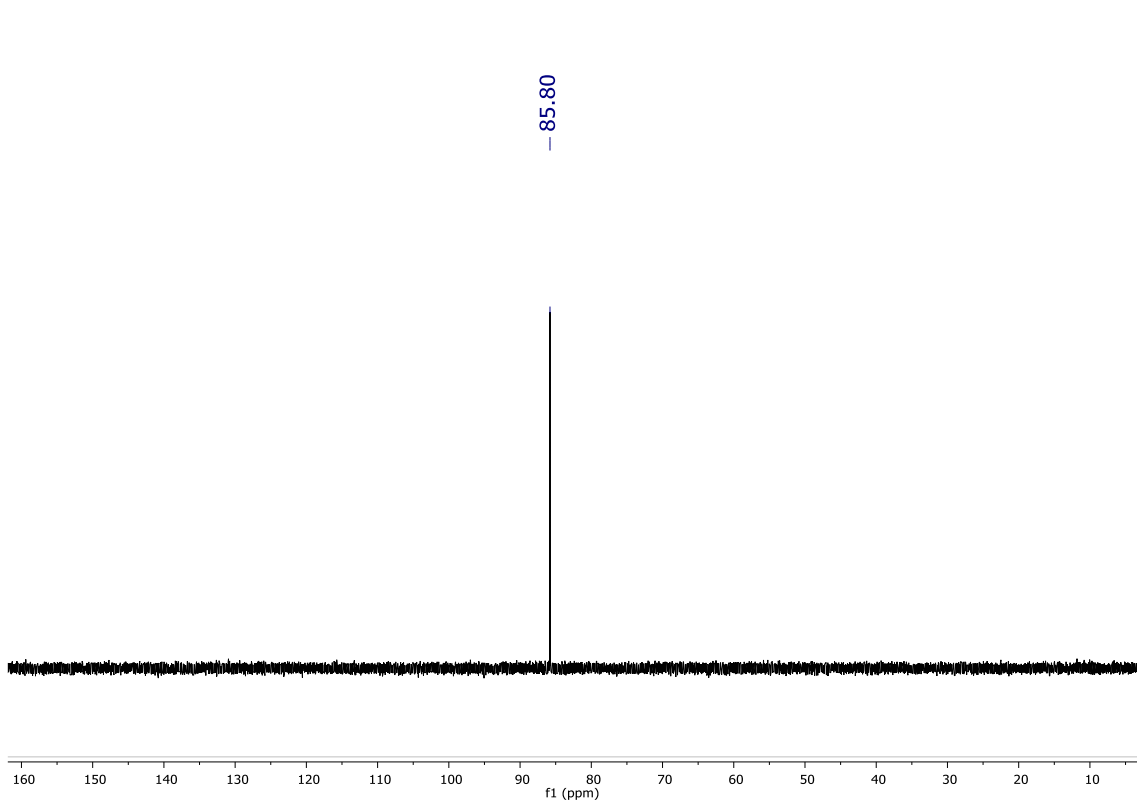

Figure S40.  $^{31}\text{P}\{^1\text{H}\}$  NMR ( $\text{CDCl}_3$ ) of compound 4e,  $[\text{Ni}\{\text{S}_2\text{P}(\text{O}^i\text{Pr})_2\}(\text{CNXyl})_2]\text{ClO}_4$ .



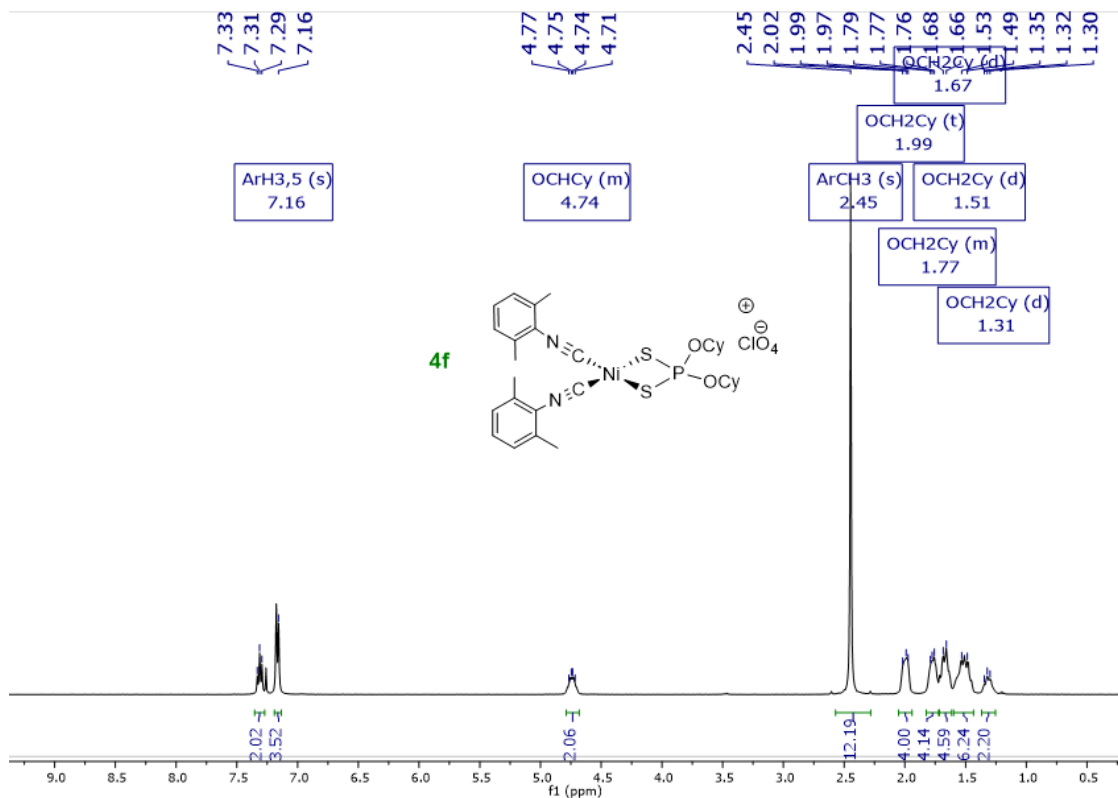

Figure S 41.  $^1\text{H}$  NMR ( $\text{CDCl}_3$ ) of compound 4f,  $[\text{Ni}\{\text{S}_2\text{P}(\text{OCy})_2\}(\text{CNXyl})_2]\text{ClO}_4$

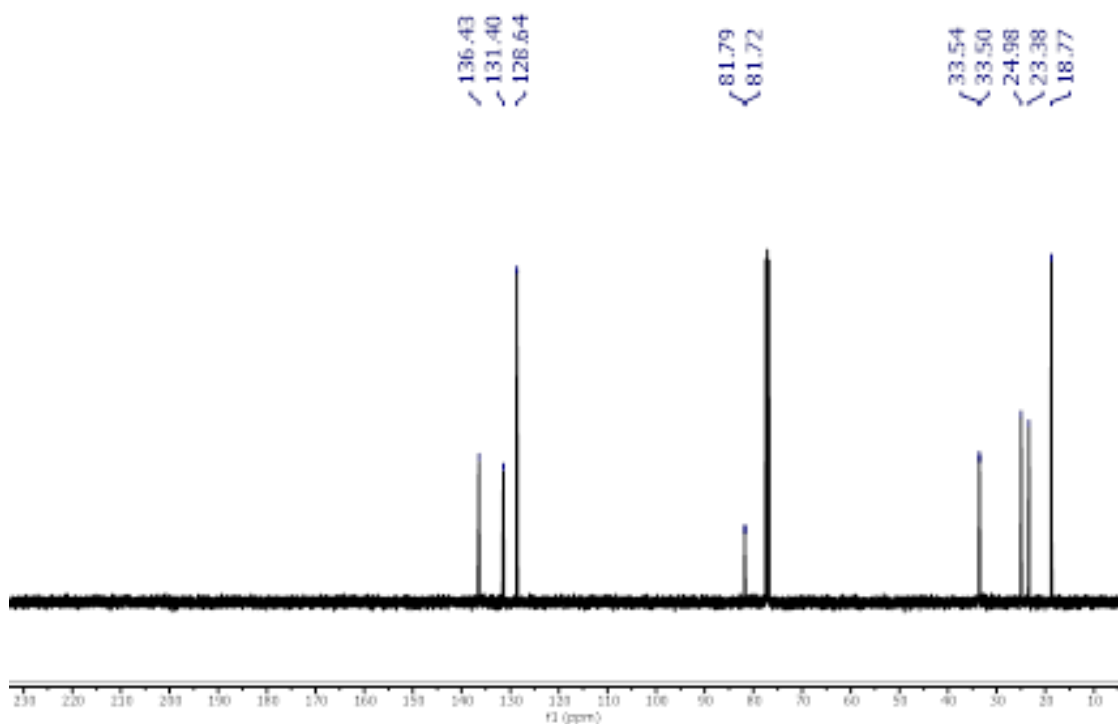

Figure S 42.  $^{13}\text{C}$   $\{^1\text{H}\}$  NMR ( $\text{CDCl}_3$ ) of compound 4f,  $[\text{Ni}\{\text{S}_2\text{P}(\text{OCy})_2\}(\text{CNXyl})_2]\text{ClO}_4$

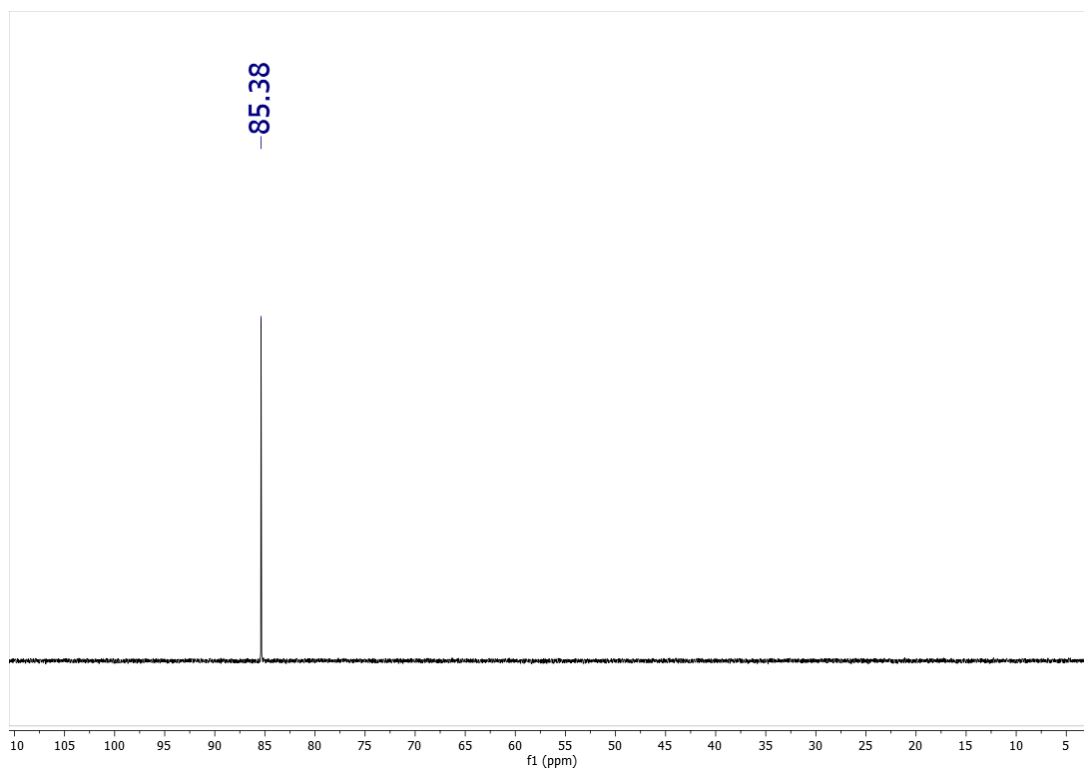

Figure S 43.  $^{31}\text{P}$   $\{^1\text{H}\}$  NMR ( $\text{CDCl}_3$ ) of compound 4f,  $[\text{Ni}\{\text{S}_2\text{P}(\text{OCy})_2\}(\text{CNXyl})_2]\text{ClO}_4$

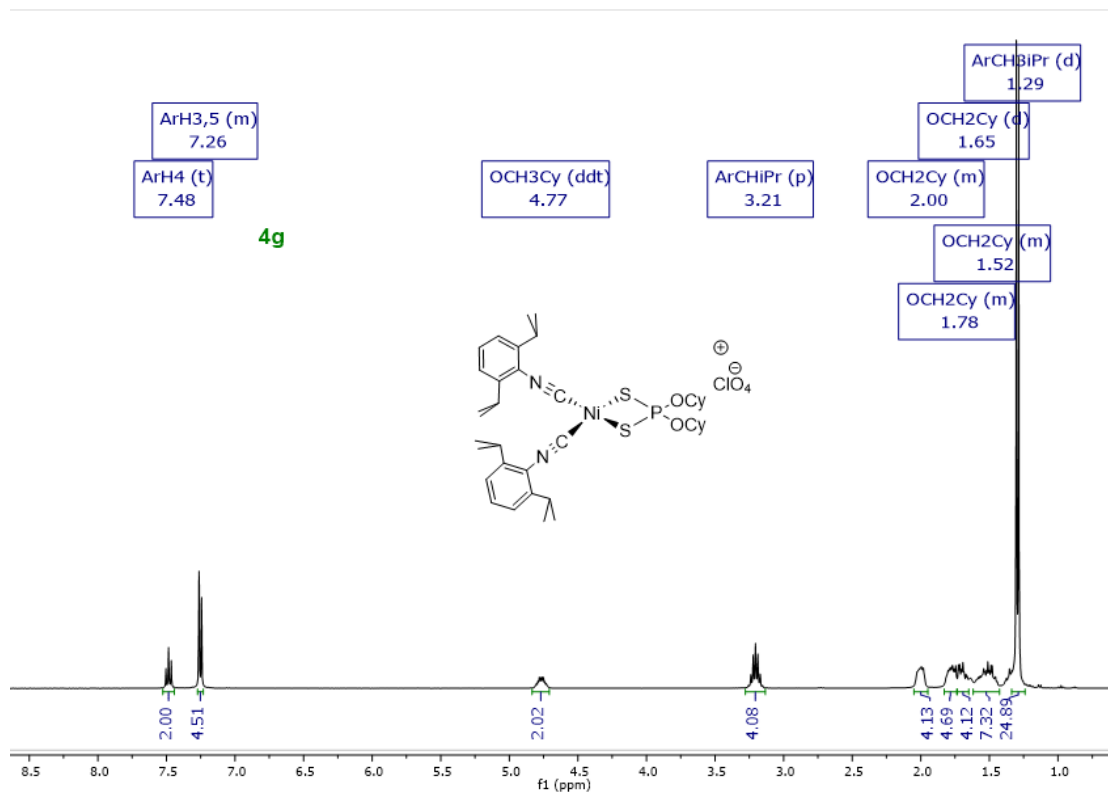

Figure S 44.  $^1\text{H}$  NMR ( $\text{CDCl}_3$ ) of compound 4g,  $[\text{Ni}\{\text{S}_2\text{P}(\text{OCy})_2\}(\text{CNAr})_2]\text{ClO}_4$ .

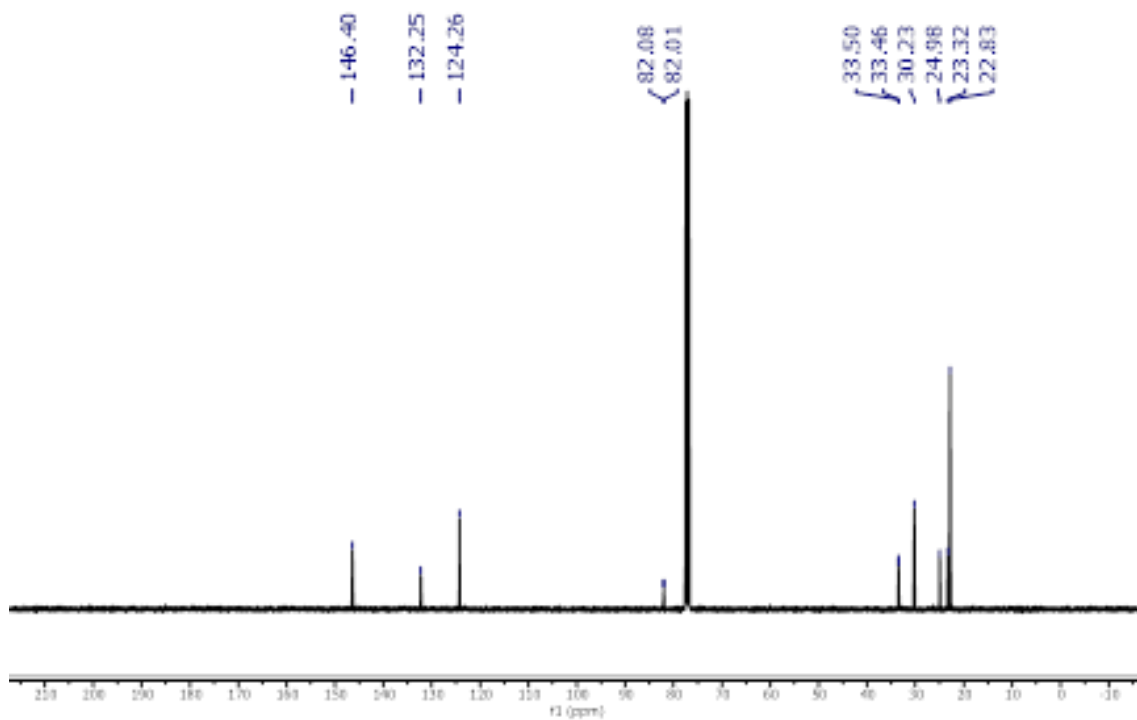

Figure S 45.  $^{13}\text{C}$   $\{^1\text{H}\}$  NMR ( $\text{CDCl}_3$ ) of compound 4g,  $[\text{Ni}\{\text{S}_2\text{P}(\text{OCy})_2\}(\text{CNAr})_2]\text{ClO}_4$

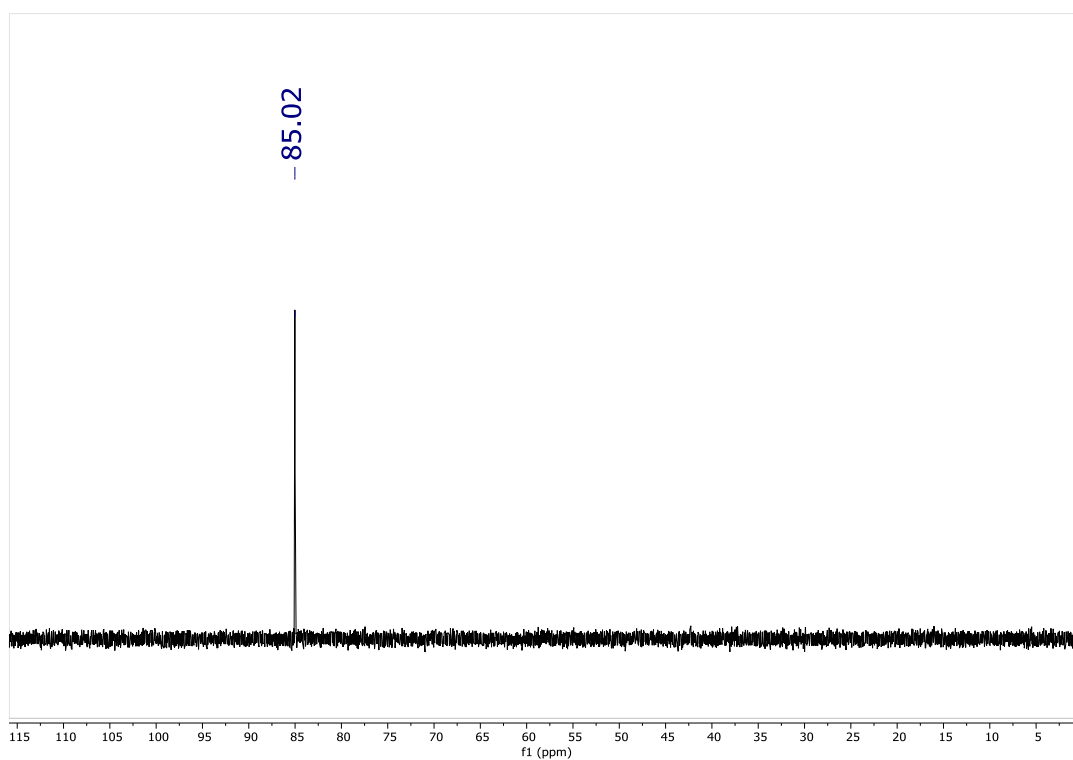

Figure S 46.  $^{31}\text{P}$   $\{^1\text{H}\}$  NMR ( $\text{CDCl}_3$ ) of compound 4g,  $[\text{Ni}\{\text{S}_2\text{P}(\text{OCy})_2\}(\text{CNAr})_2]\text{ClO}_4$

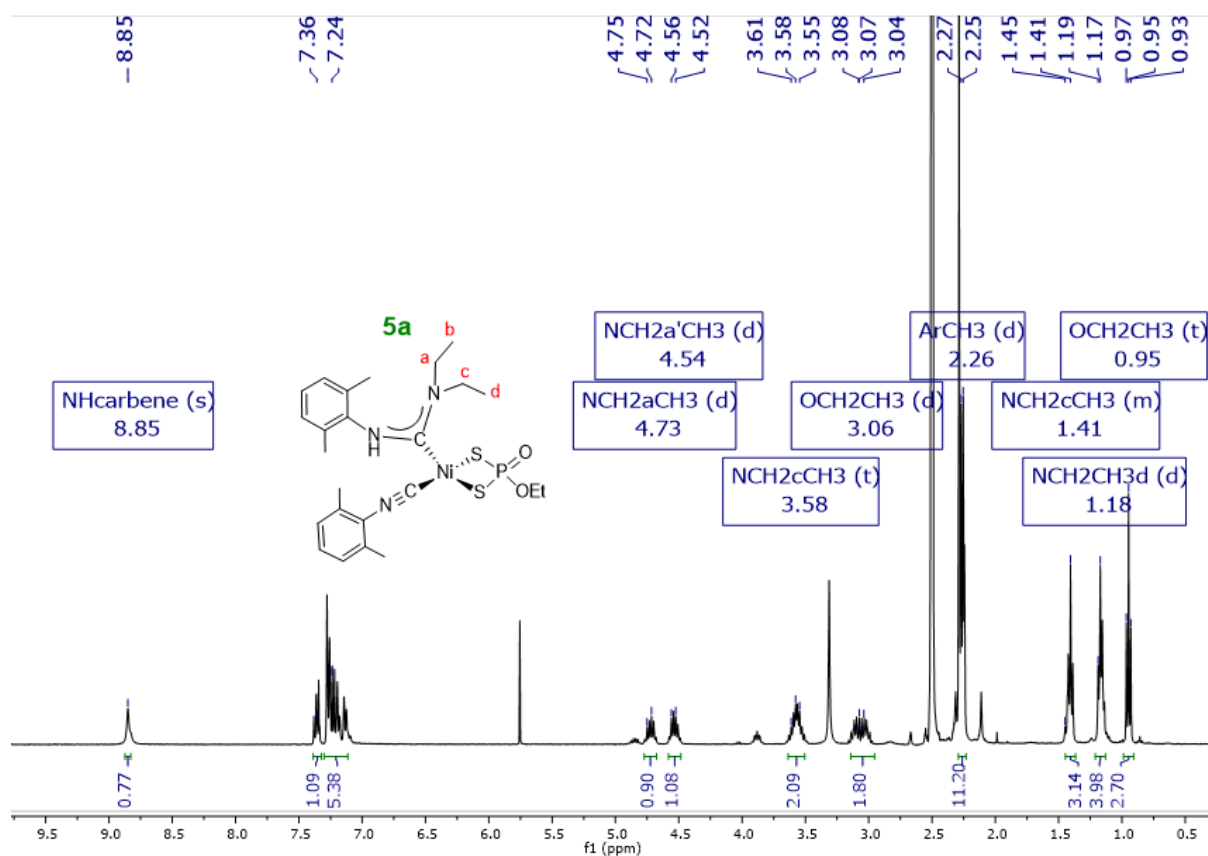

Figure S 47.  $^1\text{H}$  NMR (DMSO- $d_6$ ) of compound 5a,  $[\text{Ni}(\text{S}_2\text{P}(=\text{O})(\text{OEt})(\text{CNXyl})\{\text{C}(\text{NHXyl})(\text{NEt}_2)\})]$ .

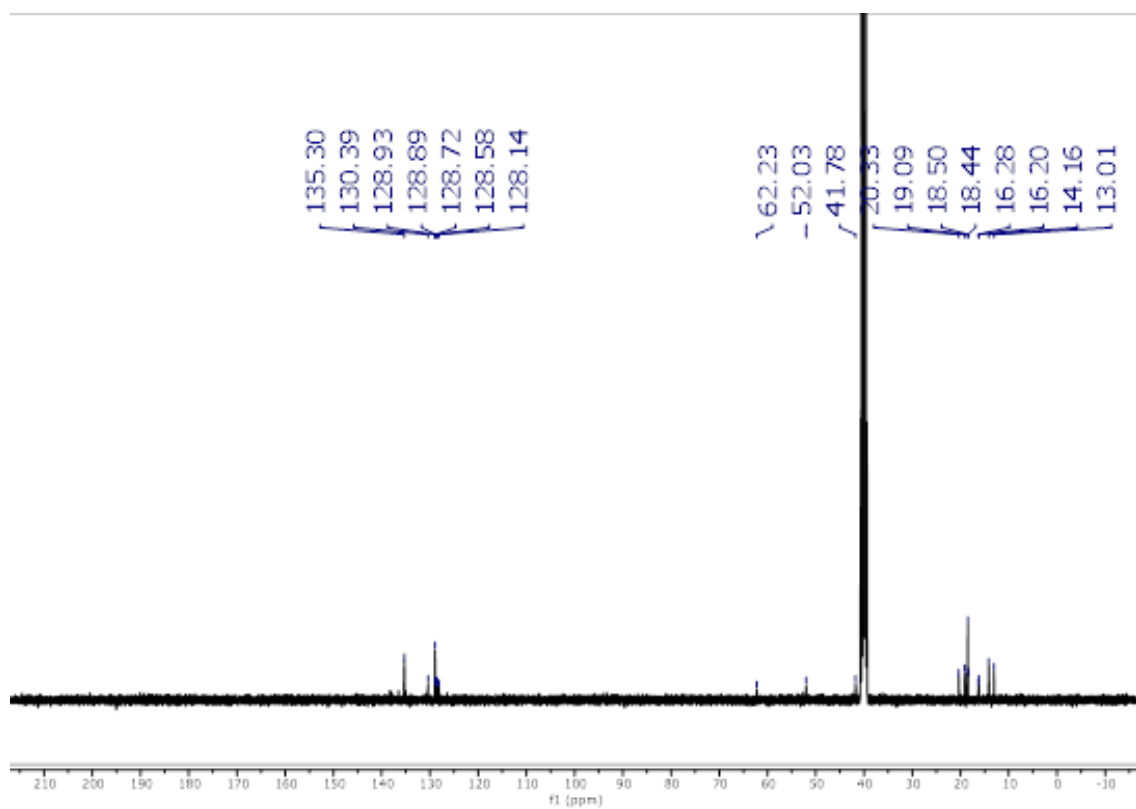

Figure S 48.  $^{13}\text{C}\{^1\text{H}\}$  NMR (DMSO- $d_6$ ) of compound 5a,  $[\text{Ni}(\text{S}_2\text{P}(=\text{O})(\text{OEt})(\text{CNXyl})\{\text{C}(\text{NHXyl})(\text{NEt}_2)\})]$ .

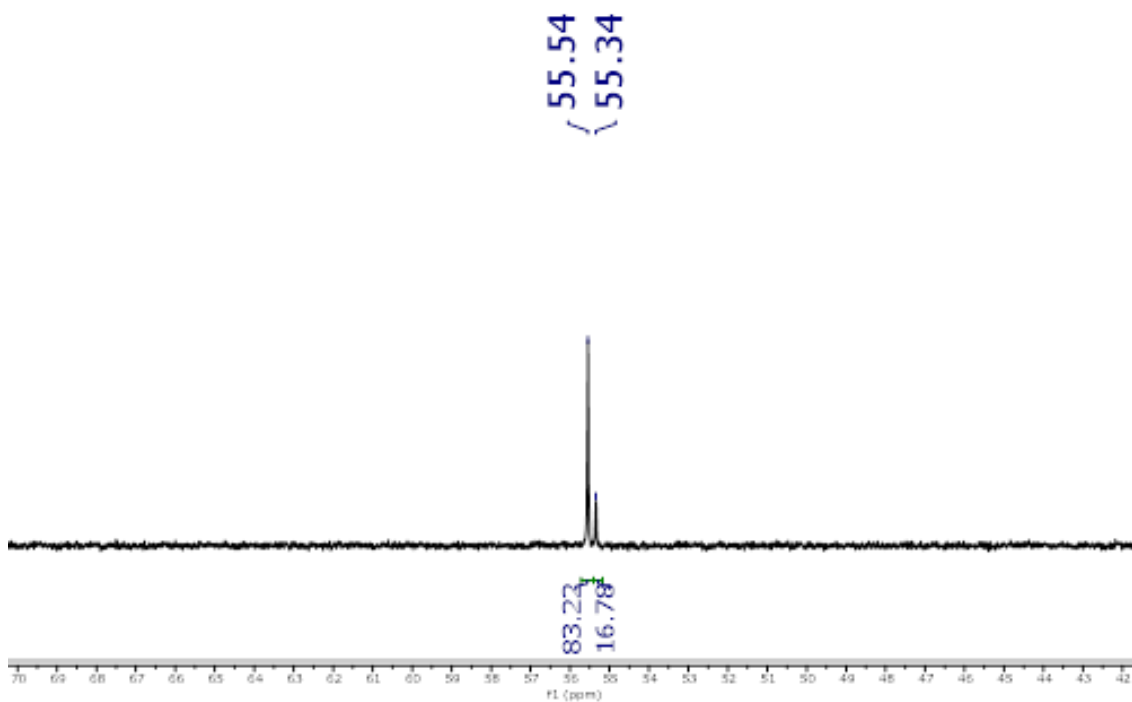

Figure S 49.  $^{31}\text{P}\{^1\text{H}\}$  NMR (DMSO- $d_6$ ) of compound 5a,  $[\text{Ni}(\text{S}_2\text{P}(=\text{O})(\text{OEt})(\text{CNXyl})\{\text{C}(\text{NHXyl})(\text{NEt}_2)\})]$ .

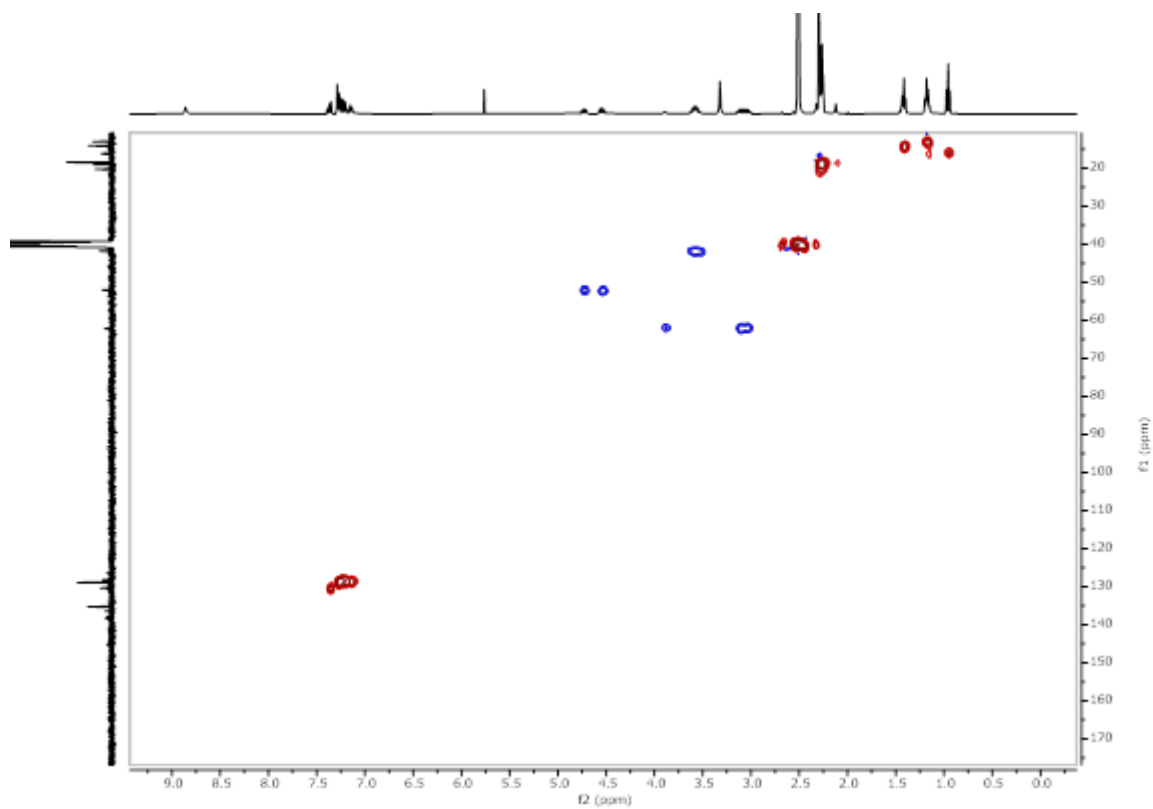

Figure S 50.  $^1\text{H}$ - $^{13}\text{C}\{^1\text{H}\}$  HSQC NMR ( $\text{CDCl}_3$ ) of compound 5b,  $[\text{Ni}(\text{S}_2\text{P}(=\text{O})(\text{OEt})(\text{CNXyl})\{\text{C}(\text{NHXyl})(\text{NEt}_2)\})]$ .

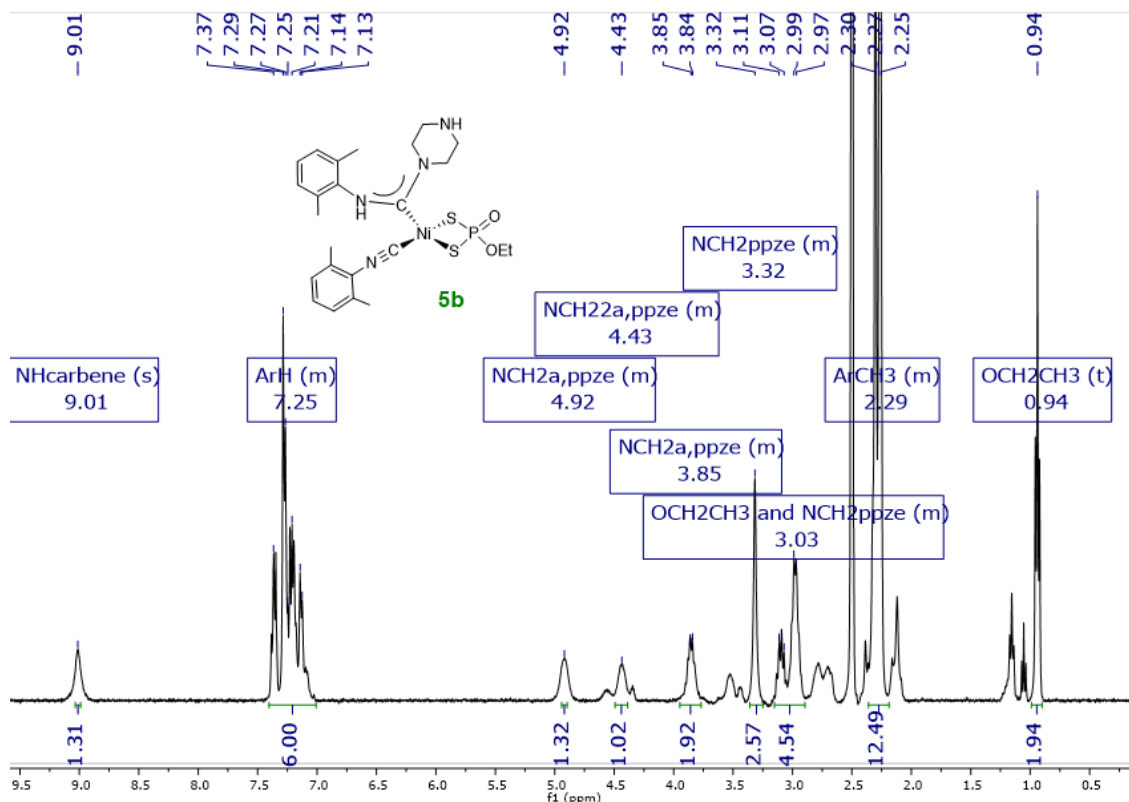

Figure S 51.  $^1\text{H}$  NMR (DMSO- $d_6$ ) of compound 5b,  $[\text{Ni}(\text{S}_2\text{P}(=\text{O})(\text{OEt})(\text{CNXyl})\{\text{C}(\text{NHXyl})(\text{Nppze})\})]$

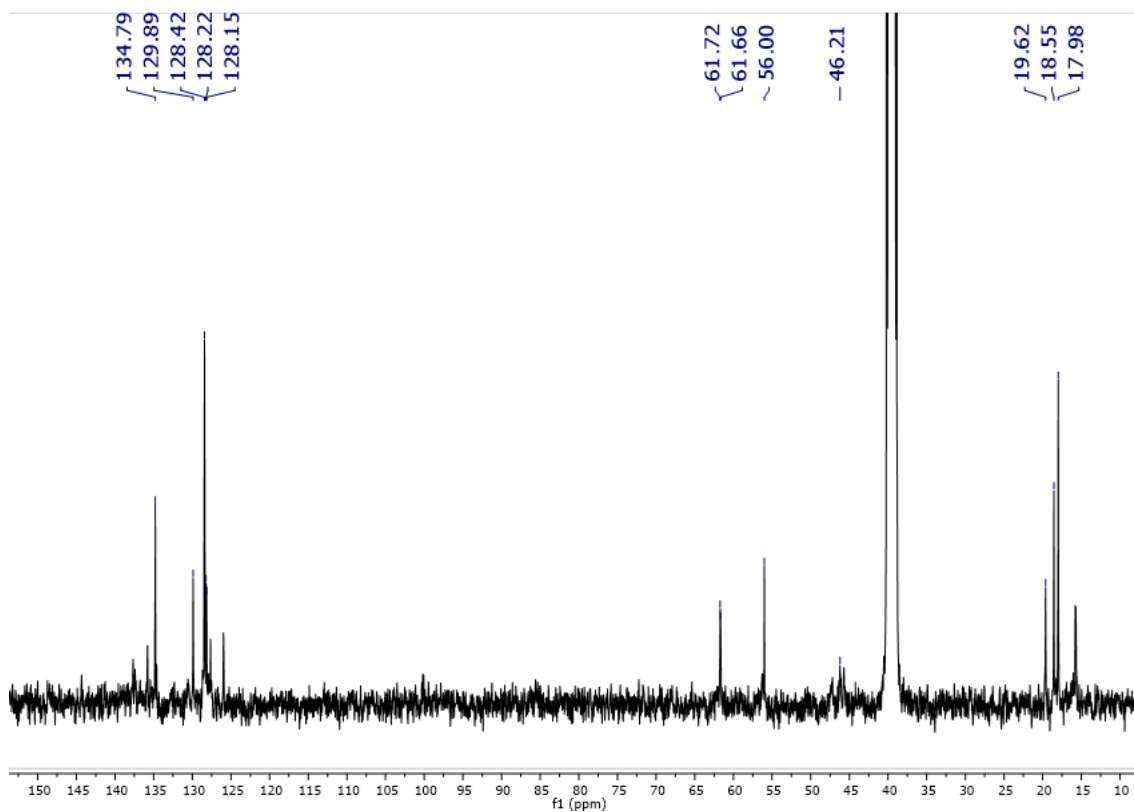

Figure S 52.  $^{13}\text{C}\{^1\text{H}\}$  NMR (DMSO- $d_6$ ) of compound 5b,  $[\text{Ni}(\text{S}_2\text{P}(=\text{O})(\text{OEt})(\text{CNXyl})\{\text{C}(\text{NHXyl})(\text{Nppze})\})]$

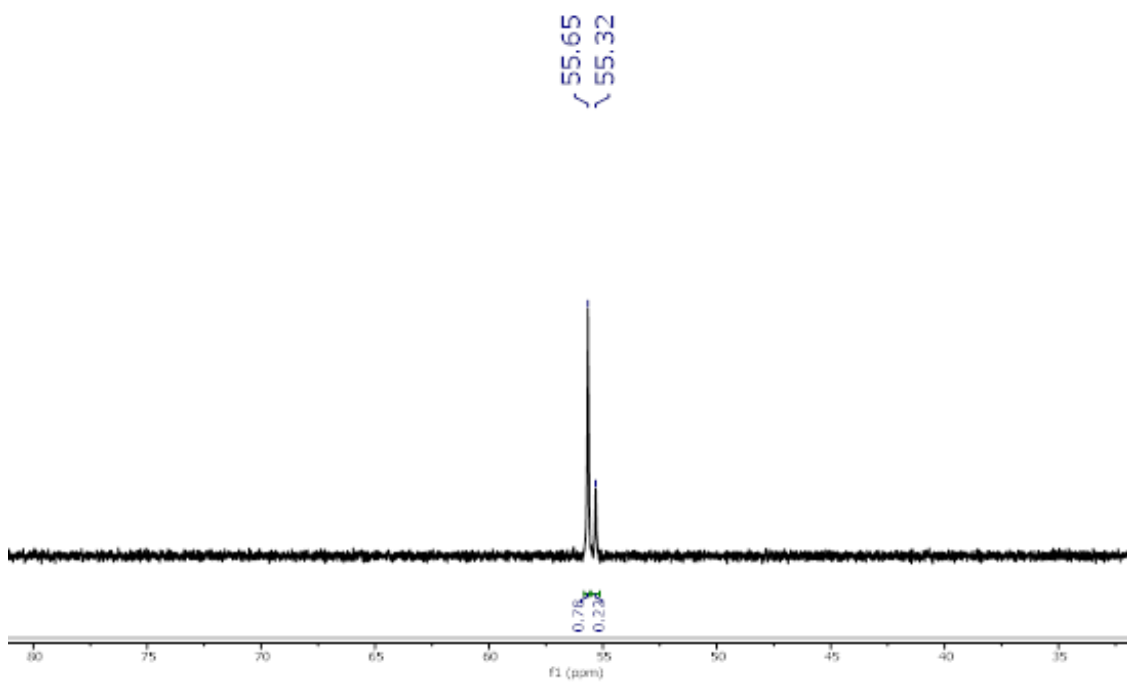

Figure S 53.  $^{31}\text{P}\{^1\text{H}\}$  NMR ( $\text{DMSO-d}_6$ ) of compound 5b,  $[\text{Ni}(\text{S}_2\text{P}(\text{=O})(\text{OEt})(\text{CNXyl})\{\text{C}(\text{NHXyl})(\text{NPpze})\})]$

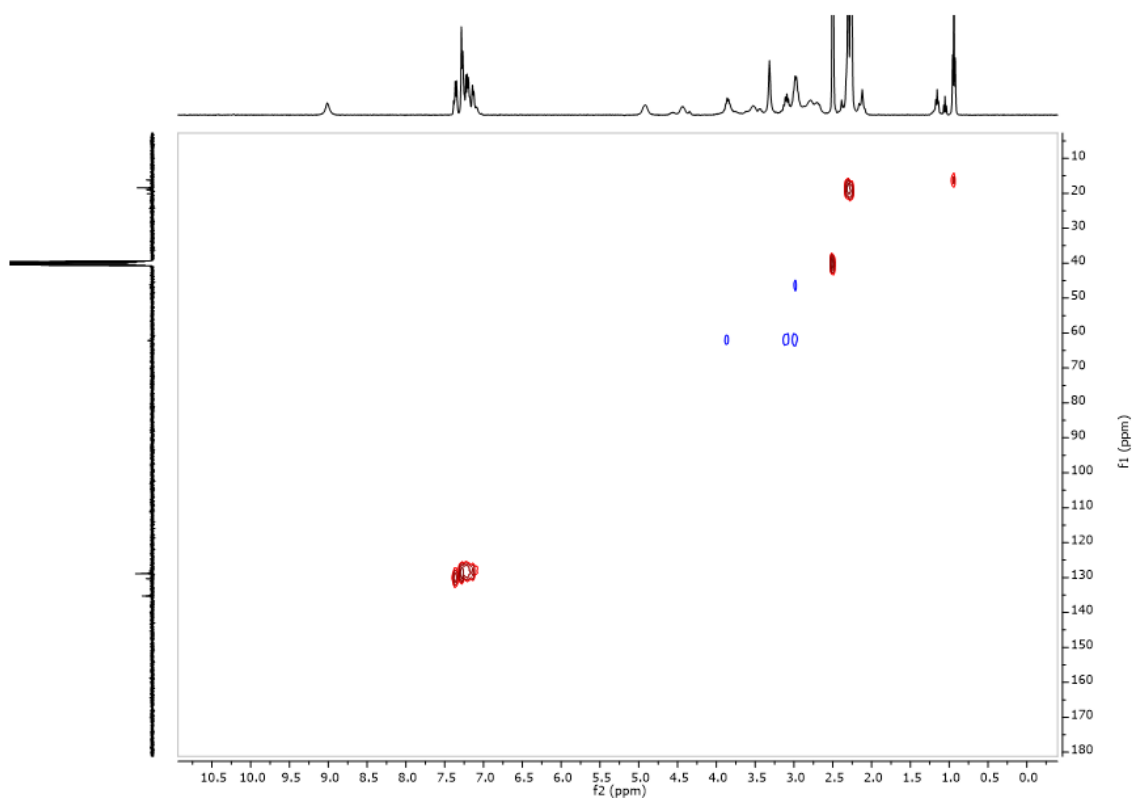

Figure S 54.  $^1\text{H}\text{-}^{13}\text{C}\{^1\text{H}\}$  HSQC NMR ( $\text{CDCl}_3$ ) of compound 5b,  $[\text{Ni}(\text{S}_2\text{P}(\text{=O})(\text{OEt})(\text{CNXyl})\{\text{C}(\text{NHXyl})(\text{NPpze})\})]$ .

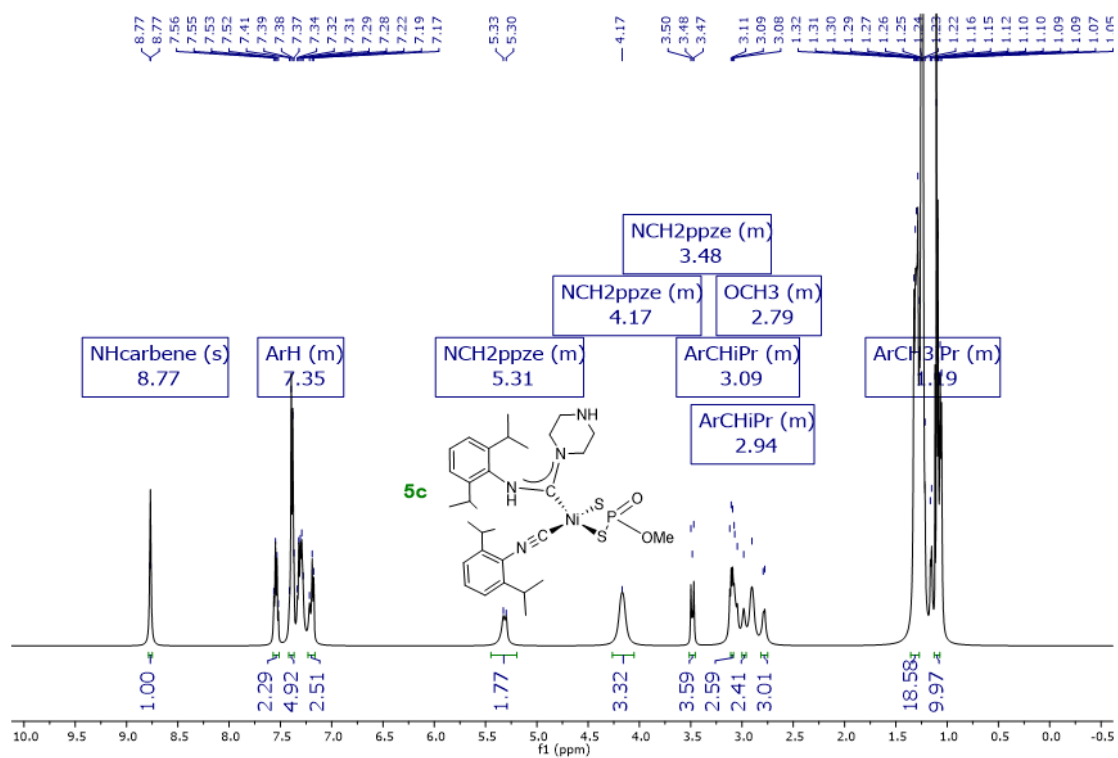

Figure S 55.  $^1\text{H}$  NMR (DMSO- $d_6$ ) of compound 5c,  $[\text{Ni}(\text{S}_2\text{P}(\text{=O})(\text{OMe})(\text{CNAr})\{\text{C}(\text{NHAr})(\text{Nppze})\})]$

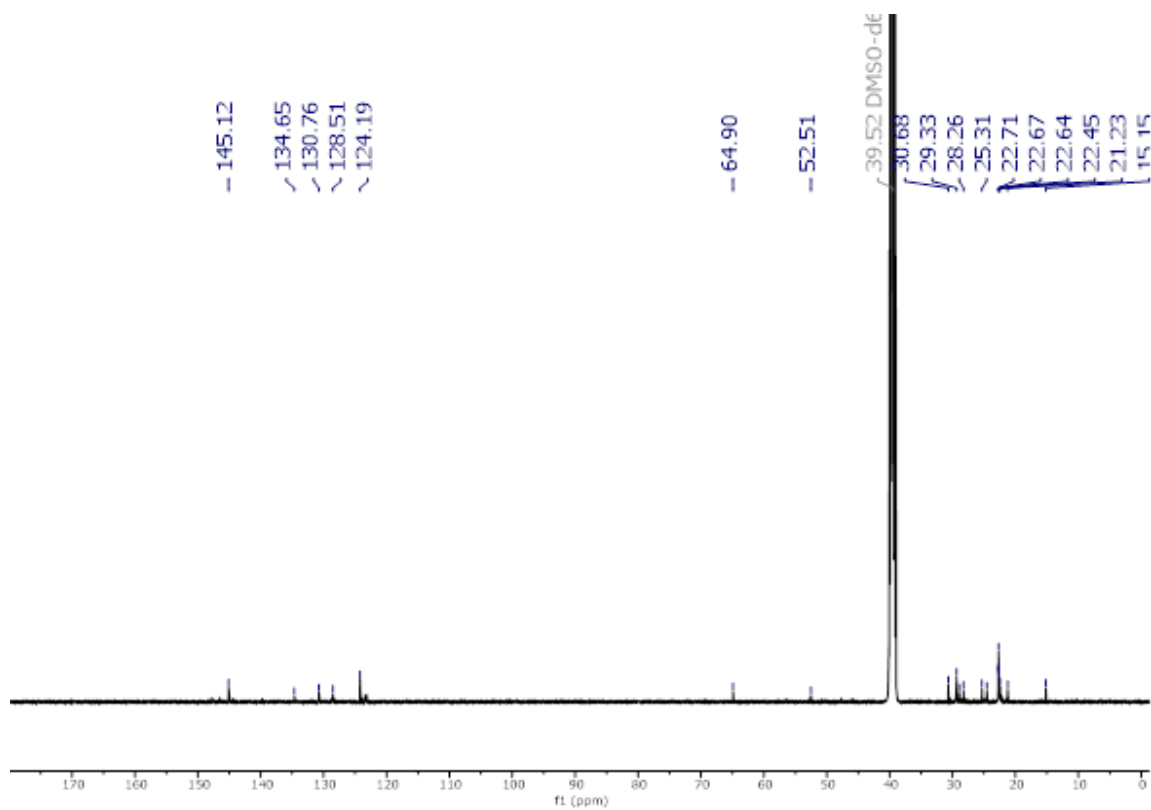

Figure S 56.  $^{13}\text{C}$   $\{^1\text{H}\}$  NMR (DMSO- $d_6$ ) of compound 5c,  $[\text{Ni}(\text{S}_2\text{P}(\text{=O})(\text{OEt})(\text{CNAr})\{\text{C}(\text{NHAr})(\text{Nppze})\})]$ .



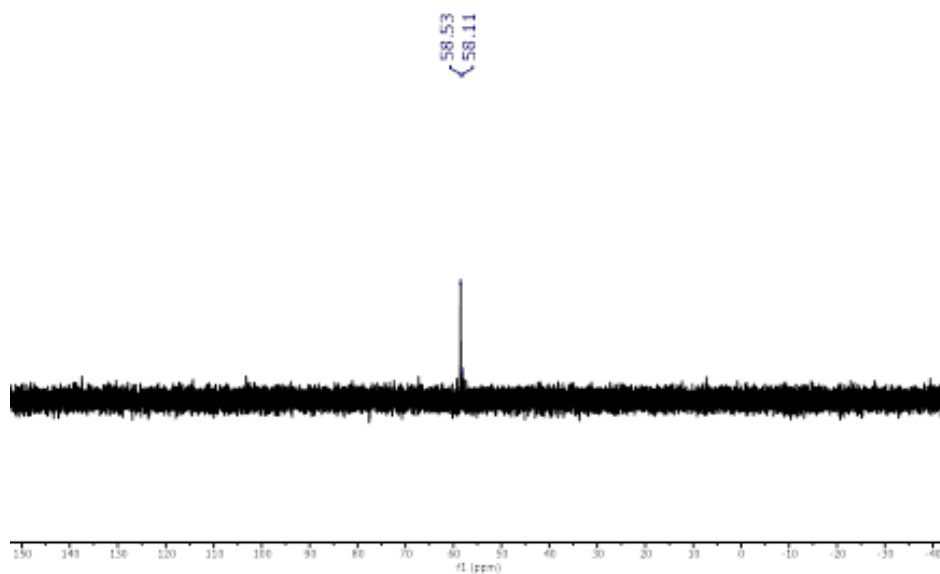

Figure S 57.  $^{31}\text{P}$   $\{^1\text{H}\}$  NMR (DMSO- $d_6$ ) of compound 5c,  $[\text{Ni}(\text{S}_2\text{P}(=\text{O})(\text{OEt})(\text{CNAr})\{\text{C}(\text{NHAr})(\text{Nppze})\})]$

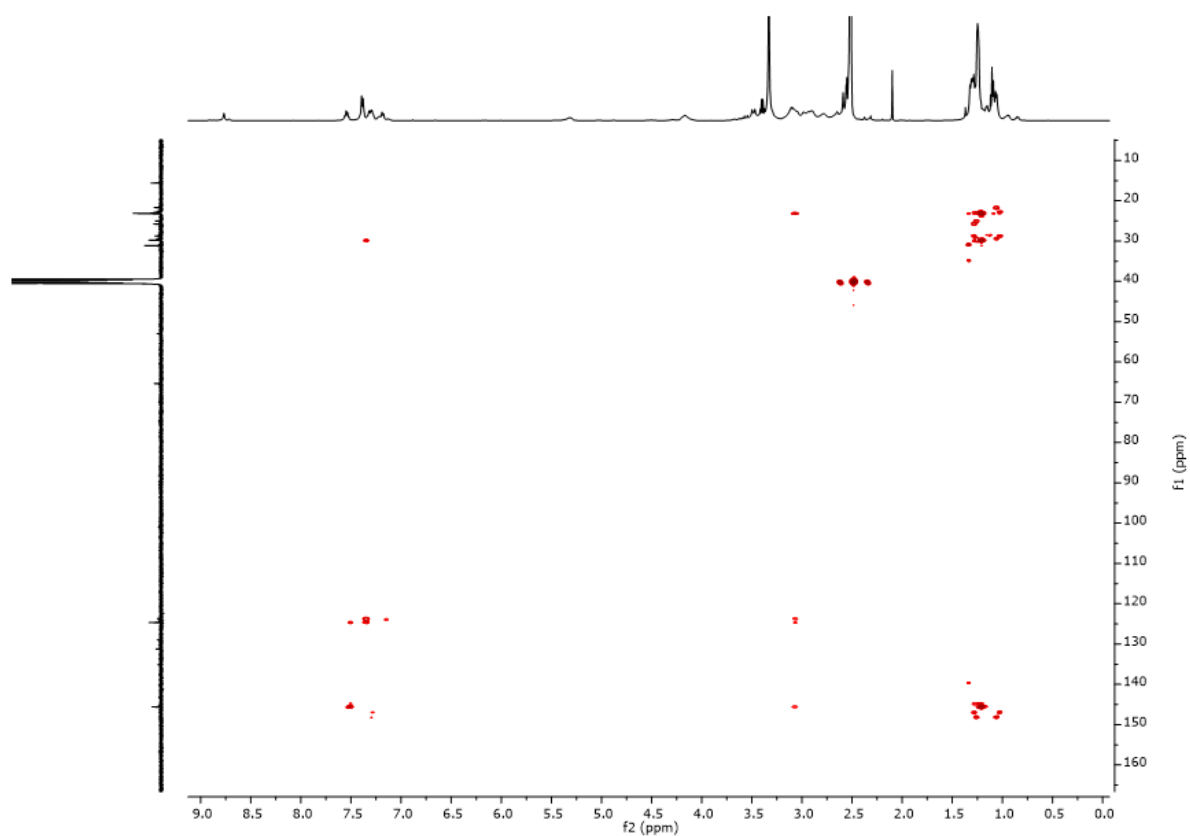

Figure S 58.  $^1\text{H}$ - $^{13}\text{C}\{^1\text{H}\}$  HMBC NMR ( $\text{CDCl}_3$ ) of compound 5c,  $[\text{Ni}(\text{S}_2\text{P}(=\text{O})(\text{OMe})(\text{CNAr})\{\text{C}(\text{NHAr})(\text{Nppze})\})]$ .

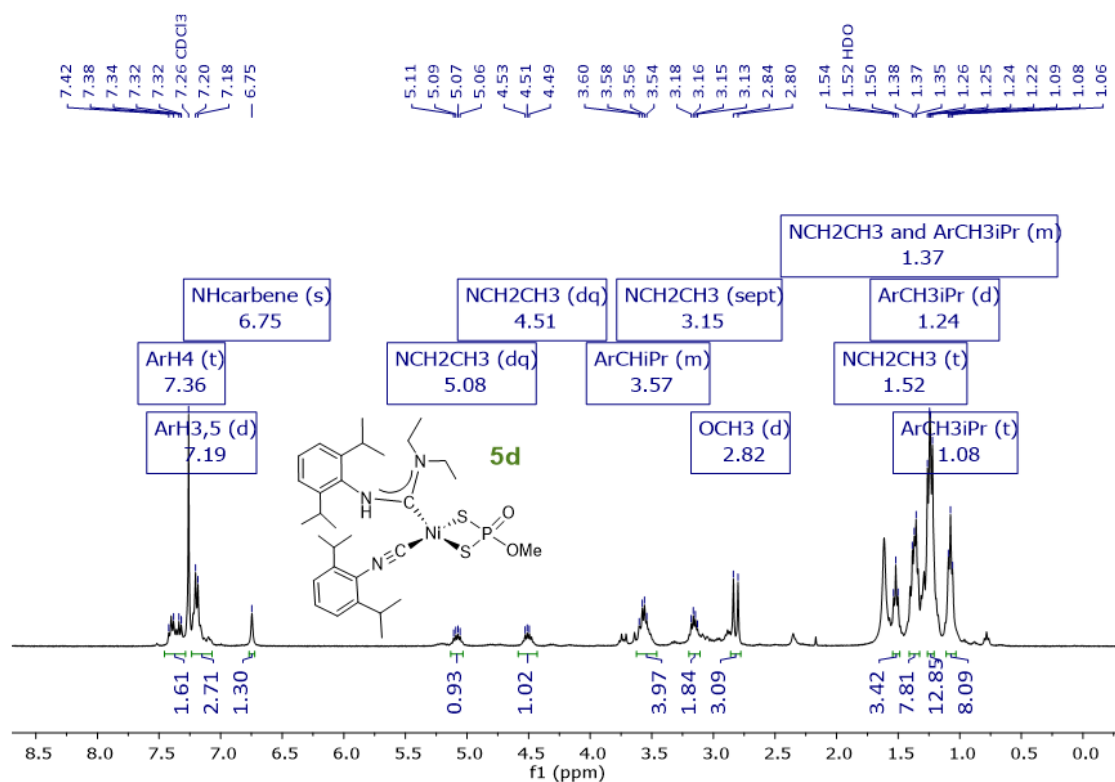

Figure S 56. <sup>1</sup>H NMR (CDCl<sub>3</sub>) of compound 5d, [Ni(S<sub>2</sub>P(=O)(OMe)(CNAr){C(NHAr)(NEt<sub>2</sub>)}.]

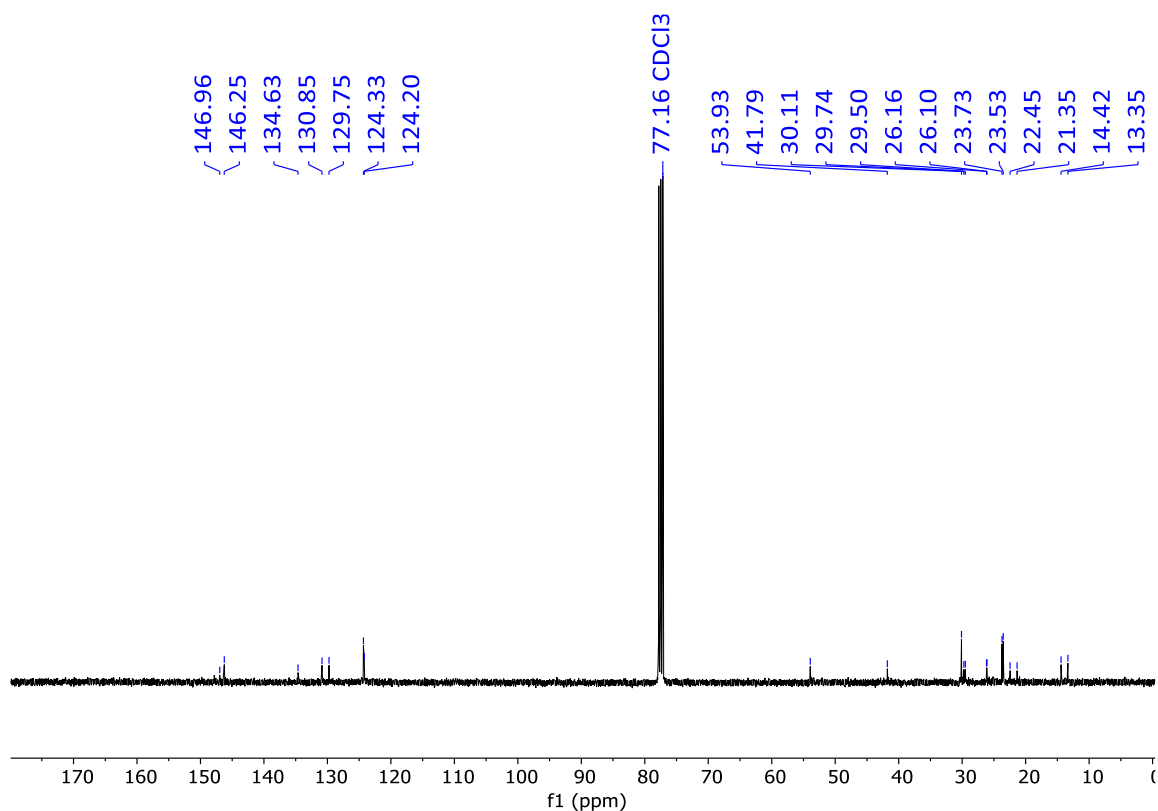

Figure S 57. <sup>13</sup>C NMR (CDCl<sub>3</sub>) of compound 5d, [Ni(S<sub>2</sub>P(=O)(OMe)(CNAr){C(NHAr)(NEt<sub>2</sub>)}.]

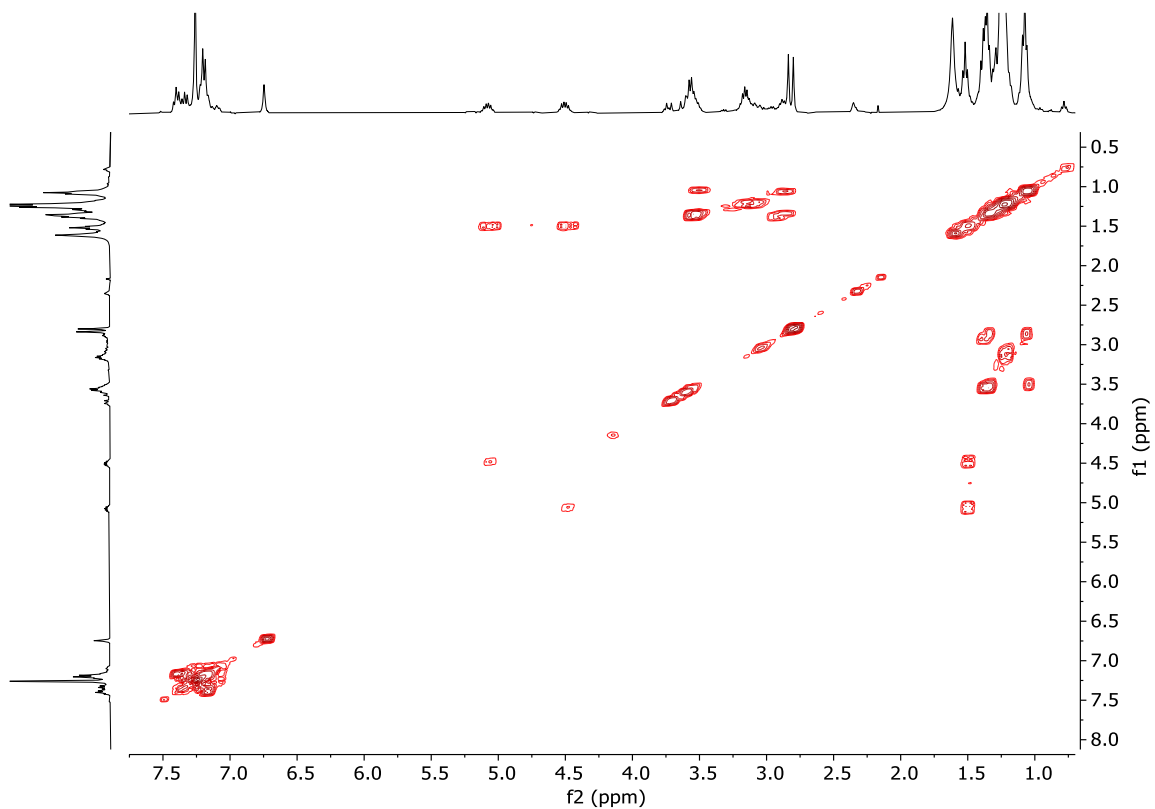

Figure S 58.  $^1\text{H}$ - $^1\text{H}$  COSY NMR (DMSO- $d_6$ ) of compound 5d,  $[\text{Ni}(\text{S}_2\text{P}=\text{O})(\text{OMe})(\text{CNAr})\{\text{C}(\text{NHAr})(\text{NEt}_2)\}]$ .

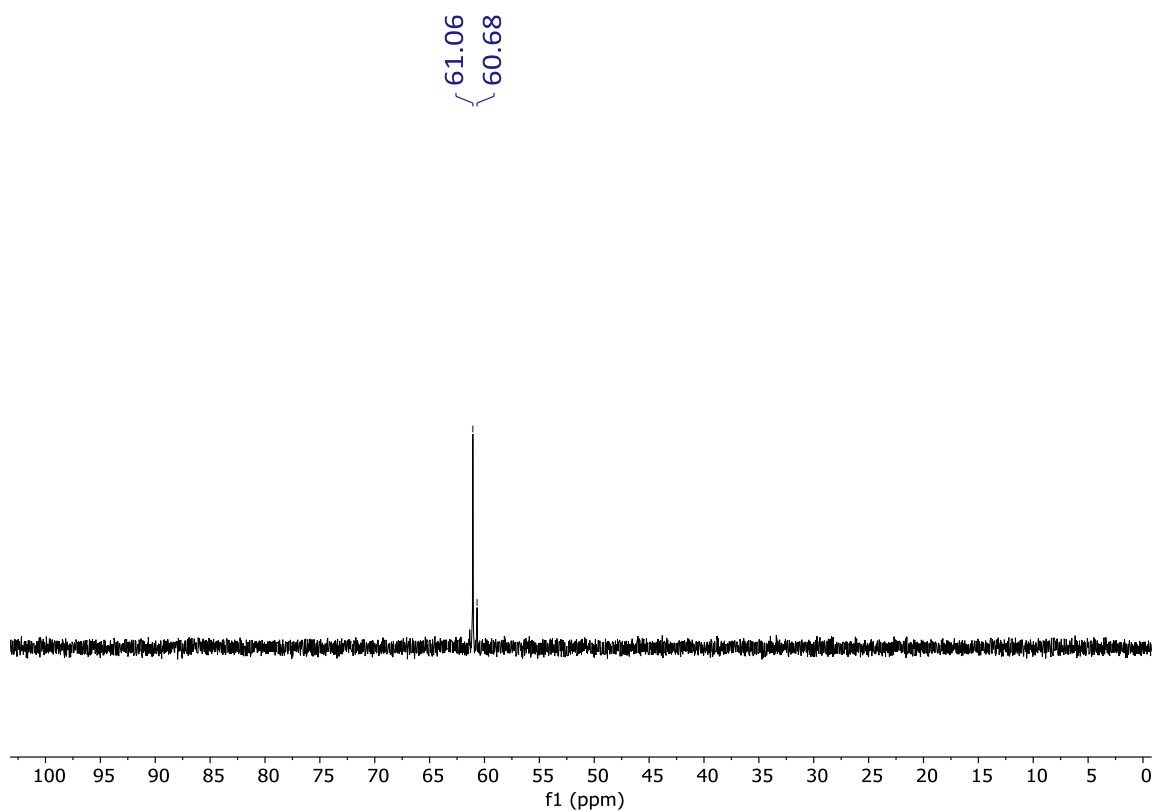

Figure S 59.  $^{31}\text{P}$   $\{^1\text{H}\}$  NMR ( $\text{CDCl}_3$ ) of compound 5d,  $[\text{Ni}(\text{S}_2\text{P}=\text{O})(\text{OEt})(\text{CNAr})\{\text{C}(\text{NHAr})(\text{NEt}_2)\}]$

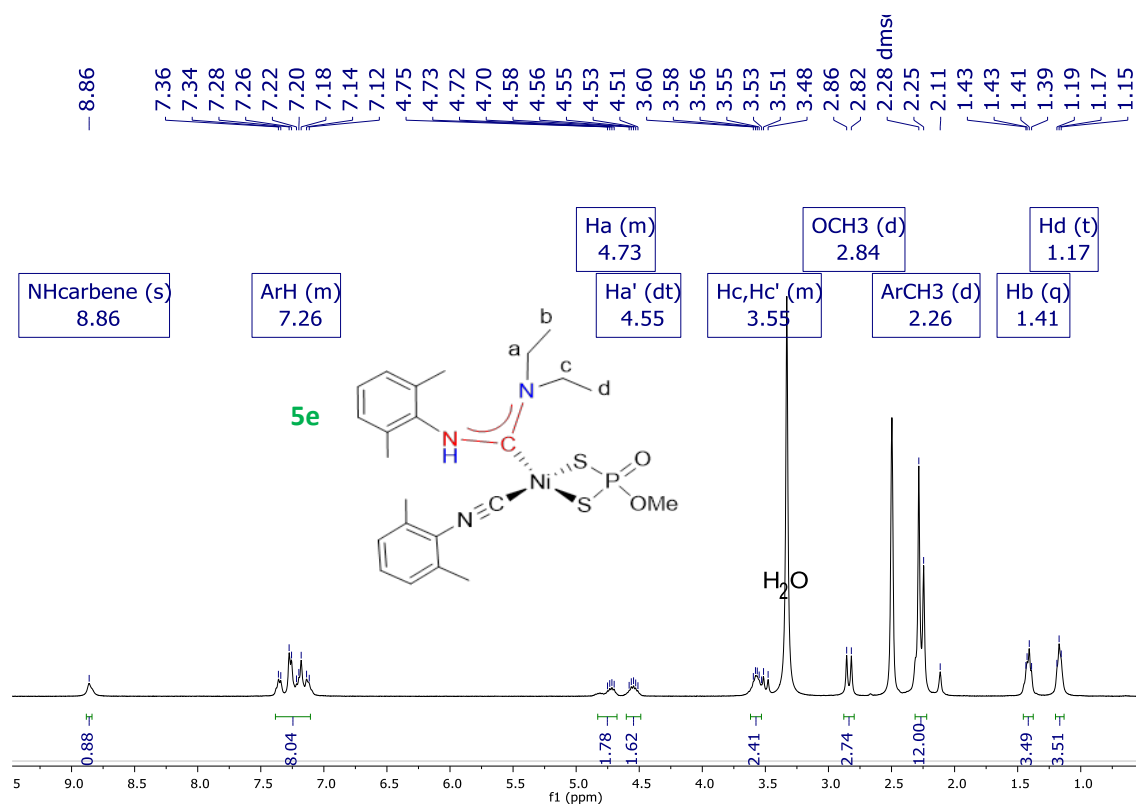

Figure S 60. <sup>1</sup>H NMR (DMSO-*d*<sub>6</sub>) of compound **5e**, [Ni(S<sub>2</sub>P(=O)(OMe)(CNXyl){C(NHXyl)(NEt<sub>2</sub>)}]

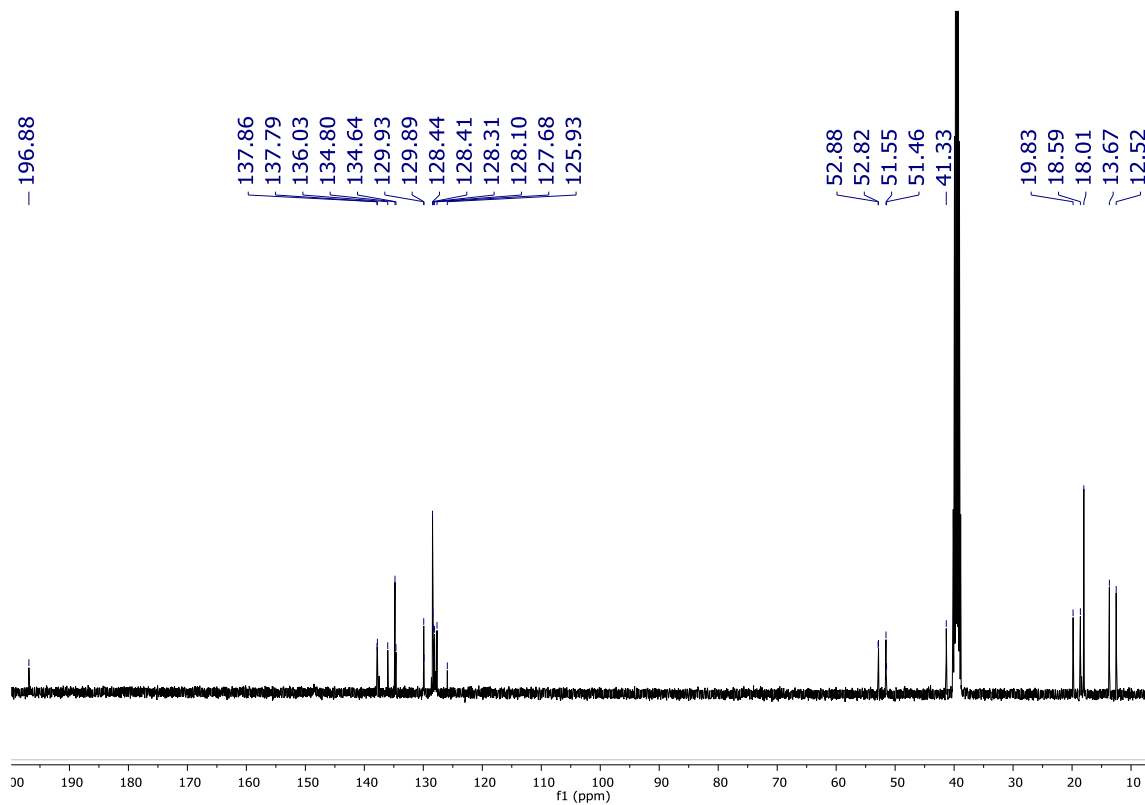

Figure S 61. <sup>13</sup>C{<sup>1</sup>H} NMR (DMSO-*d*<sub>6</sub>) of compound **5e**, [Ni(S<sub>2</sub>P(=O)(OMe)(CNXyl){C(NHXyl)(NEt<sub>2</sub>)}]

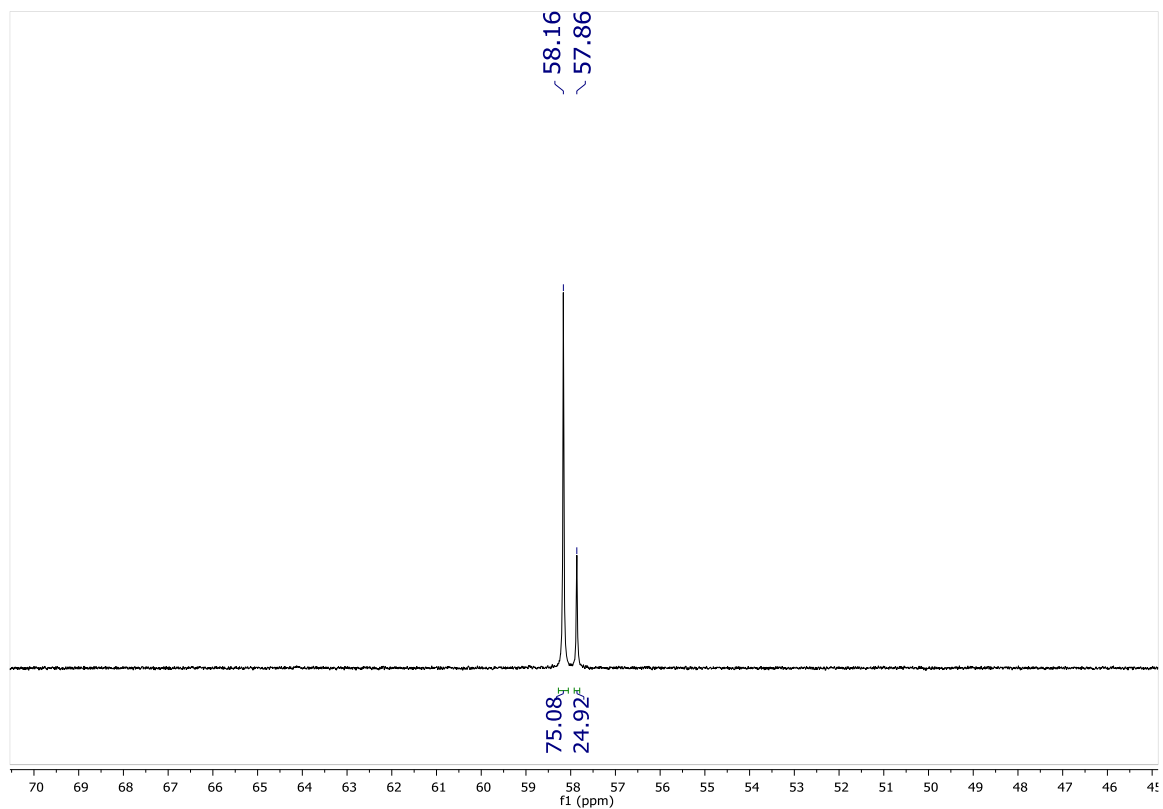

Figure S 62.  $^{31}\text{P}\{^1\text{H}\}$  NMR (DMSO- $d_6$ ) of compound 5e,  $[\text{Ni}(\text{S}_2\text{P}(\text{=O})(\text{OMe})(\text{CNXyl})\{\text{C}(\text{NHXyl})(\text{NEt}_2)\})]$ .

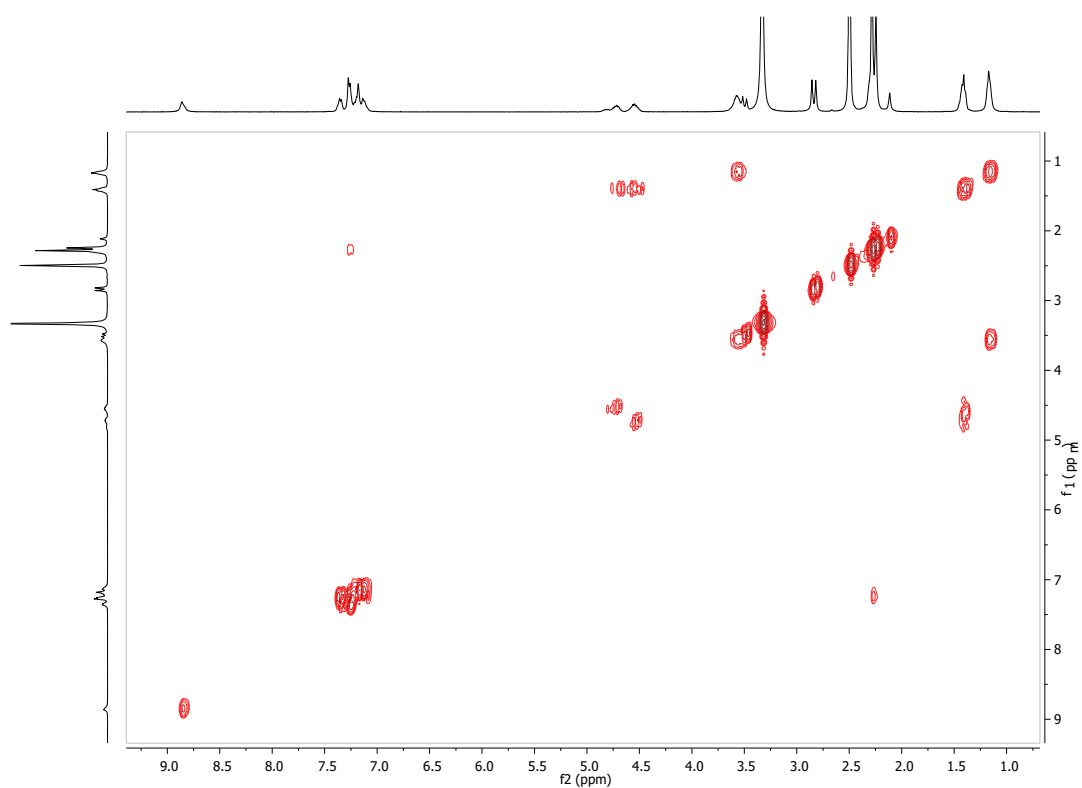

Figure S 63.  $^1\text{H}$ - $^1\text{H}$  COSY NMR (DMSO- $d_6$ ) of compound 5e,  $[\text{Ni}(\text{S}_2\text{P}(\text{=O})(\text{OMe})(\text{CNXyl})\{\text{C}(\text{NHXyl})(\text{NEt}_2)\})]$ .

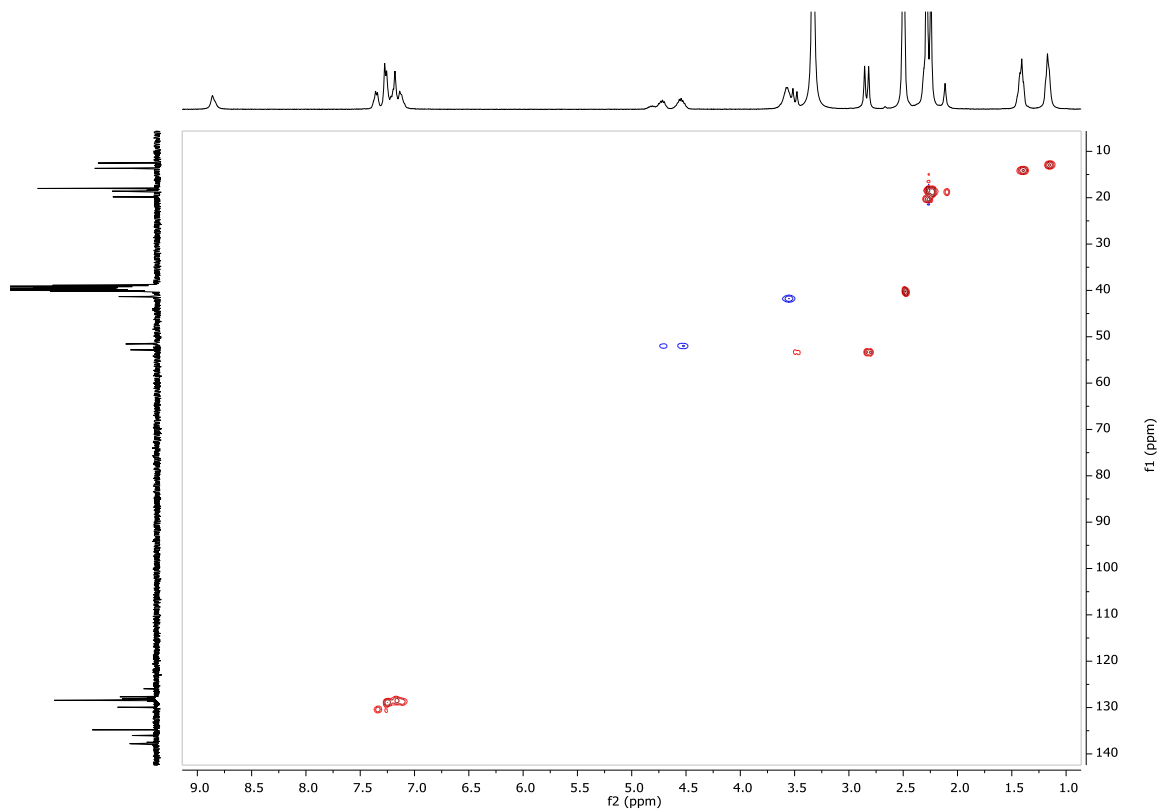

Figure S 64.  $^1\text{H}$ - $^{13}\text{C}\{^1\text{H}\}$  HSQC NMR (DMSO-*d*6) of compound 5e,  $[\text{Ni}(\text{S}_2\text{P}(\text{=O})(\text{OMe})(\text{CNXyl})\{\text{C}(\text{NHXyl})(\text{NEt}_2)\})]$ .

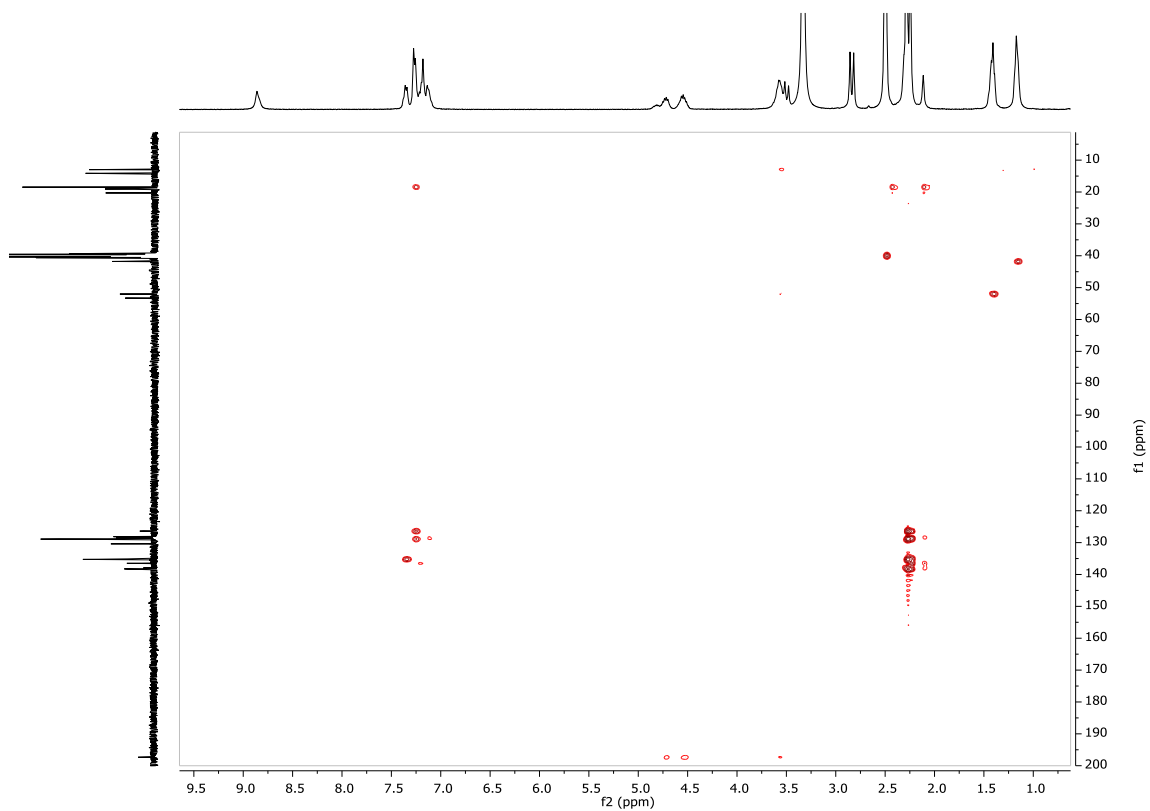

Figure S 65.  $^1\text{H}$ - $^{13}\text{C}\{^1\text{H}\}$  HMBC NMR (DMSO-*d*6) of compound 5e,  $[\text{Ni}(\text{S}_2\text{P}(\text{=O})(\text{OMe})(\text{CNXyl})\{\text{C}(\text{NHXyl})(\text{NEt}_2)\})]$ .

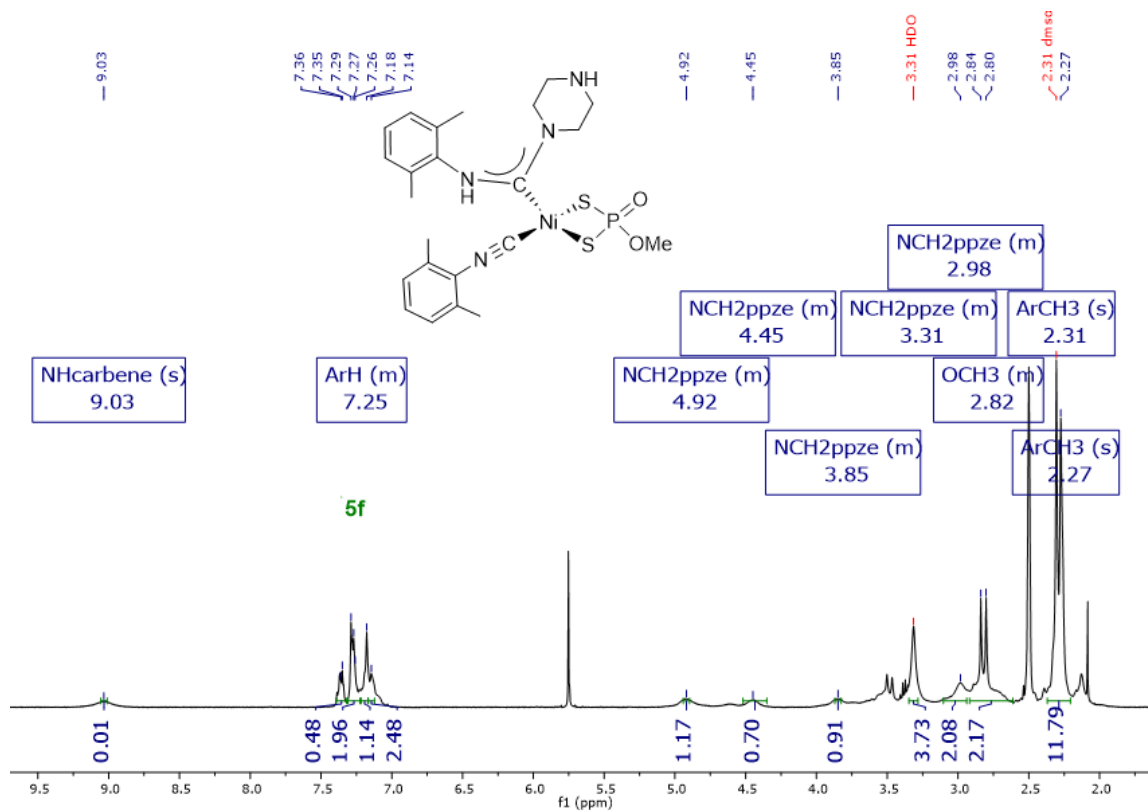

Figure S 66.  $^1\text{H}$  NMR (DMSO- $d_6$ ) of compound 5f,  $[\text{Ni}(\text{S}_2\text{P}(\text{O})(\text{OMe})(\text{CNXyl})\{\text{C}(\text{NHXyl})(\text{Nppze})\})]$ .

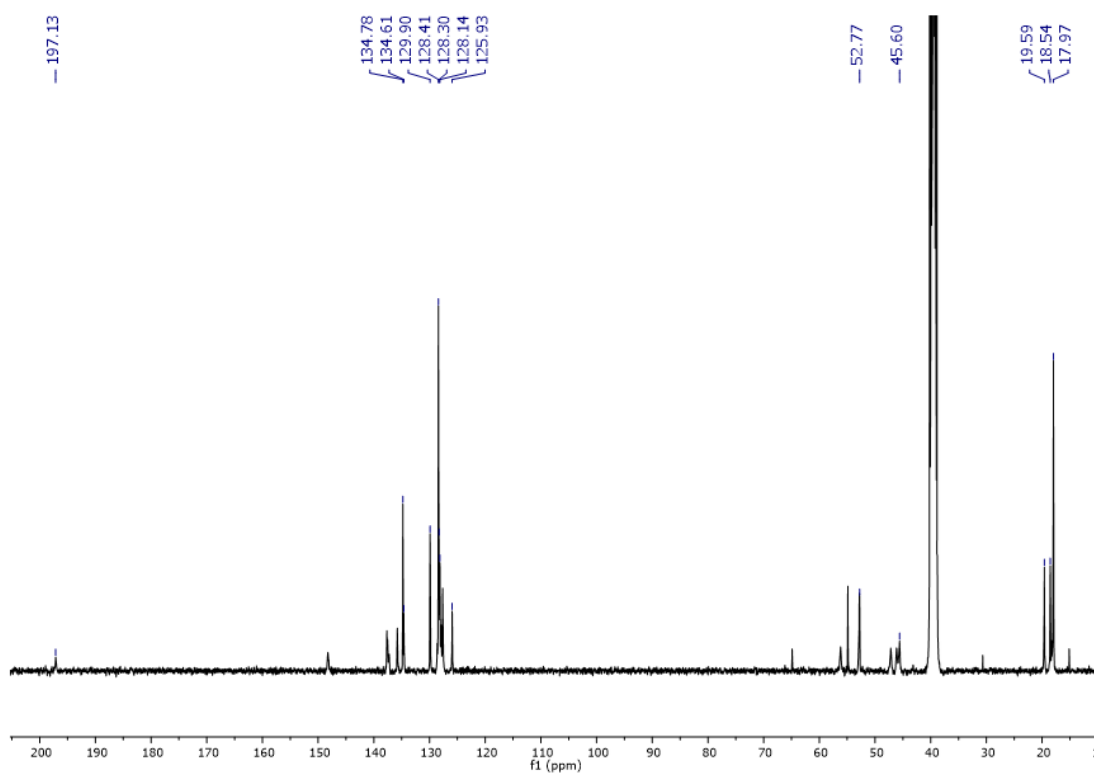

Figure S 67.  $^{13}\text{C}\{^1\text{H}\}$  NMR (DMSO- $d_6$ ) of compound 5f,  $[\text{Ni}(\text{S}_2\text{P}(\text{O})(\text{OMe})(\text{CNXyl})\{\text{C}(\text{NHXyl})(\text{Nppze})\})]$ .

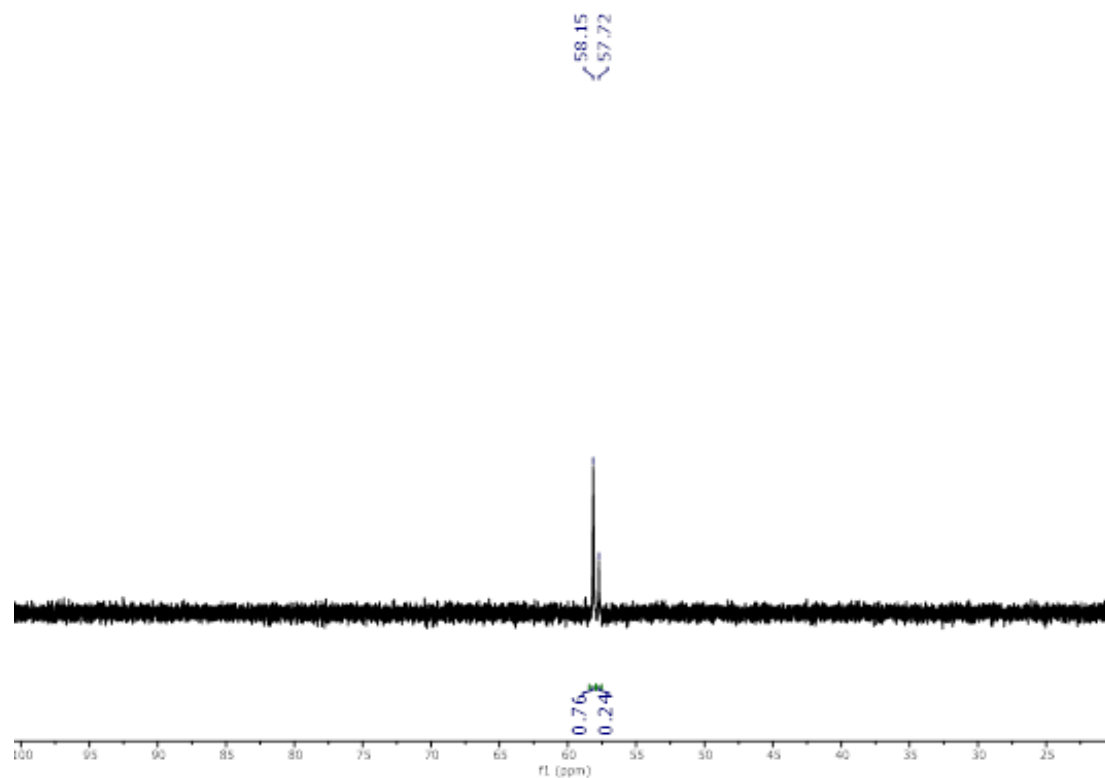

Figure S 68.  $^{31}\text{P}\{^1\text{H}\}$  NMR (DMSO-*d*6) of compound 5f,  $[\text{Ni}(\text{S}_2\text{P}(=\text{O})(\text{OMe})(\text{CNXyl})\{\text{C}(\text{NHXyl})(\text{Nppze})\})]$ .

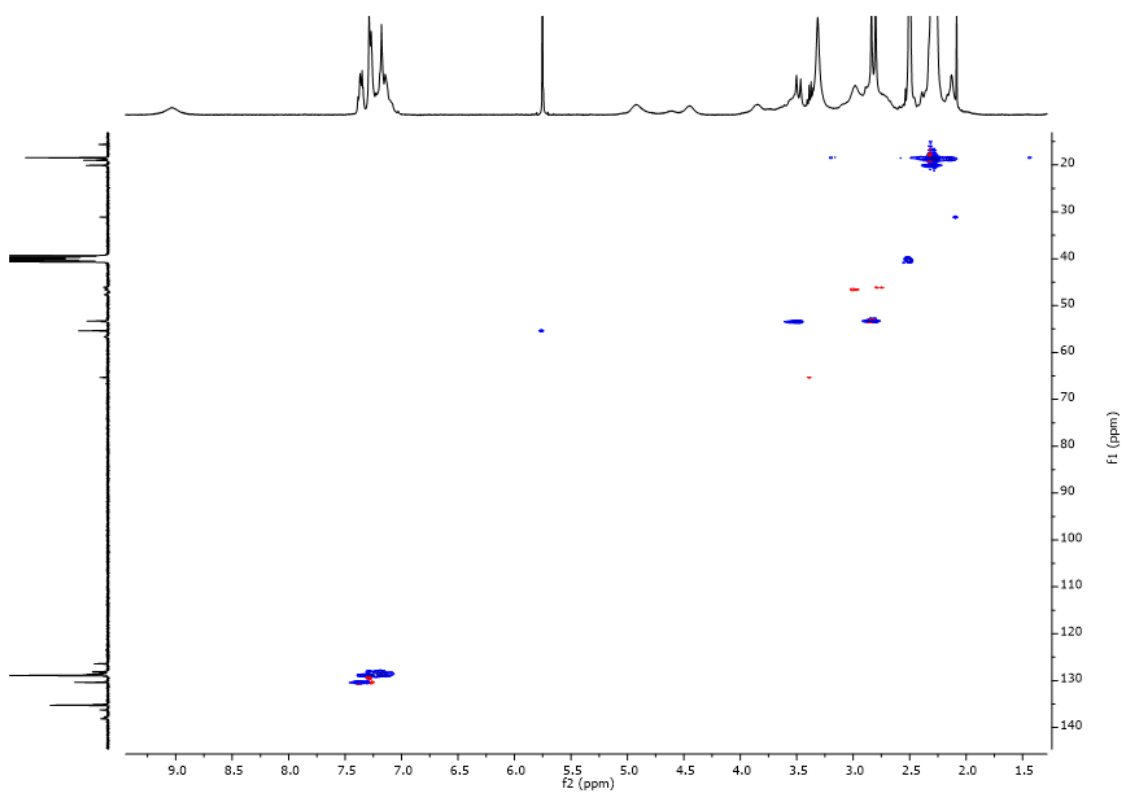

Figure S 69.  $^1\text{H}$ - $^{13}\text{C}\{^1\text{H}\}$  HSQC NMR (DMSO-*d*6) of compound 5f,  $[\text{Ni}(\text{S}_2\text{P}(=\text{O})(\text{OMe})(\text{CNXyl})\{\text{C}(\text{NHXyl})(\text{Nppze})\})]$ .



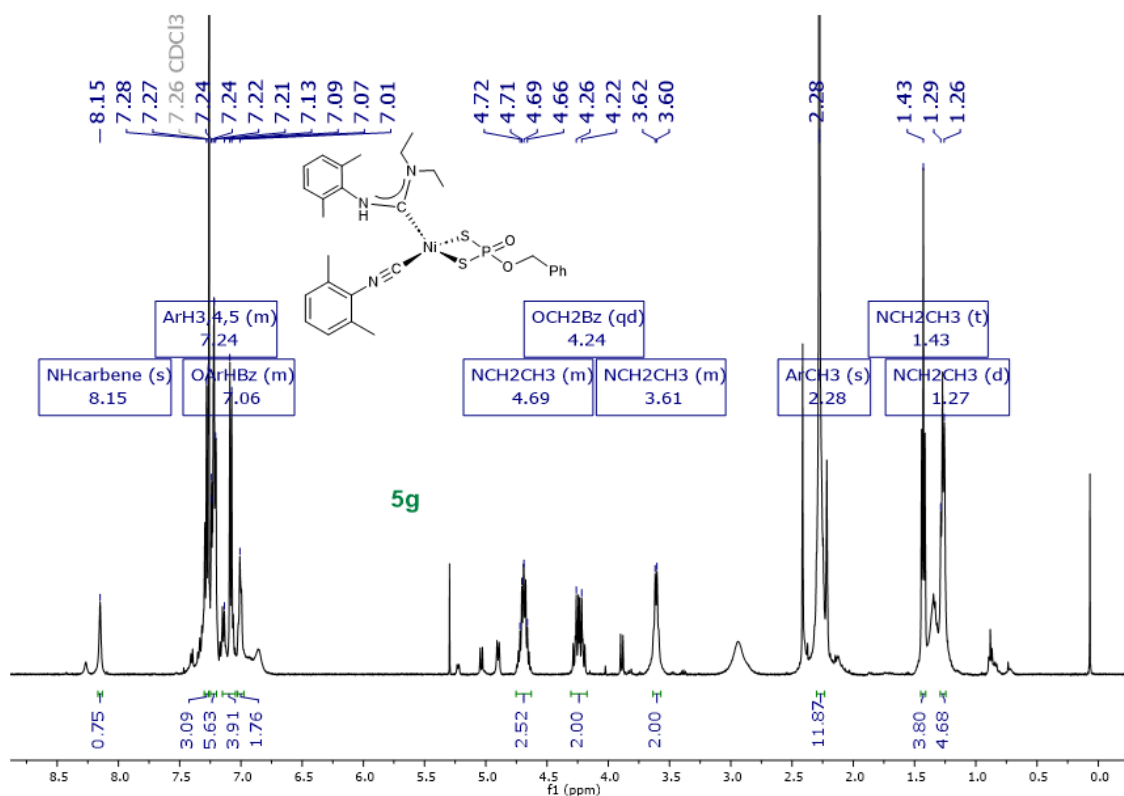

Figure S 70. <sup>1</sup>H NMR (CDCl<sub>3</sub>) of compound 5g, [Ni{S<sub>2</sub>P(=O)(OBz)}(CNXyl){C(NHXyl)(NEt<sub>2</sub>

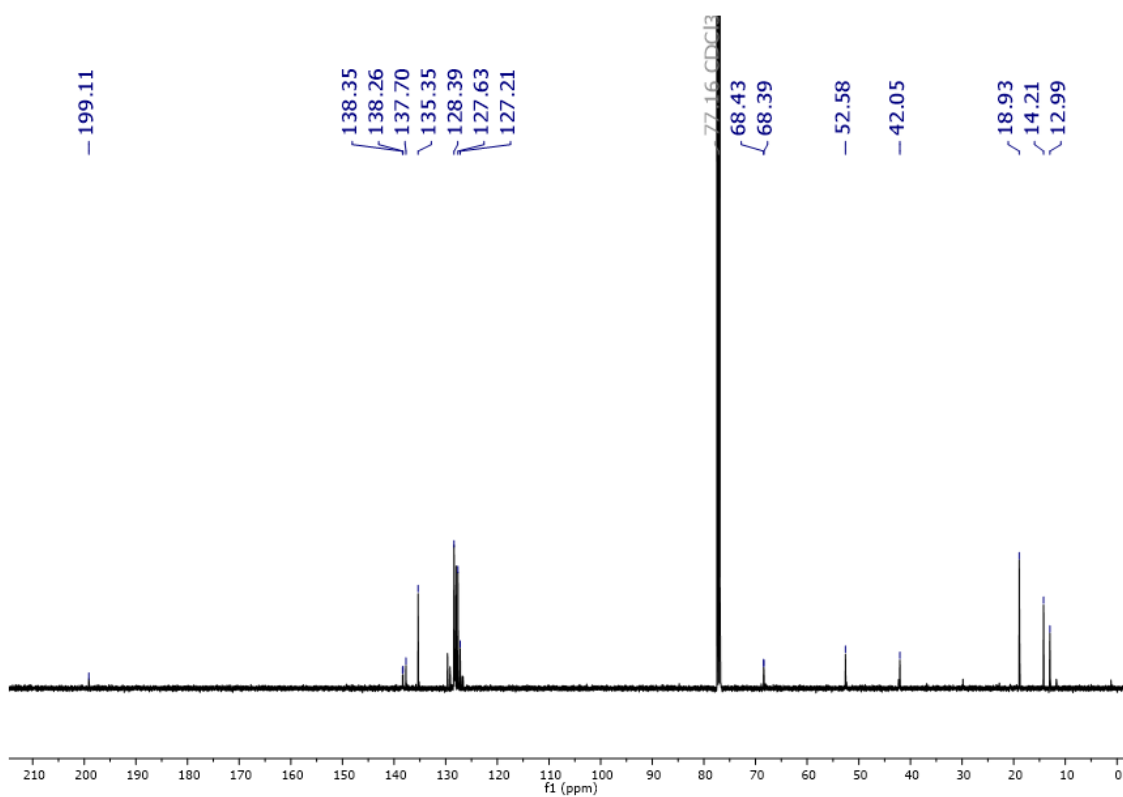

Figure S 71. <sup>13</sup>C{<sup>1</sup>H} NMR (CDCl<sub>3</sub>) of compound 5g, [Ni{S<sub>2</sub>P(=O)(OBz)}(CNXyl){C(NHXyl)(NEt<sub>2</sub>

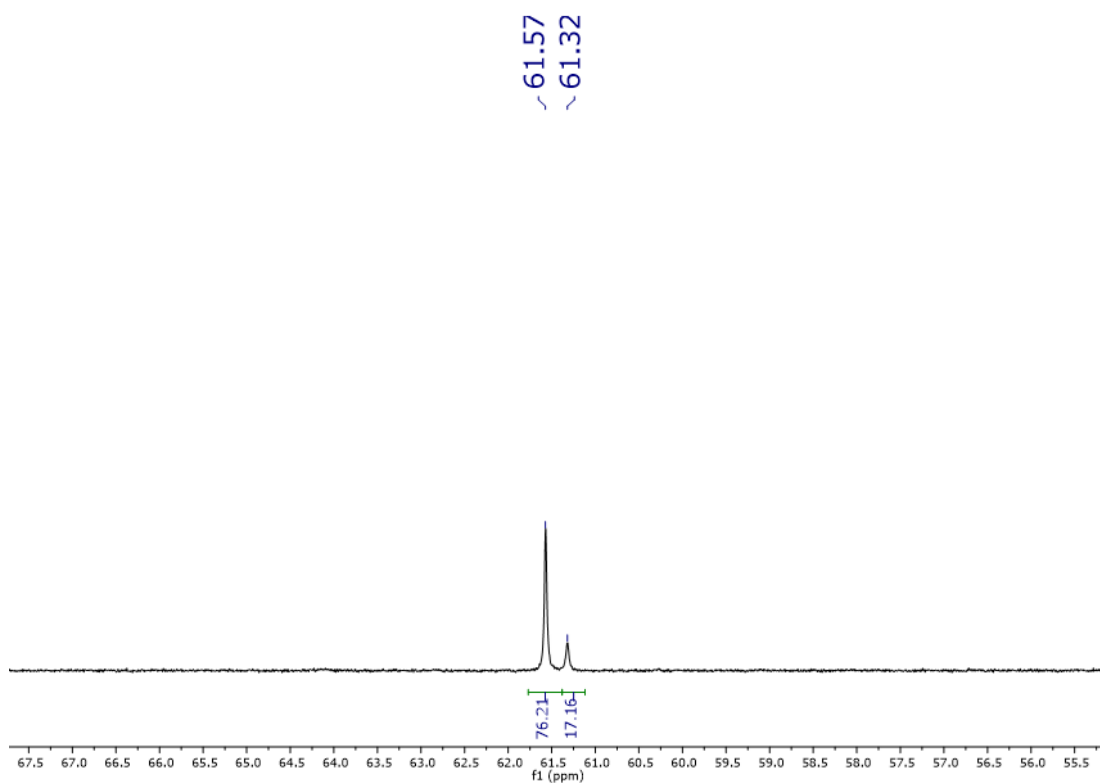

Figure S 72.  $^{31}\text{P}\{^1\text{H}\}$  NMR (DMSO-*d*<sub>6</sub>) of compound 5g,  $[\text{Ni}\{\text{S}_2\text{P}(=\text{O})(\text{OBz})\}\{\text{CNXyl}\}\{\text{C}(\text{NHXyl})(\text{NEt}_2)\}]$ .

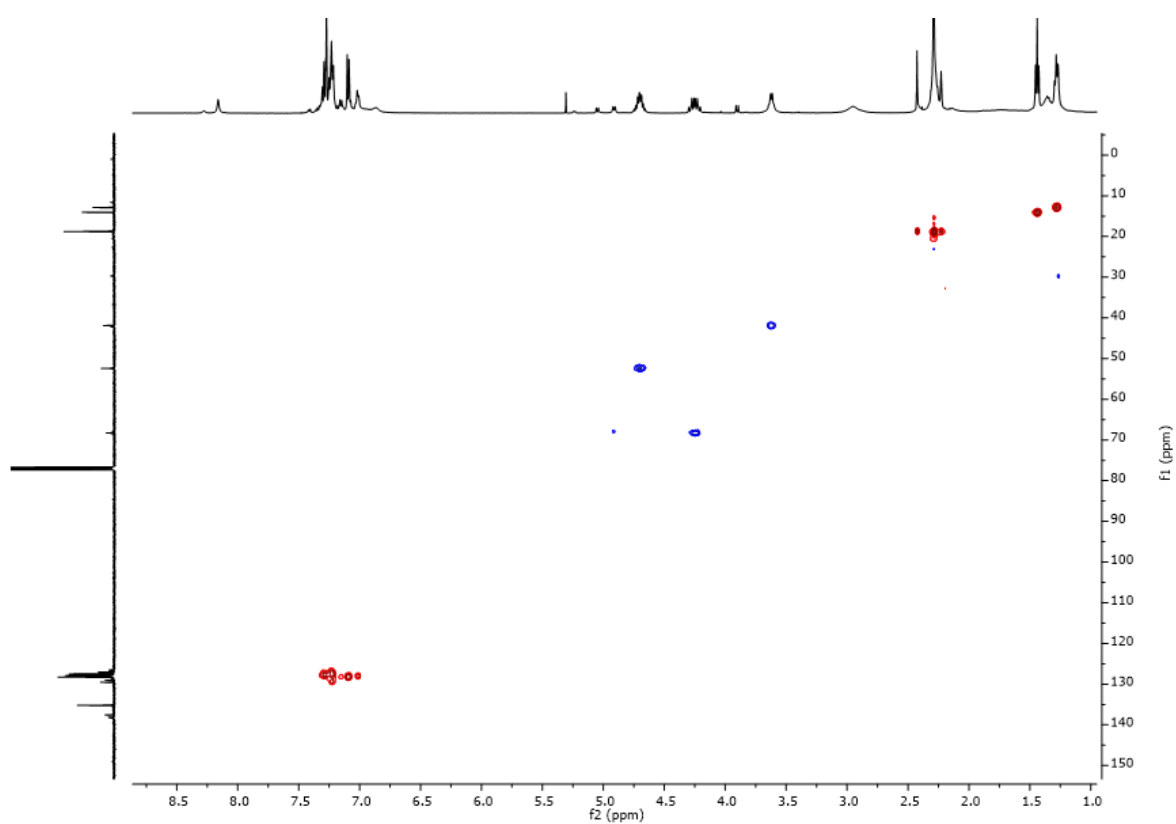

Figure S 73.  $^1\text{H}\text{-}^{13}\text{C}\{^1\text{H}\}$  HSQC NMR (DMSO-*d*<sub>6</sub>) of compound 5g,  $[\text{Ni}\{\text{S}_2\text{P}(=\text{O})(\text{OBz})\}\{\text{CNXyl}\}\{\text{C}(\text{NHXyl})(\text{NEt}_2)\}]$ .

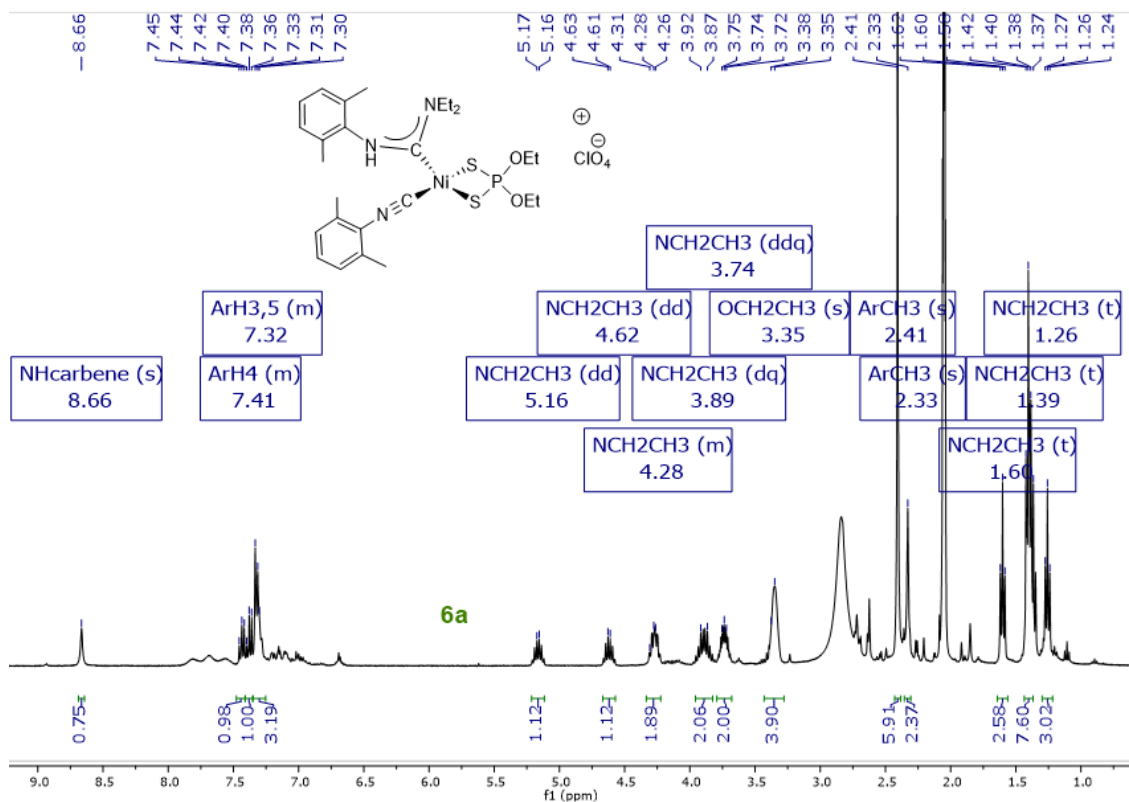

Figure S 74.  $^1\text{H}$  NMR ( $\text{Me}_2\text{CO}-d_6$ ) of compound 6a,  $[\text{Ni}(\text{S}_2\text{P}(\text{OEt})_2(\text{CNXyl}))\{\text{C}(\text{NHXyl})(\text{NEt}_2)\}]\text{ClO}_4$ .

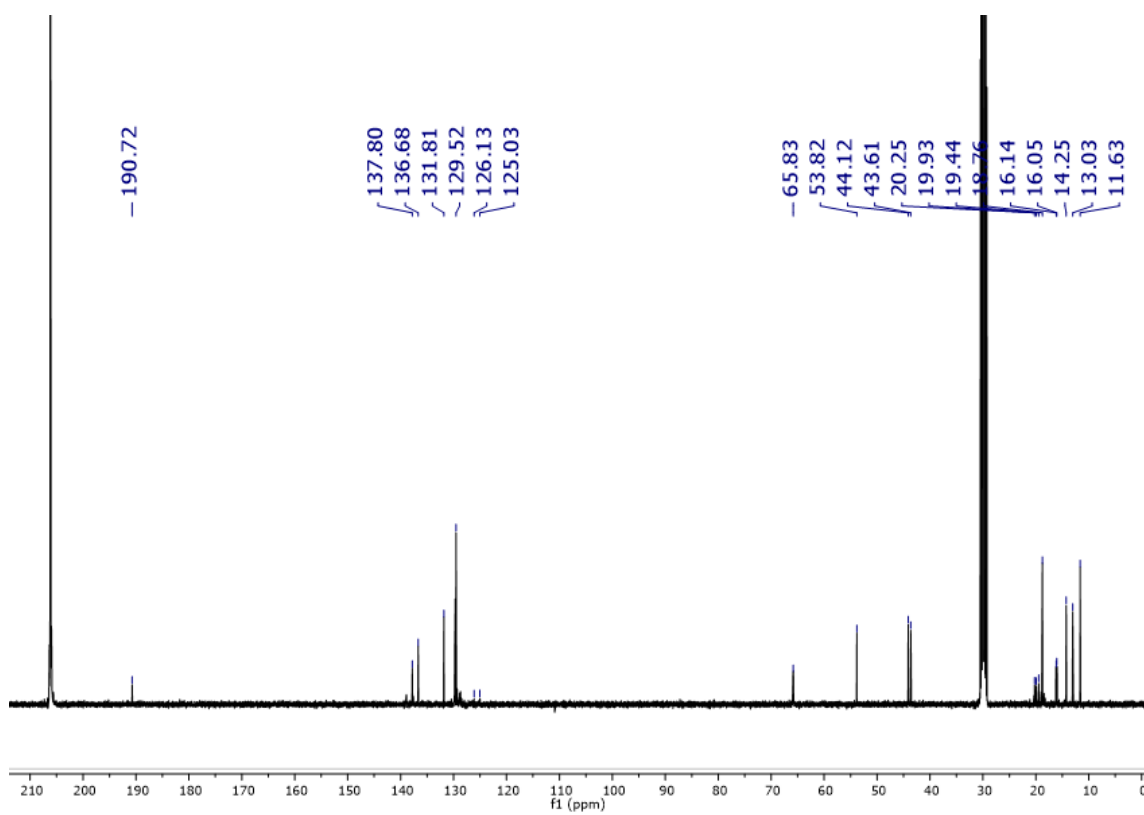

Figure S 75.  $^{13}\text{C}\{^1\text{H}\}$  NMR ( $\text{Me}_2\text{CO}-d_6$ ) of compound 6a,  $[\text{Ni}(\text{S}_2\text{P}(\text{OEt})_2(\text{CNXyl}))\{\text{C}(\text{NHXyl})(\text{NEt}_2)\}]\text{ClO}_4$ .

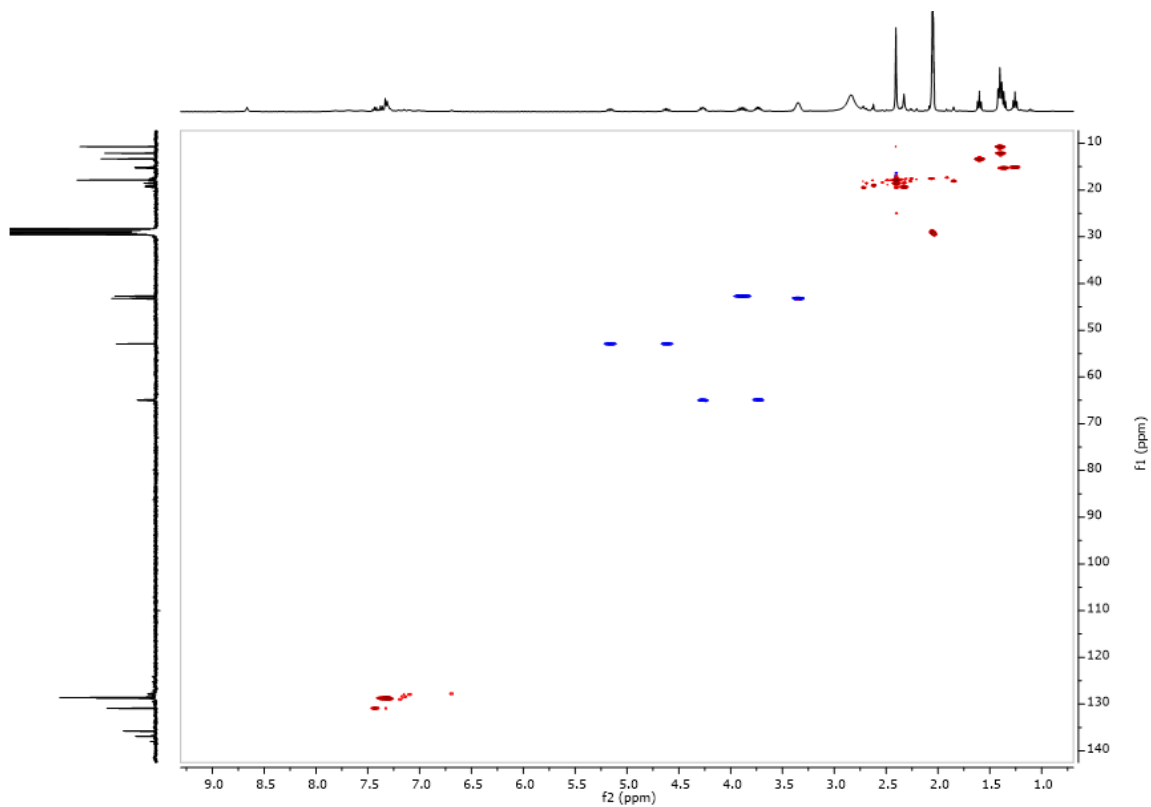

Figure S 76.  $^1\text{H}$ - $^{13}\text{C}\{^1\text{H}\}$  HSQC NMR ( $\text{Me}_2\text{CO-d}_6$ ) of compound 6a,  $[\text{Ni}(\text{S}_2\text{P}(\text{OEt})_2(\text{CNXy}))\{\text{C}(\text{NHXyl})(\text{NEt}_2)\}]\text{ClO}_4$ .

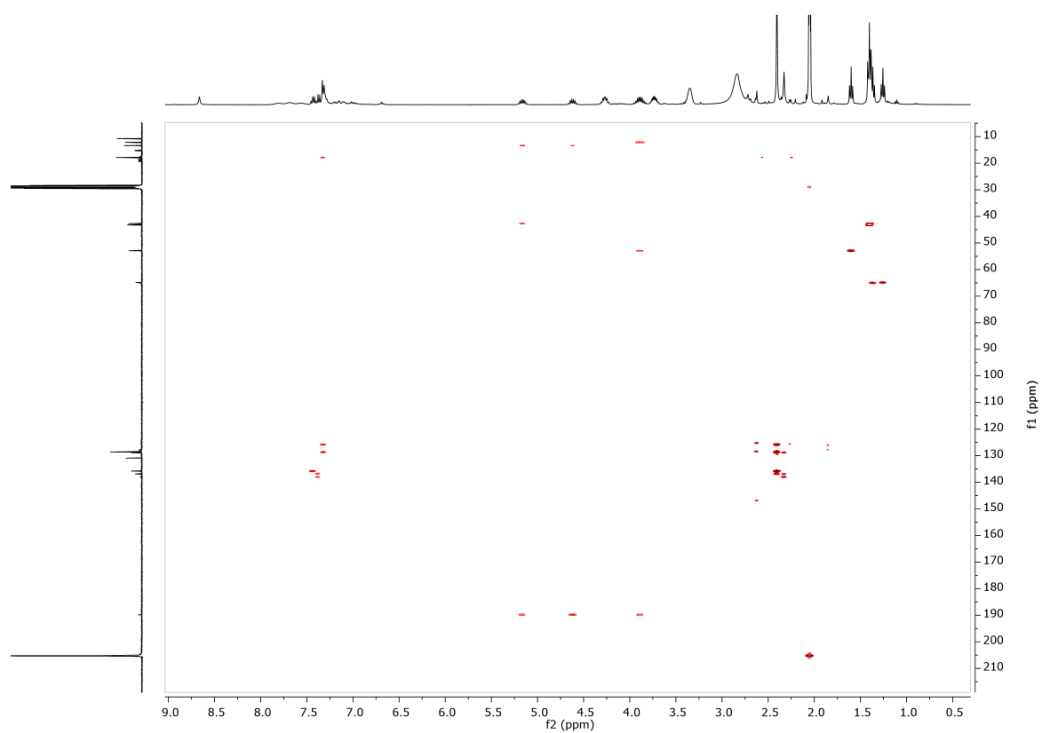

Figure S 77.  $^1\text{H}$ - $^{13}\text{C}\{^1\text{H}\}$  HMBC NMR ( $\text{Me}_2\text{CO-d}_6$ ) of compound 6a,  $[\text{Ni}(\text{S}_2\text{P}(\text{OEt})_2(\text{CNXy}))\{\text{C}(\text{NHXyl})(\text{NEt}_2)\}]\text{ClO}_4$ .

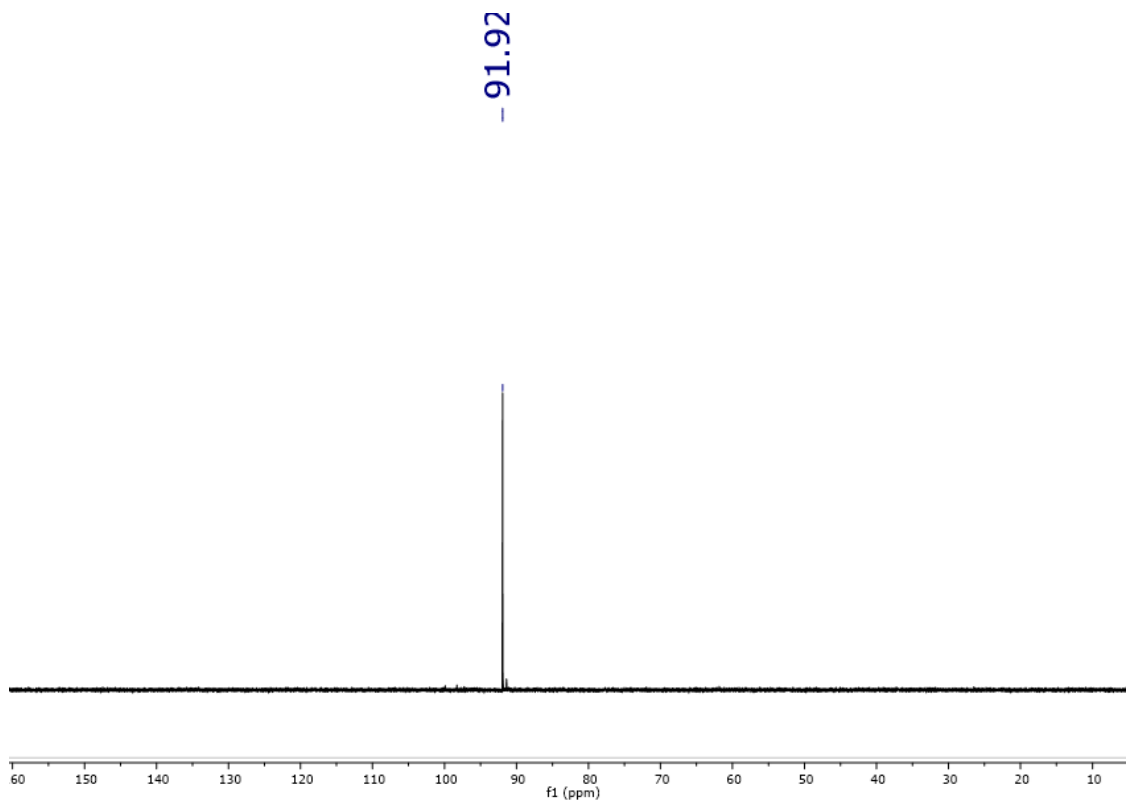

Figure S 78.  $^{31}\text{P}\{^1\text{H}\}$  NMR ( $\text{Me}_2\text{CO-d}_6$ ) of compound 6a,  $[\text{Ni}(\text{S}_2\text{P}(\text{OEt})_2(\text{CNXyl})\{\text{C}(\text{NHXyl})(\text{NEt}_2)\})]\text{ClO}_4$ .

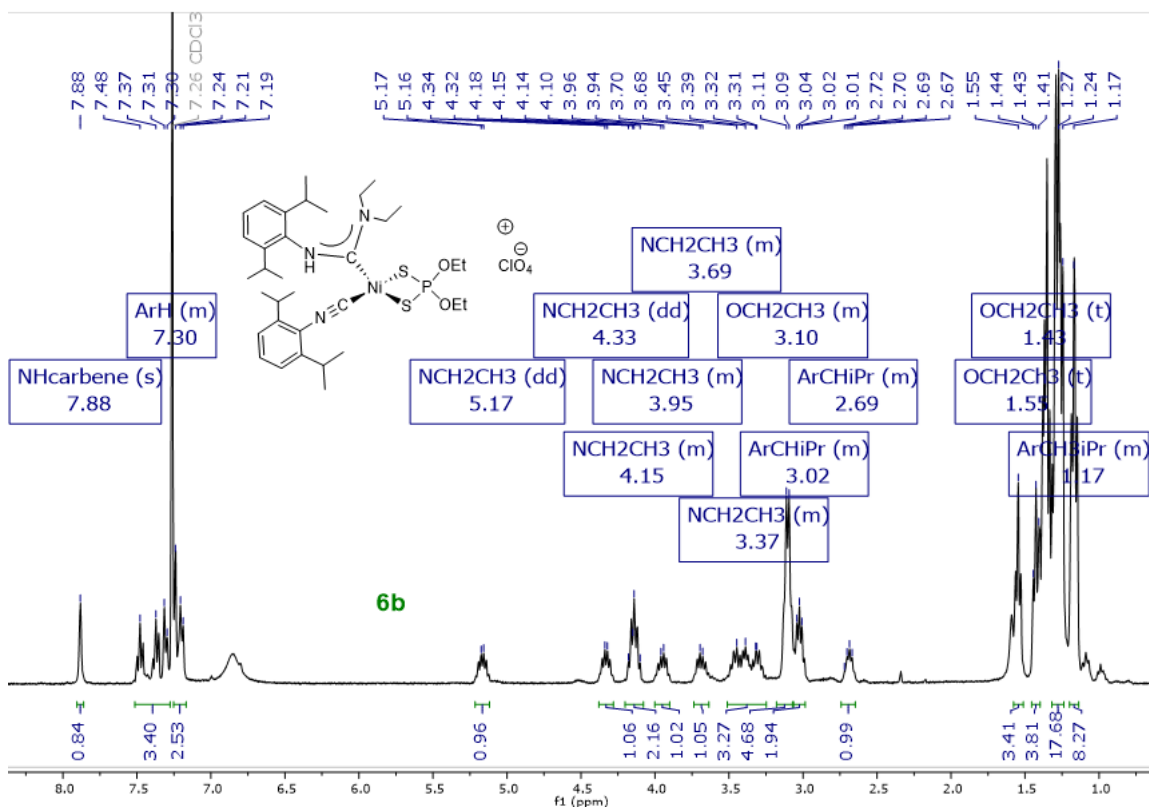

Figure S 79.  $^1\text{H}$  NMR ( $\text{CDCl}_3$ ) of compound 6b,  $[\text{Ni}(\text{S}_2\text{P}(\text{OEt})_2(\text{CNAr})\{\text{C}(\text{NHAr})(\text{NEt}_2)\})]\text{ClO}_4$ .

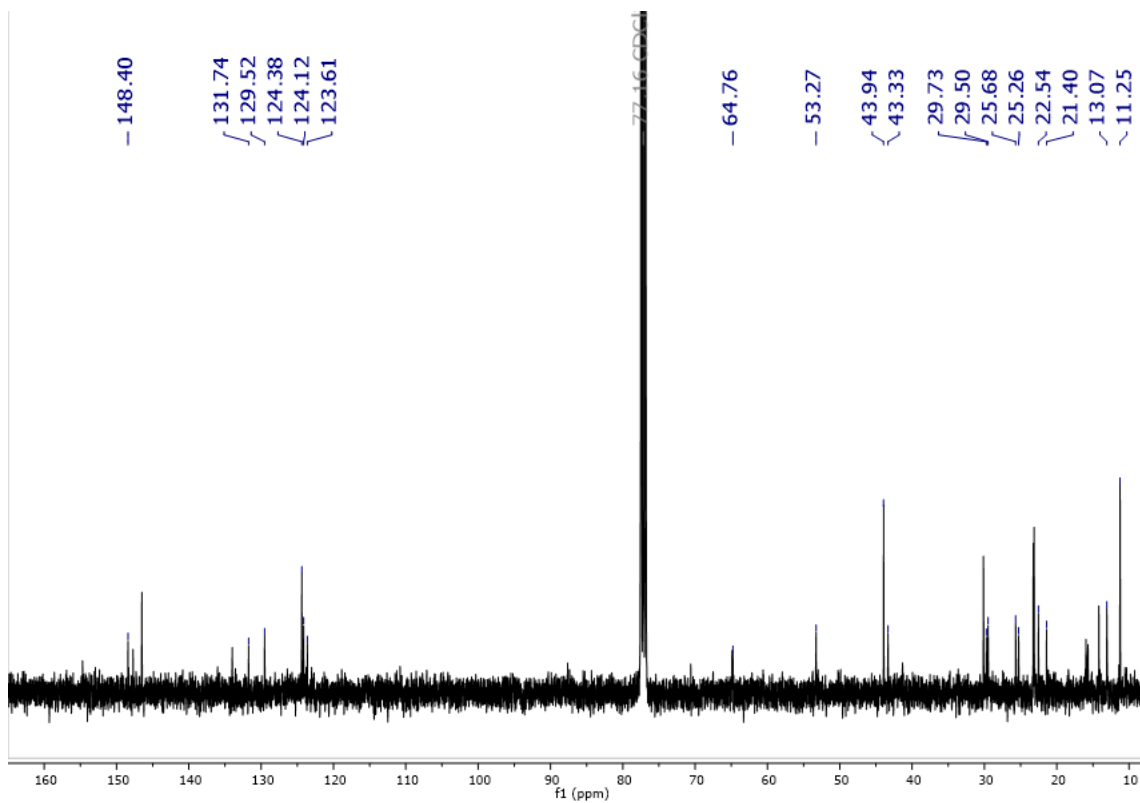

Figure S 80.  $^{13}\text{C}\{^1\text{H}\}$  NMR ( $\text{CDCl}_3$ ) of compound 6b,  $[\text{Ni}(\text{S}_2\text{P}(\text{OEt})_2(\text{CNAr})\{\text{C}(\text{NHar})(\text{NEt}_2)\})]\text{ClO}_4$ .

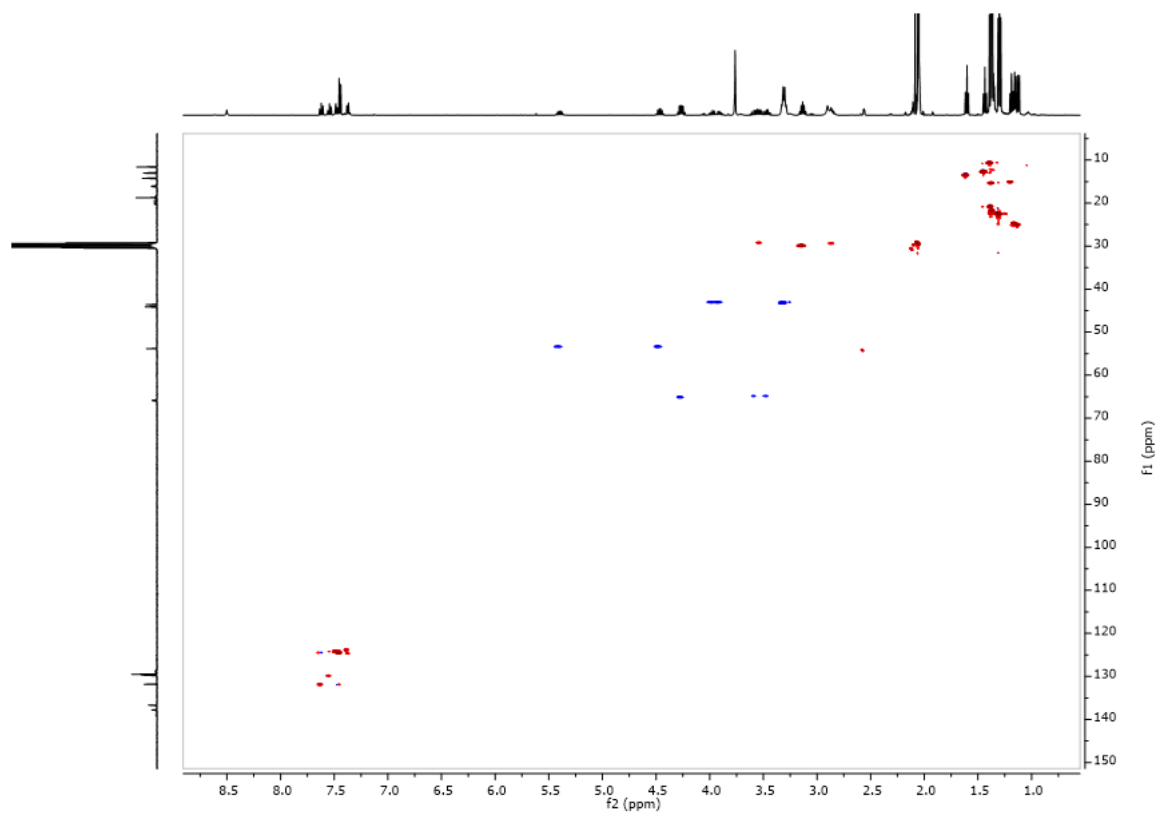

Figure S 81.  $^1\text{H}\text{-}^{13}\text{C}\{^1\text{H}\}$  HSQC NMR ( $\text{Ac-d}_6$ ) of compound 6b,  $[\text{Ni}(\text{S}_2\text{P}(\text{OEt})_2(\text{CNAr})\{\text{C}(\text{NHar})(\text{NEt}_2)\})]\text{ClO}_4$ .

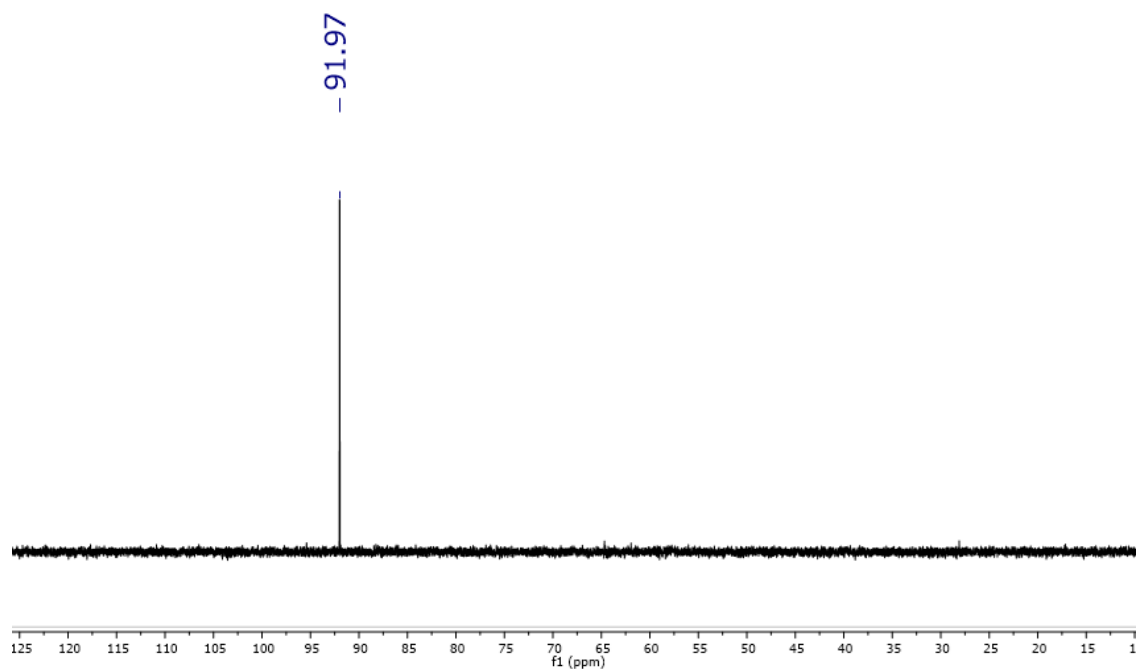

Figure S 82.  $^{31}\text{P}\{^1\text{H}\}$  NMR ( $\text{CDCl}_3$ ) of compound 6b,  $[\text{Ni}(\text{S}_2\text{P}(\text{OEt})_2)(\text{CNAr})\{\text{C}(\text{NHAr})(\text{NEt}_2)\}]\text{ClO}_4$

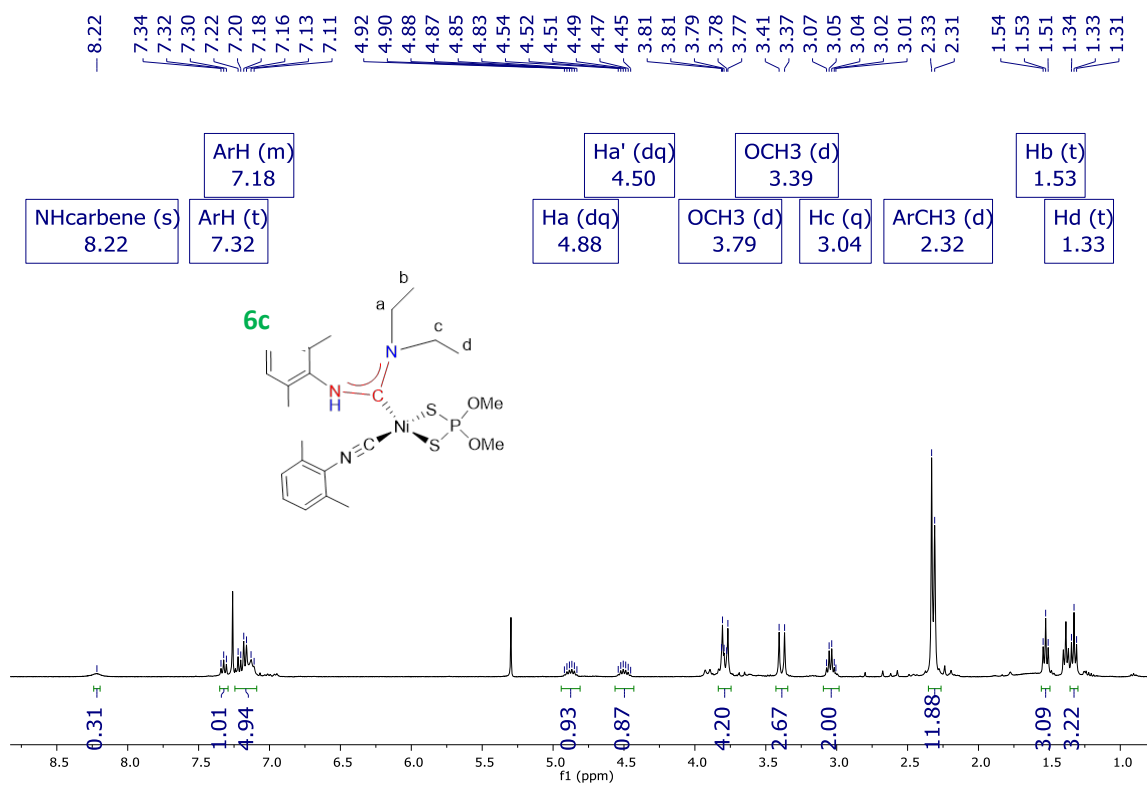

Figure S 83.  $^1\text{H}$  NMR ( $\text{CDCl}_3$ ) of compound 6c,  $[\text{Ni}(\text{S}_2\text{P}(\text{OMe})_2)(\text{CNXyl})\{\text{C}(\text{NHXyl})(\text{NEt}_2)\}]\text{ClO}_4$ .

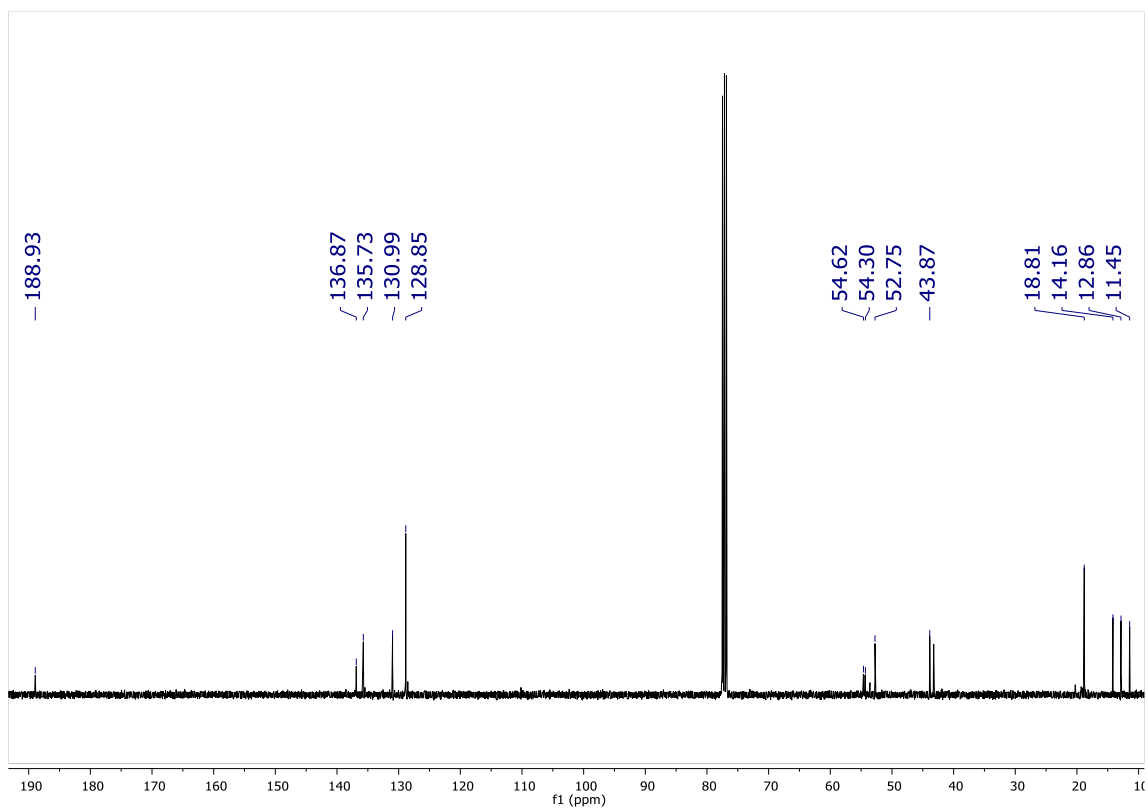

Figure S 84.  $^{13}\text{C}\{^1\text{H}\}$  NMR ( $\text{CDCl}_3$ ) of compound 6c,  $[\text{Ni}(\text{S}_2\text{P}(\text{OMe})_2(\text{CNXyl})\{\text{C}(\text{NHXyl})(\text{NEt}_2)\})]\text{ClO}_4$ .

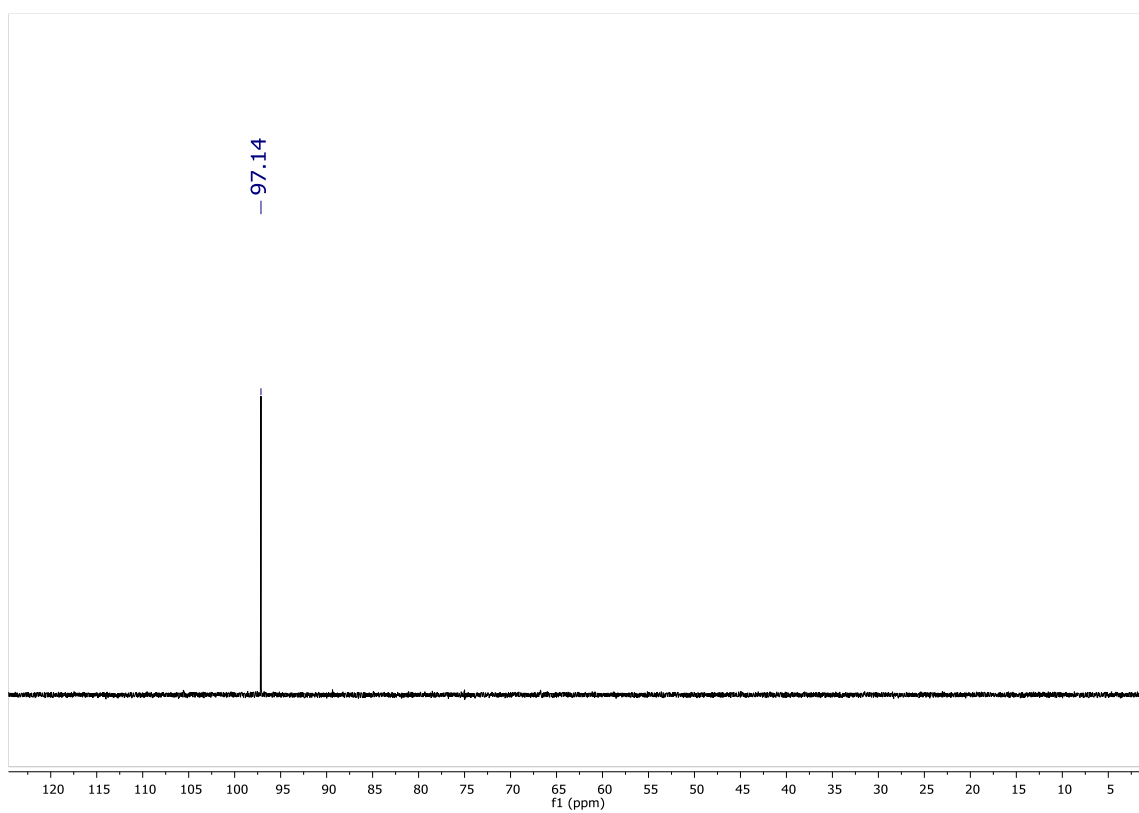

Figure S 85.  $^{31}\text{P}\{^1\text{H}\}$  NMR ( $\text{CDCl}_3$ ) of compound 6c,  $[\text{Ni}(\text{S}_2\text{P}(\text{OMe})_2(\text{CNXyl})\{\text{C}(\text{NHXyl})(\text{NEt}_2)\})]\text{ClO}_4$ .



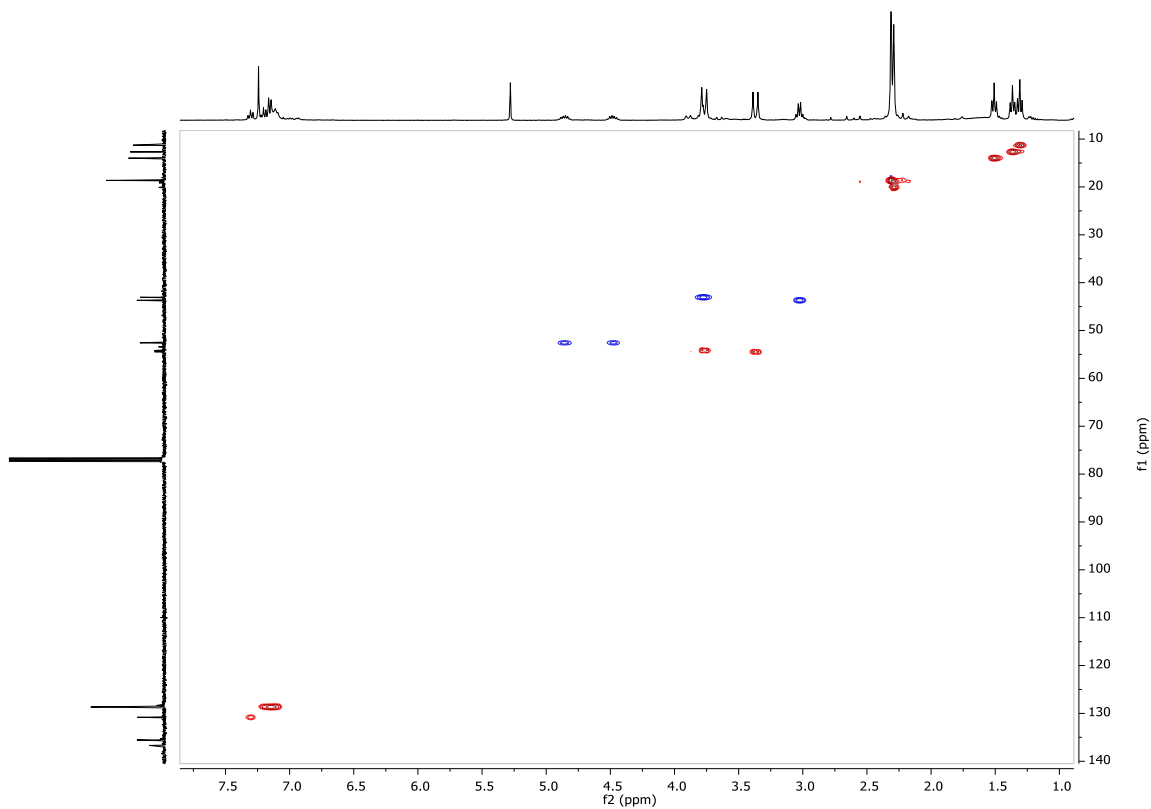

Figure S 86.  $^1\text{H}$ - $^{13}\text{C}\{^1\text{H}\}$  HSQC NMR ( $\text{CDCl}_3$ ) of compound 6c,  $[\text{Ni}(\text{S}_2\text{P}(\text{OMe})_2(\text{CNXyl}))\{\text{C}(\text{NHXyl})(\text{NEt}_2)\}]\text{ClO}_4$ .

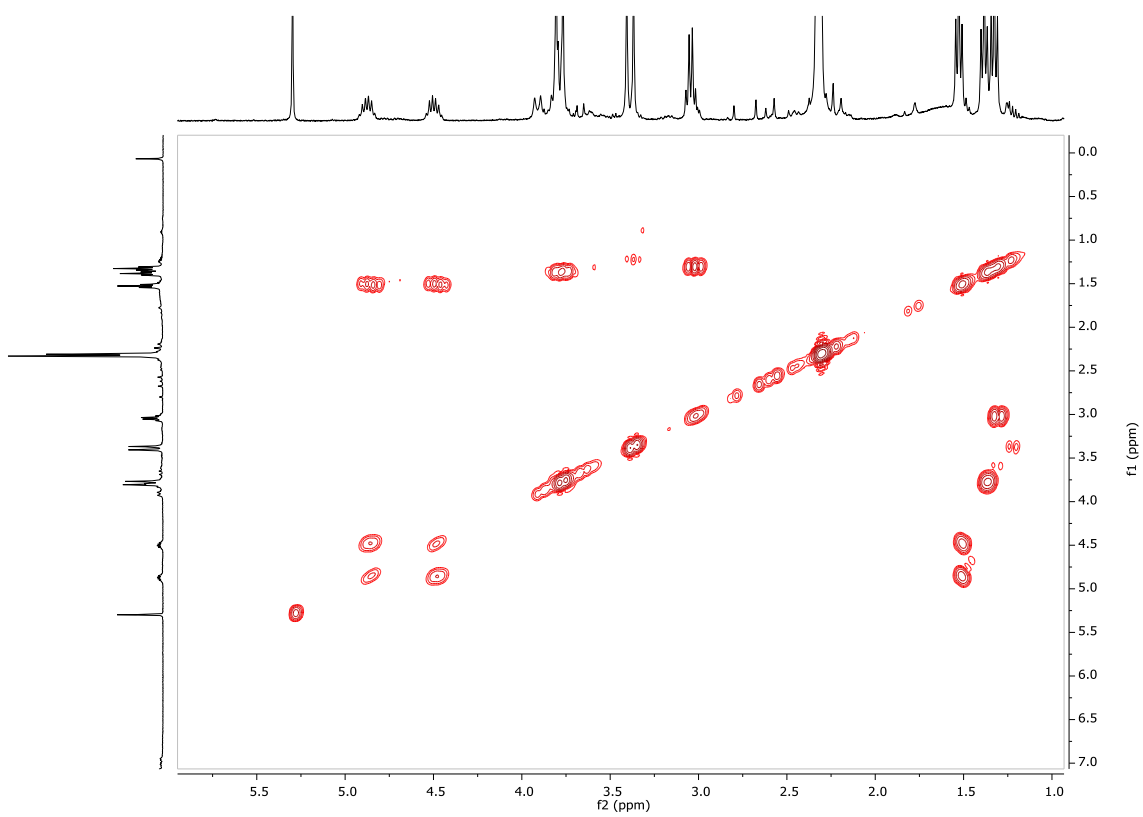

Figure S 87.  $^1\text{H}$ - $^1\text{H}$  COSY NMR ( $\text{CDCl}_3$ ) of compound 6c,  $[\text{Ni}(\text{S}_2\text{P}(\text{OMe})_2(\text{CNXyl}))\{\text{C}(\text{NHXyl})(\text{NEt}_2)\}]\text{ClO}_4$ .

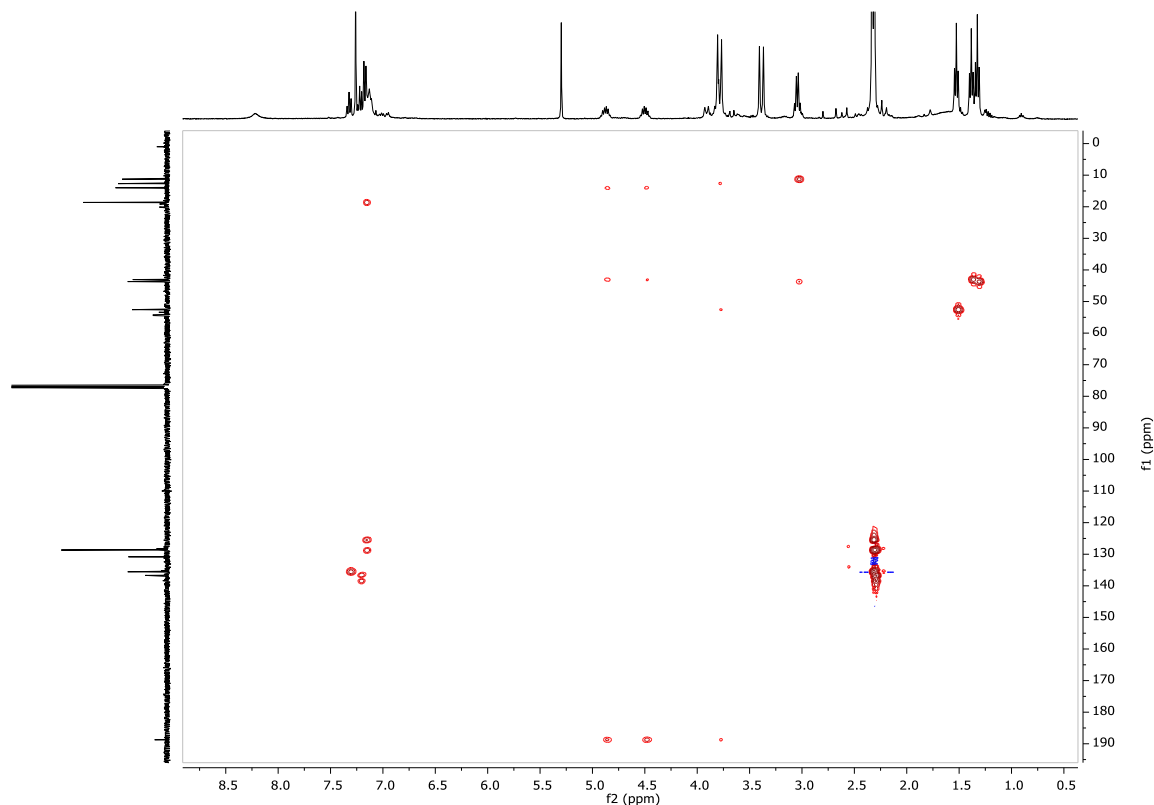

Figure S 88.  $^1\text{H}$ - $^{13}\text{C}\{^1\text{H}\}$  HMBC NMR ( $\text{CDCl}_3$ ) of compound 6c,  $[\text{Ni}(\text{S}_2\text{P}(\text{OMe})_2(\text{CNXyl}))\{\text{C}(\text{NHXyl})(\text{NEt}_2)\}]\text{ClO}_4$ .

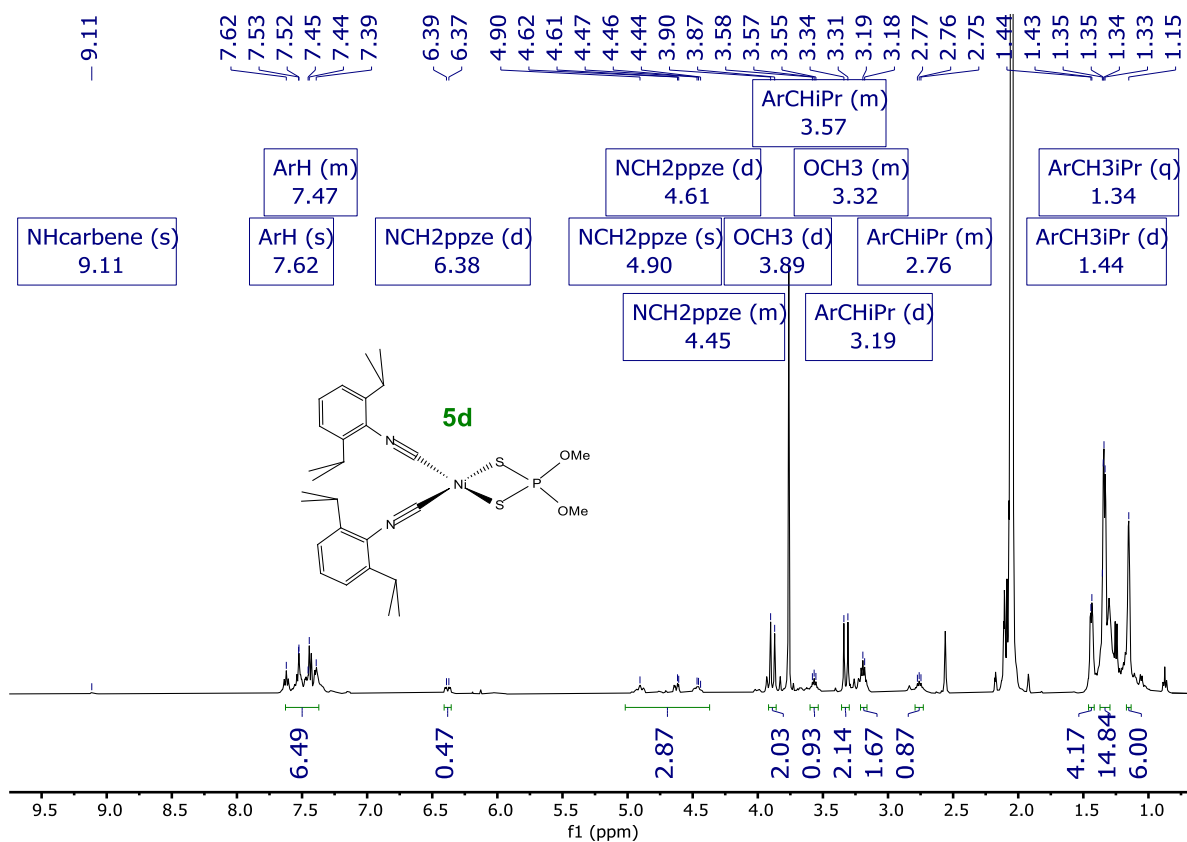

Figure S 89.  $^1\text{H}$  NMR ( $\text{CDCl}_3$ ) of compound 6d,  $[\text{Ni}(\text{S}_2\text{P}(\text{OMe})_2(\text{CNAr}))\{\text{C}(\text{NHAr})(\text{Nppze})\}]\text{ClO}_4$ . Decomposition products are presented in the crude, preventing a perfect integration of the chemical shift.

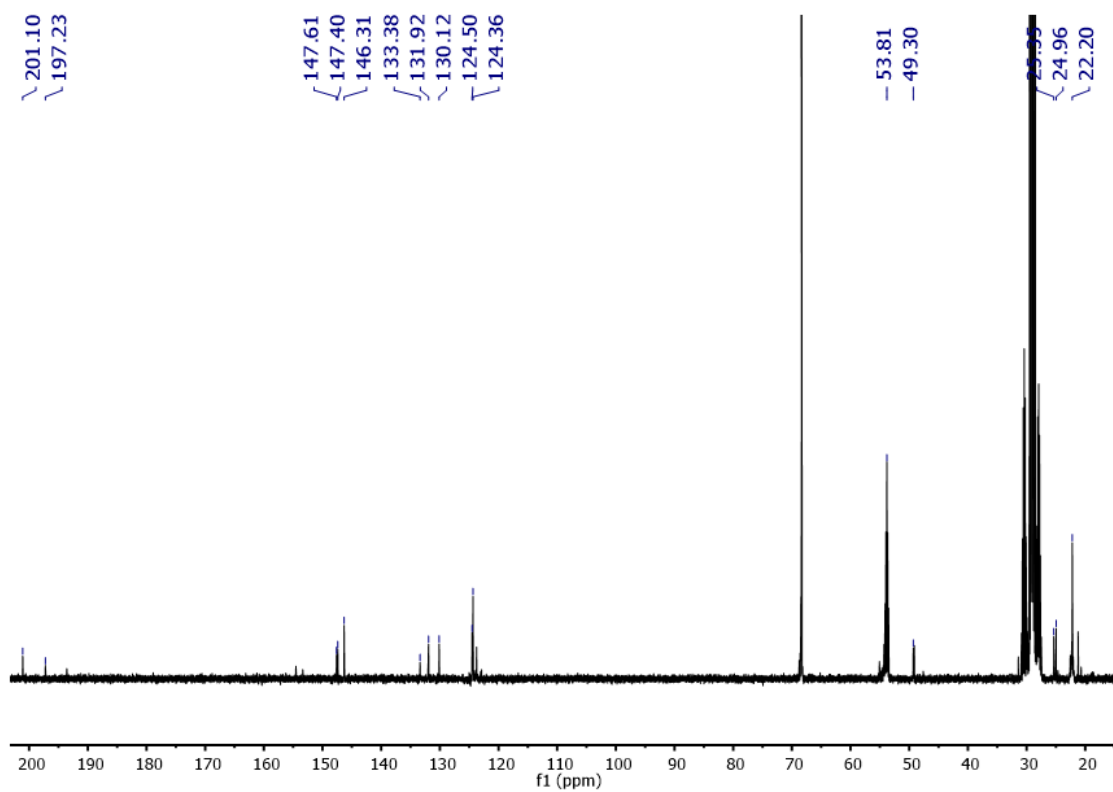

Figure S 90.  $^{13}\text{C}\{^1\text{H}\}$  NMR ( $\text{CDCl}_3$ ) of compound 6d,  $[\text{Ni}(\text{S}_2\text{P}(\text{OMe})_2(\text{CNAr})\{\text{C}(\text{NHAr})(\text{Nppze})\})]\text{ClO}_4$ .

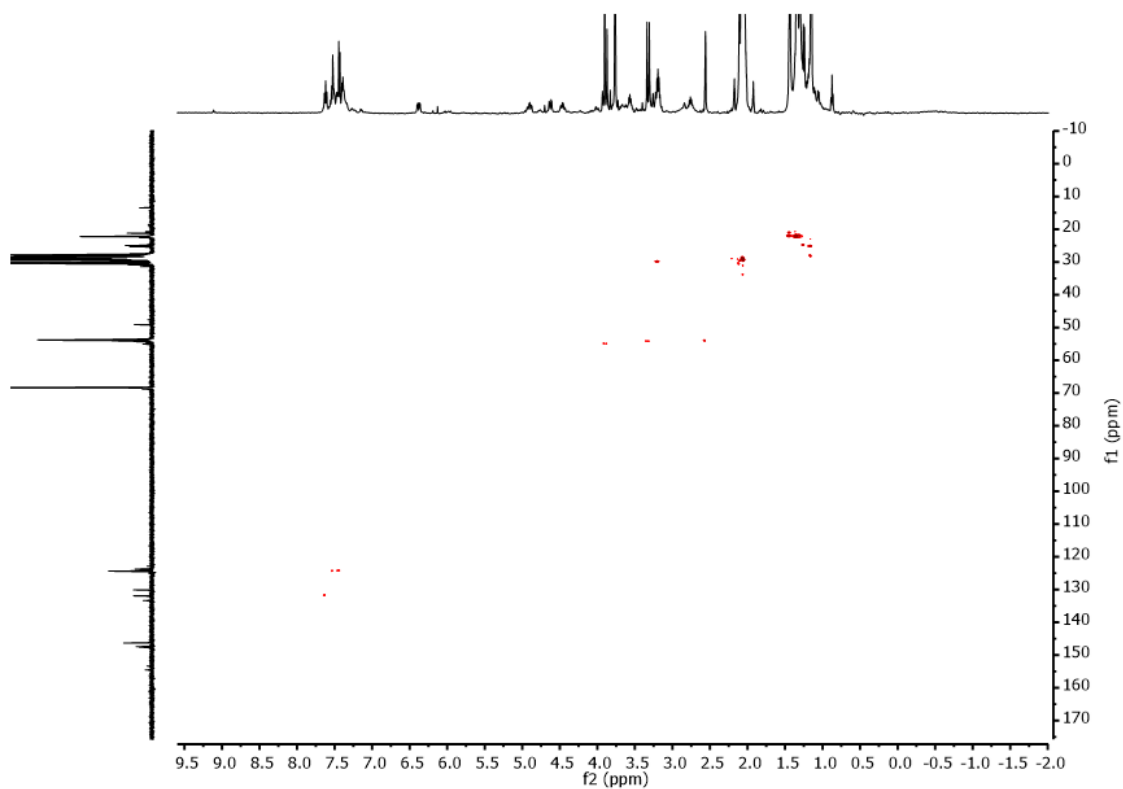

Figure S 91.  $^1\text{H}\text{-}^{13}\text{C}\{^1\text{H}\}$  HSQC NMR ( $\text{CDCl}_3$ ) of compound 6d,  $[\text{Ni}(\text{S}_2\text{P}(\text{OMe})_2(\text{CNAr})\{\text{C}(\text{NHAr})(\text{Nppze})\})]\text{ClO}_4$ .

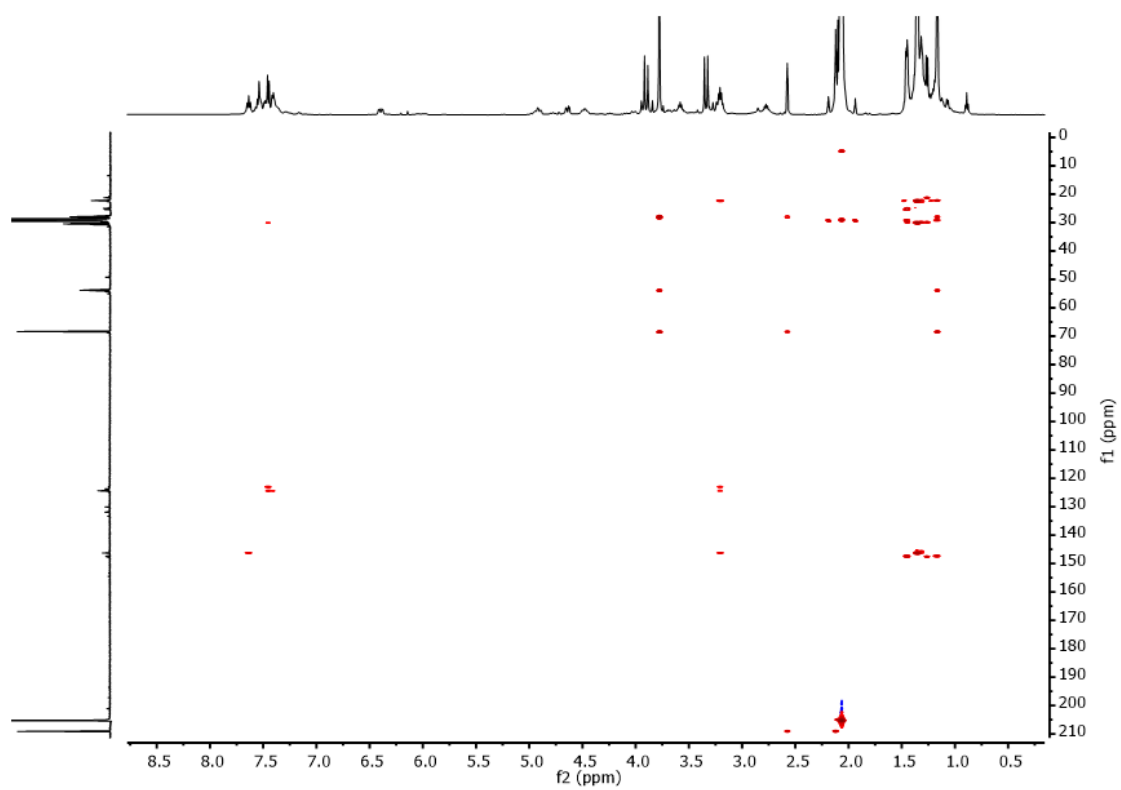

Figure S 92.  $^1\text{H}$ - $^{13}\text{C}\{^1\text{H}\}$  HSQC NMR ( $\text{CDCl}_3$ ) of compound 6d,  $[\text{Ni}(\text{S}_2\text{P}(\text{OMe})_2(\text{CNAr}))\{\text{C}(\text{NHAr})(\text{Nppze})\}]\text{ClO}_4$ .

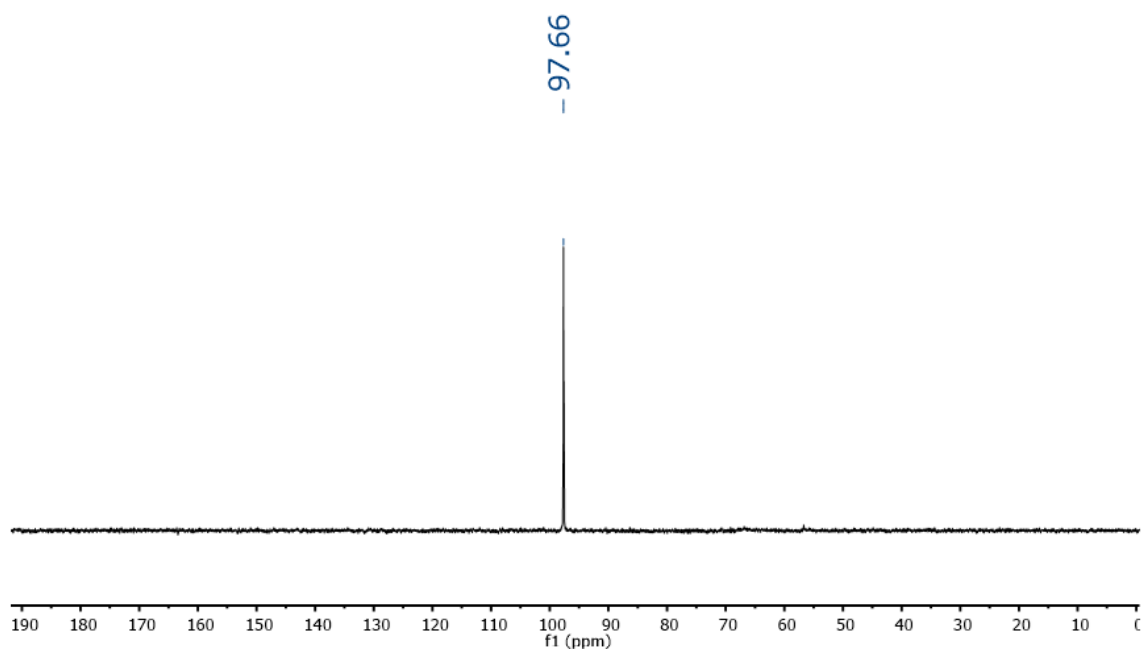

Figure S 93.  $^{31}\text{P}\{^1\text{H}\}$  NMR ( $\text{CDCl}_3$ ) of compound 6d,  $[\text{Ni}(\text{S}_2\text{P}(\text{OMe})_2(\text{CNAr}))\{\text{C}(\text{NHAr})(\text{Nppze})\}]\text{ClO}_4$ .

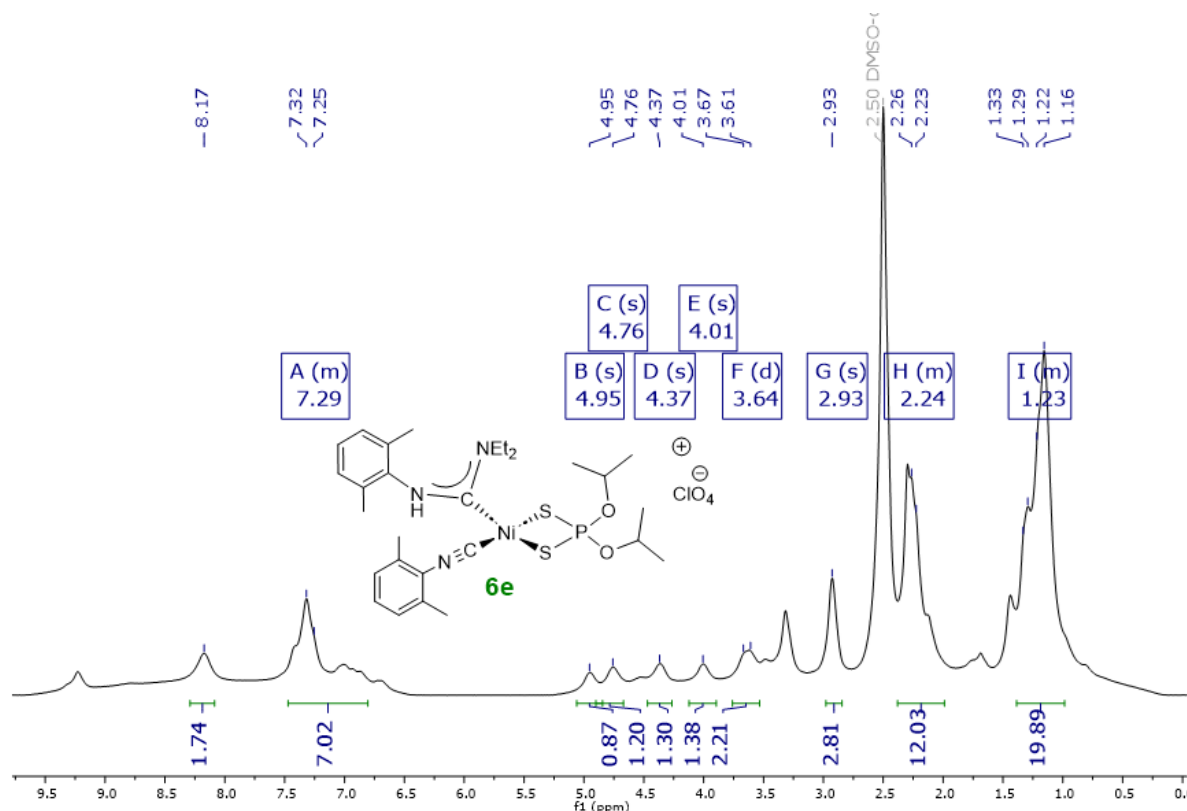

Figure S 94.  $^1\text{H}$  NMR (DMSO- $d_6$ ) of compound **6e**,  $[\text{Ni}(\text{S}_2\text{P}(\text{O}^i\text{Pr})_2)(\text{CNXYl})\{\text{C}(\text{NHXYl})(\text{NEt}_2)\}]\text{ClO}_4$ . Decomposition products are presented in the crude, preventing a perfect integration of the chemical shift.

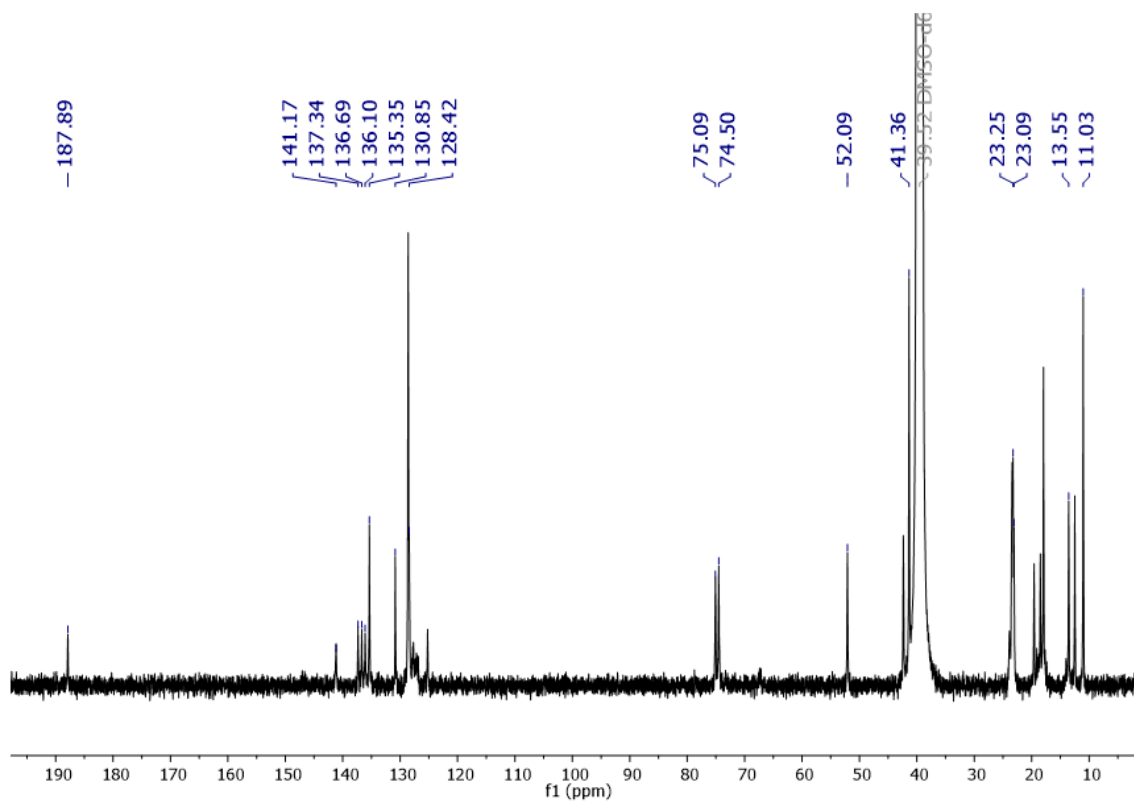

Figure S 95.  $^{13}\text{C}$   $\{^1\text{H}\}$  NMR (DMSO- $d_6$ ) of compound **6e**,  $[\text{Ni}(\text{S}_2\text{P}(\text{O}^i\text{Pr})_2)(\text{CNXYl})\{\text{C}(\text{NHXYl})(\text{NEt}_2)\}]\text{ClO}_4$ .

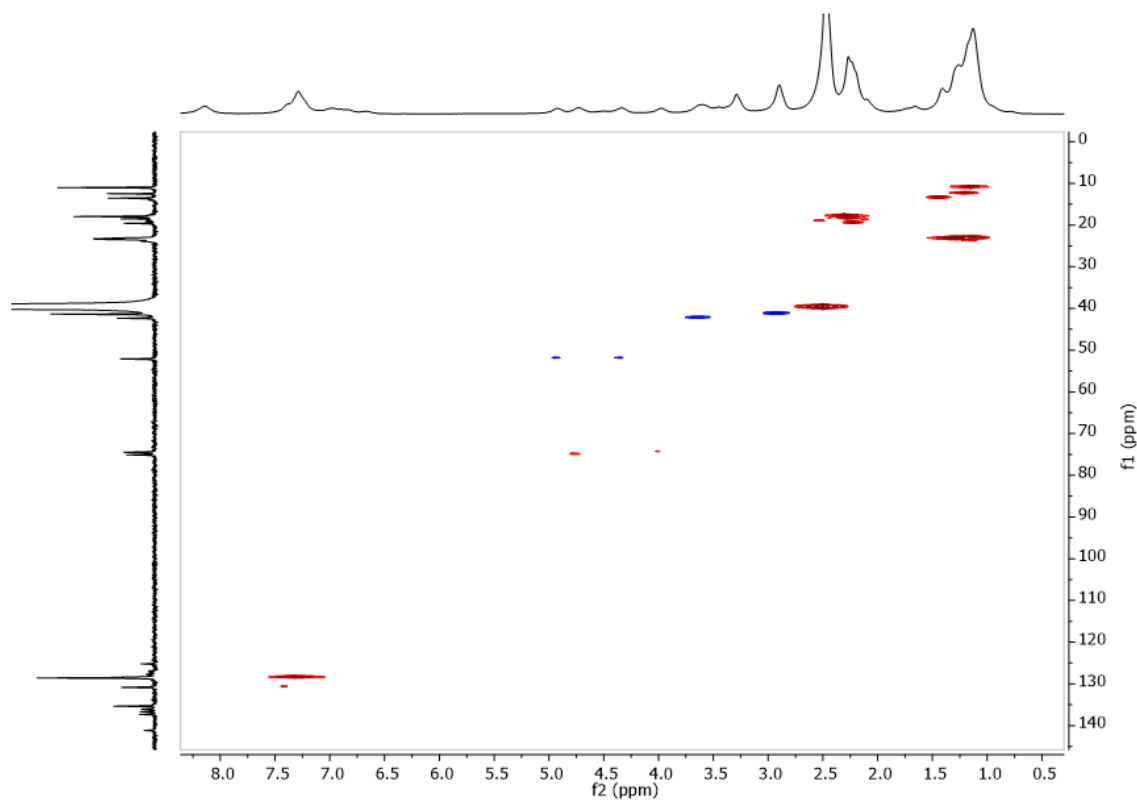

Figure S 96.  $^1\text{H}$ - $^{13}\text{C}\{^1\text{H}\}$  HSQC NMR (DMSO- $d_6$ ) of compound 6e,  $[\text{Ni}(\text{S}_2\text{P}(\text{O}^i\text{Pr})_2(\text{CNXy}))\{\text{C}(\text{NHXyl})(\text{NEt}_2)\}]\text{ClO}_4$ .

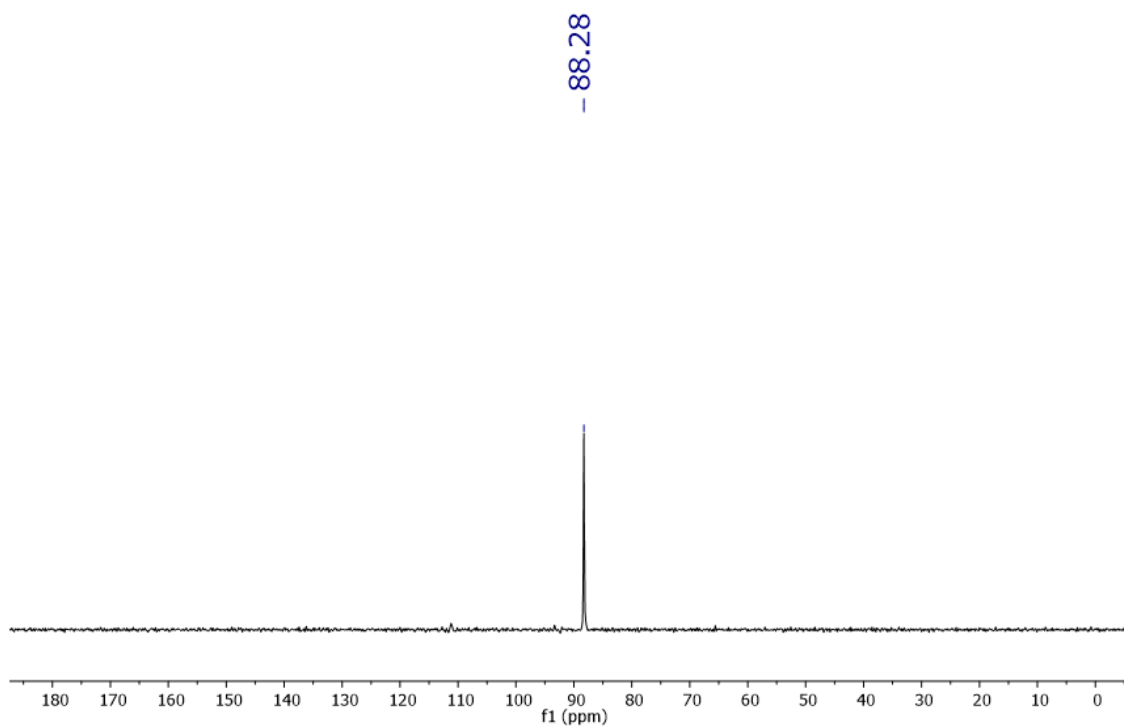

Figure S 97.  $^{31}\text{P}\{^1\text{H}\}$  NMR (DMSO- $d_6$ ) of compound 6e,  $[\text{Ni}(\text{S}_2\text{P}(\text{O}^i\text{Pr})_2(\text{CNXy}))\{\text{C}(\text{NHXyl})(\text{NEt}_2)\}]\text{ClO}_4$ .

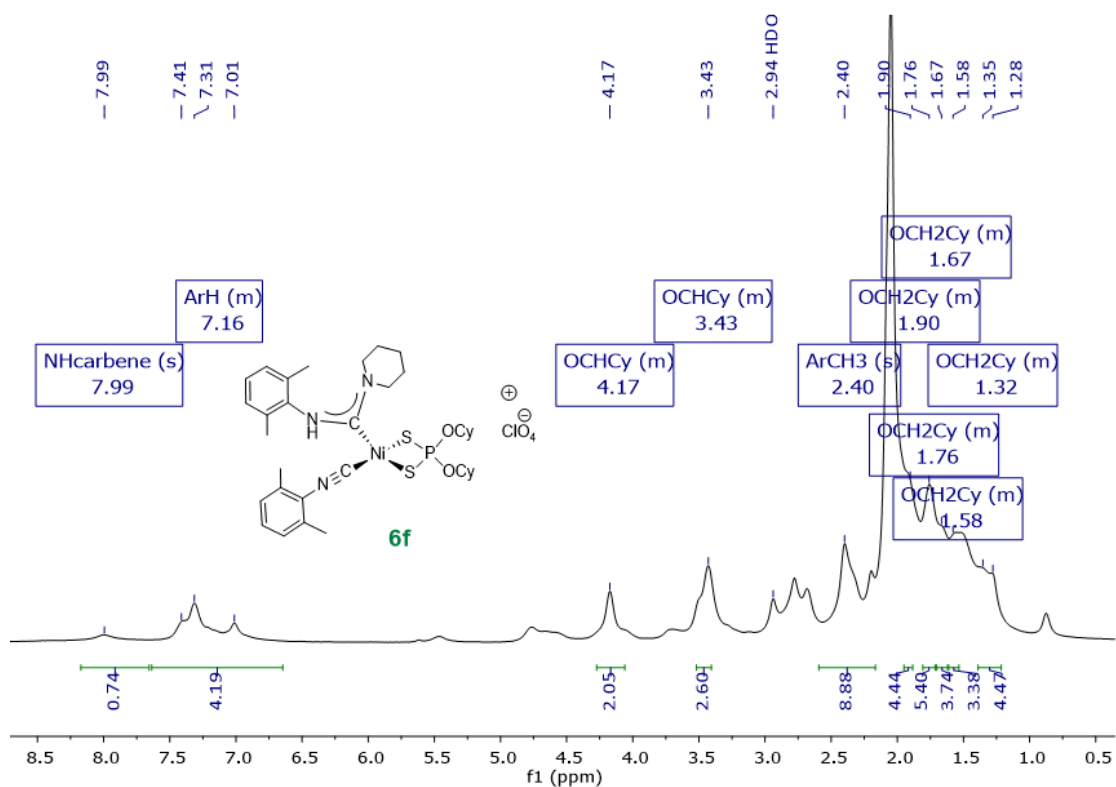

Figure S 98.  $^1\text{H}$  NMR ( $\text{Me}_2\text{CO}-d_6$ ) of compound **6f**,  $[\text{Ni}(\text{S}_2\text{P}(\text{OCy})_2)(\text{CNXyl})\{\text{C}(\text{NHXyl})(\text{Npip})\}]\text{ClO}_4$ .

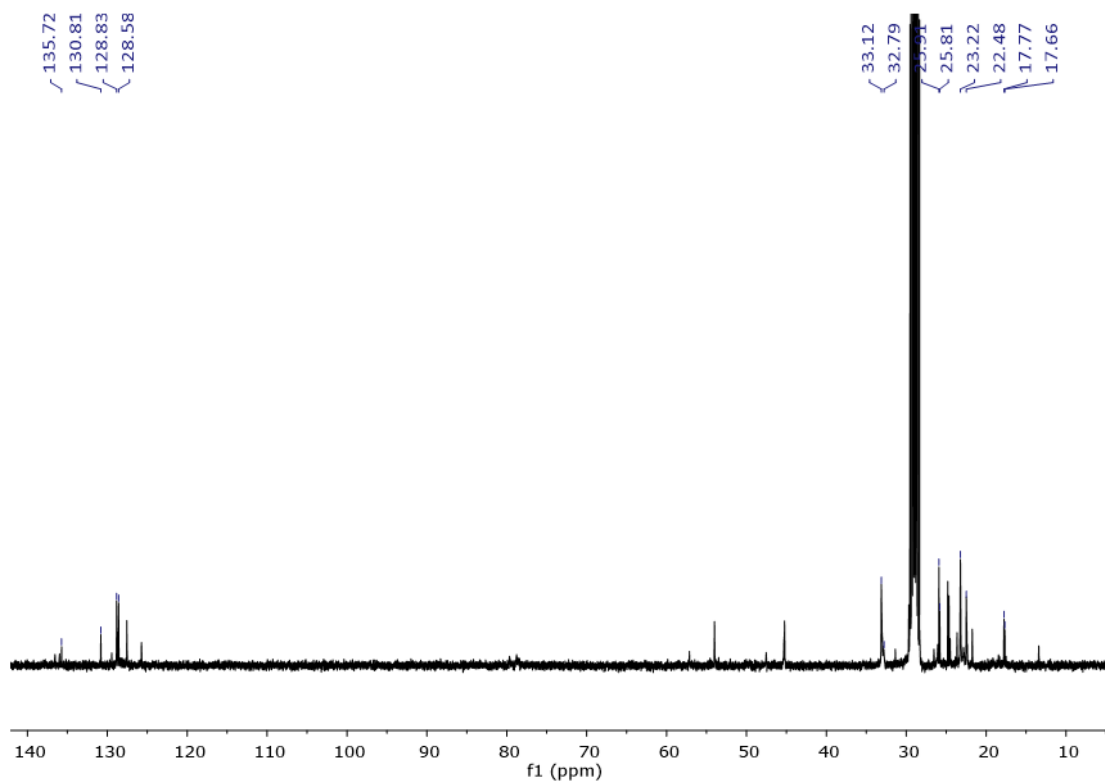

Figure S 99.  $^{13}\text{C}$   $\{^1\text{H}\}$  NMR ( $\text{Me}_2\text{CO}-d_6$ ) of compound **6f**,  $[\text{Ni}(\text{S}_2\text{P}(\text{OCy})_2)(\text{CNXyl})\{\text{C}(\text{NHXyl})(\text{Npip})\}]\text{ClO}_4$ .

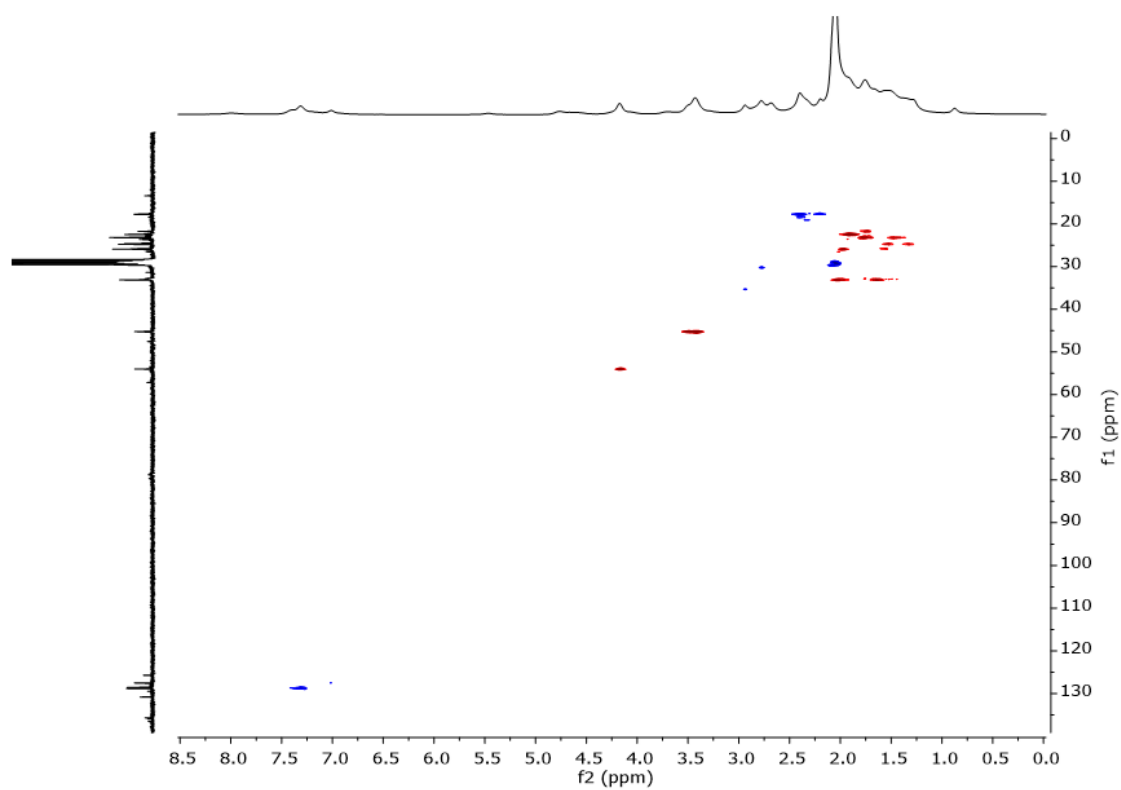

Figure S 100.  $^1\text{H}\text{-}^{13}\text{C}\{^1\text{H}\}$  HSQC NMR ( $\text{Me}_2\text{CO}\text{-d}_6$ ) of compound 6f,  $[\text{Ni}(\text{S}_2\text{P}(\text{OCy})_2(\text{CNXyl})\{\text{C}(\text{NHXyl})(\text{Npip})\})\text{ClO}_4$ .

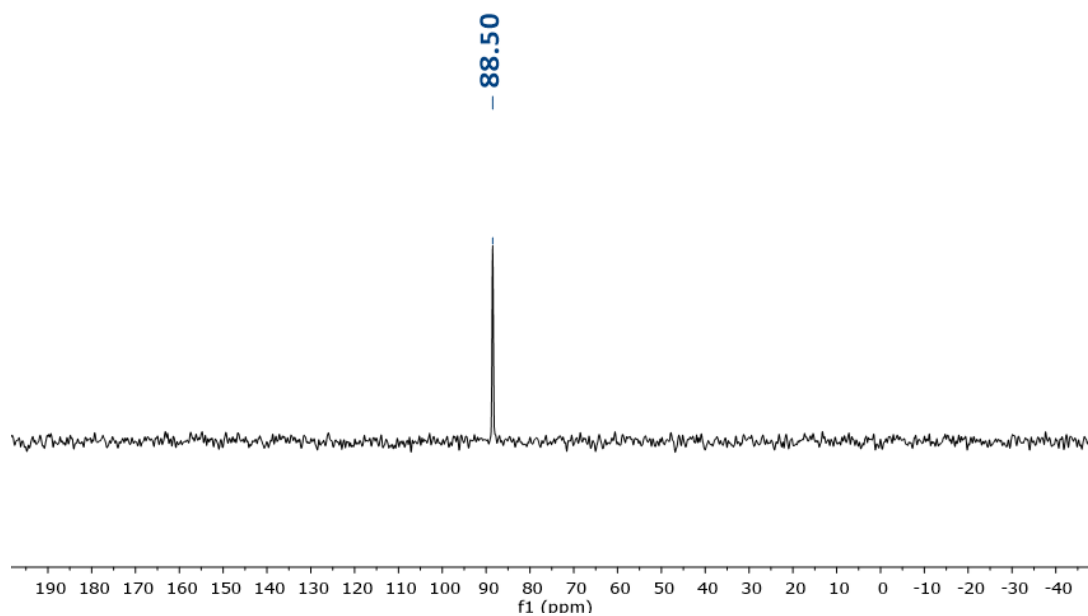

Figure S 101.  $^{31}\text{P}\{^1\text{H}\}$  NMR ( $\text{Me}_2\text{CO}\text{-d}_6$ ) of compound 6f,  $[\text{Ni}(\text{S}_2\text{P}(\text{OCy})_2(\text{CNXyl})\{\text{C}(\text{NHXyl})(\text{Npip})\})\text{ClO}_4$ .



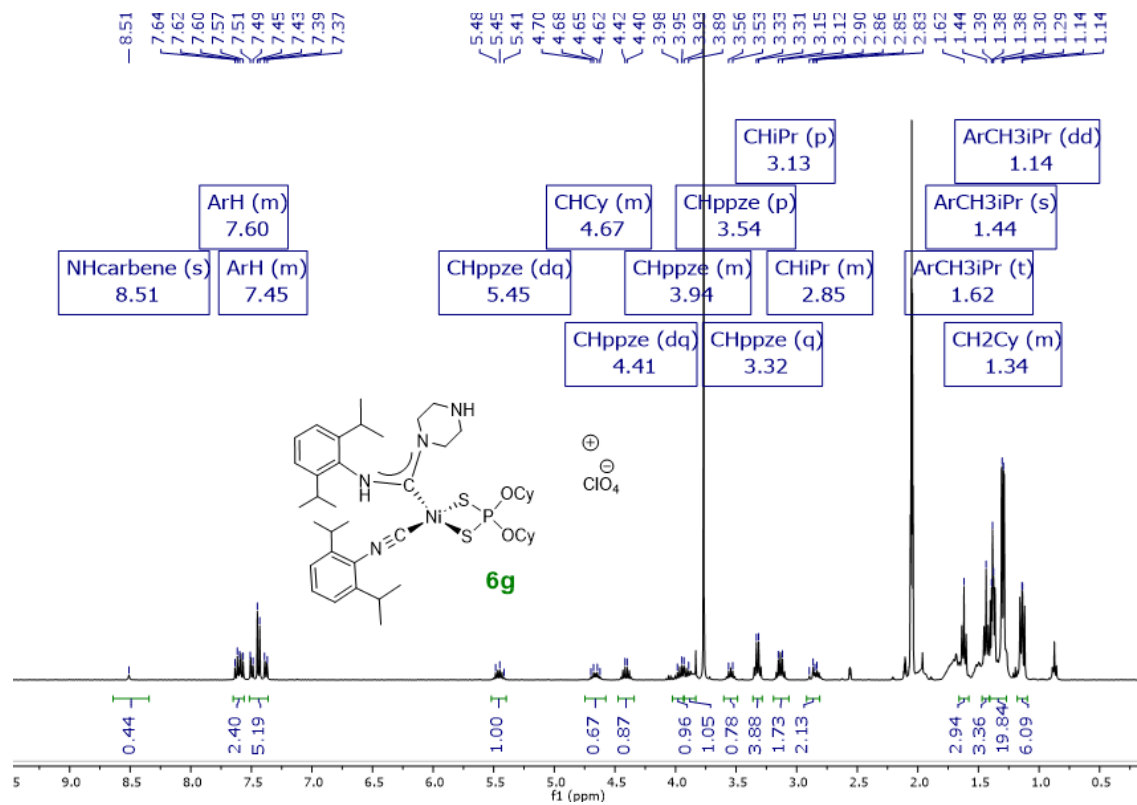

Figure S 102.  $^1\text{H}$  NMR ( $\text{Me}_2\text{CO}-d_6$ ) of compound 6g,  $[\text{Ni}(\text{S}_2\text{P}(\text{OCy})_2(\text{CNAr})\{\text{C}(\text{NHAr})(\text{NPpze})\})]\text{ClO}_4$ .

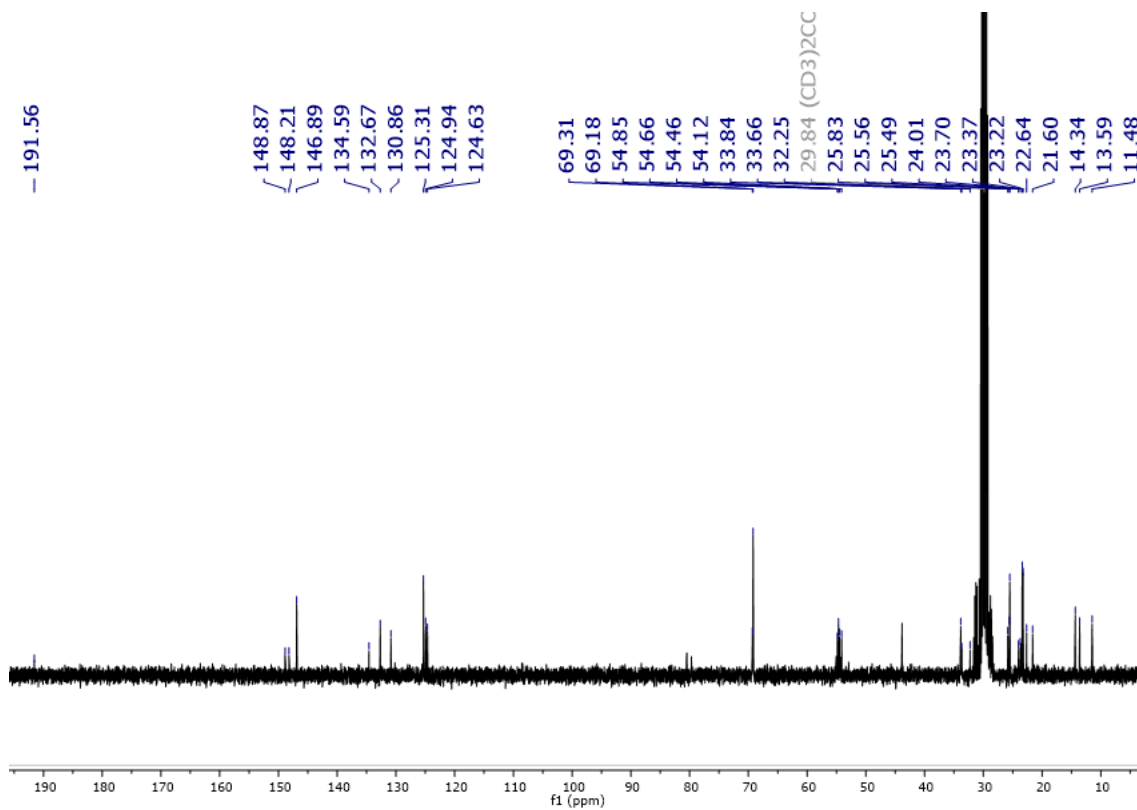

Figure S 103.  $^{13}\text{C}$   $\{^1\text{H}\}$  NMR ( $\text{Me}_2\text{CO}-d_6$ ) of compound 6g,  $[\text{Ni}(\text{S}_2\text{P}(\text{OCy})_2(\text{CNAr})\{\text{C}(\text{NHAr})(\text{NPpze})\})]\text{ClO}_4$ .

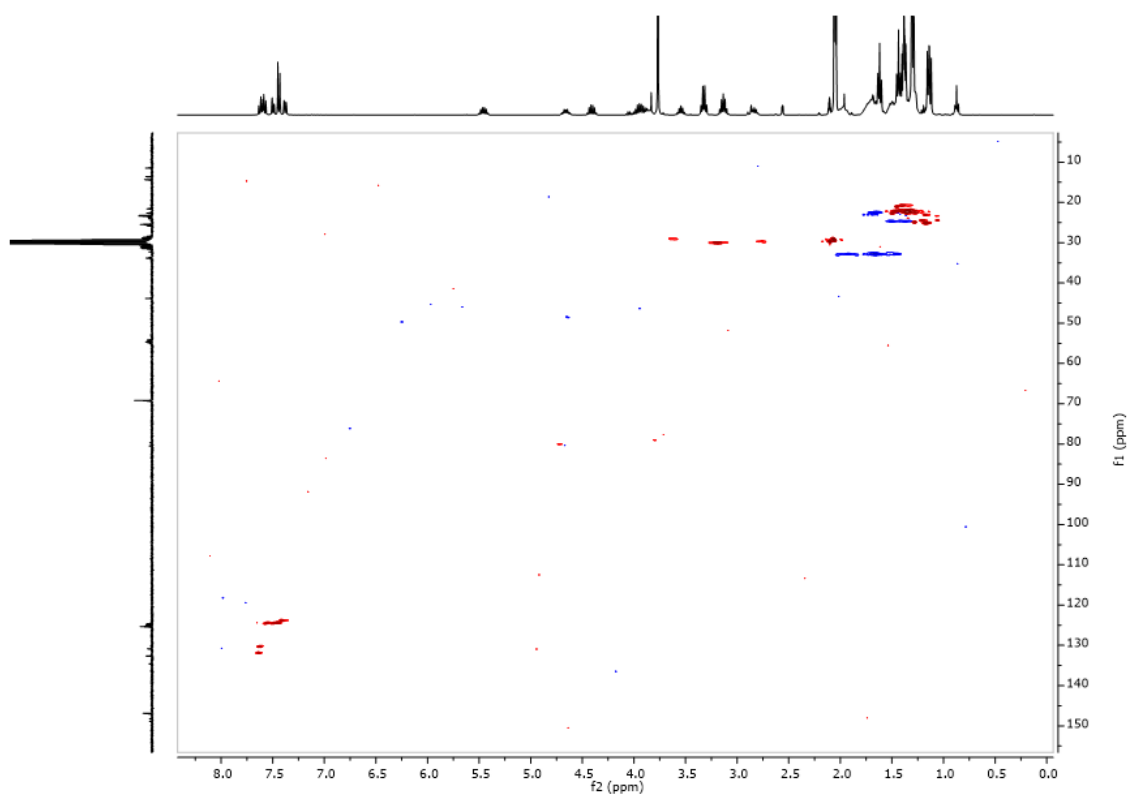

Figure S 104.  $^1\text{H}$ - $^{13}\text{C}\{^1\text{H}\}$  HSQC NMR ( $\text{Me}_2\text{CO-d}_6$ ) of compound 6g,  $[\text{Ni}(\text{S}_2\text{P}(\text{OCy})_2(\text{CNAr})\{\text{C}(\text{NHAr})(\text{NPpze})\})]\text{ClO}_4$ .

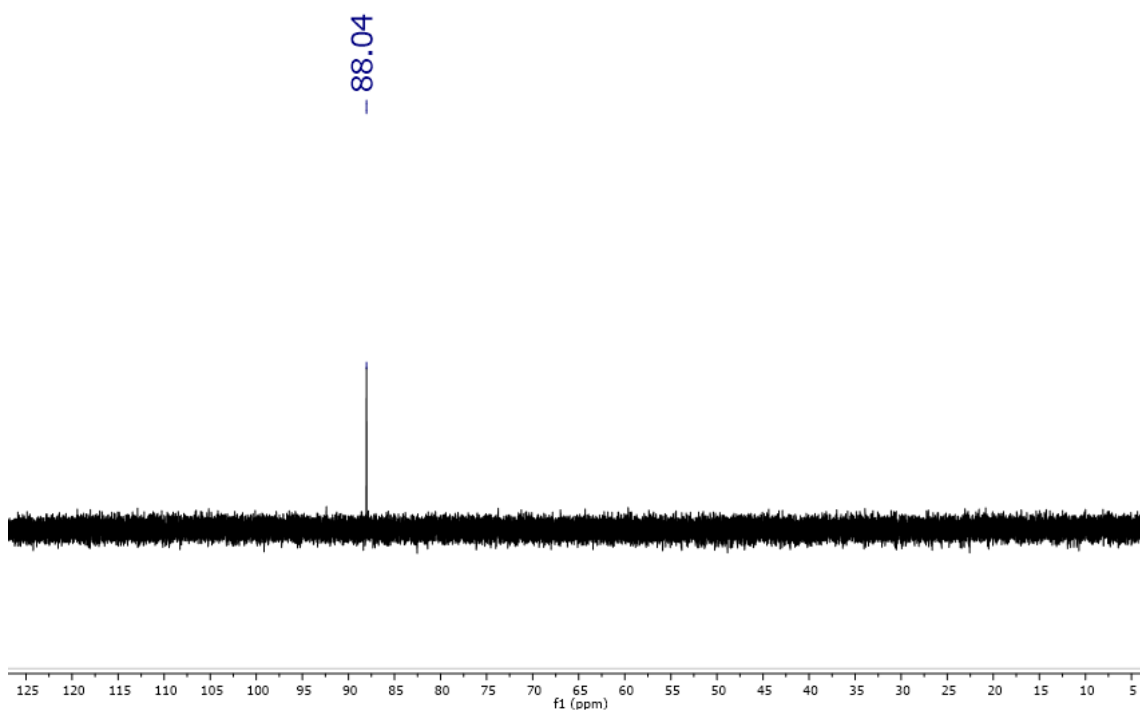

Figure S 105.  $^{31}\text{P}\{^1\text{H}\}$  NMR ( $\text{Me}_2\text{CO-d}_6$ ) of compound 6g,  $[\text{Ni}(\text{S}_2\text{P}(\text{OCy})_2(\text{CNAr})\{\text{C}(\text{NHAr})(\text{NPpze})\})]\text{ClO}_4$ .

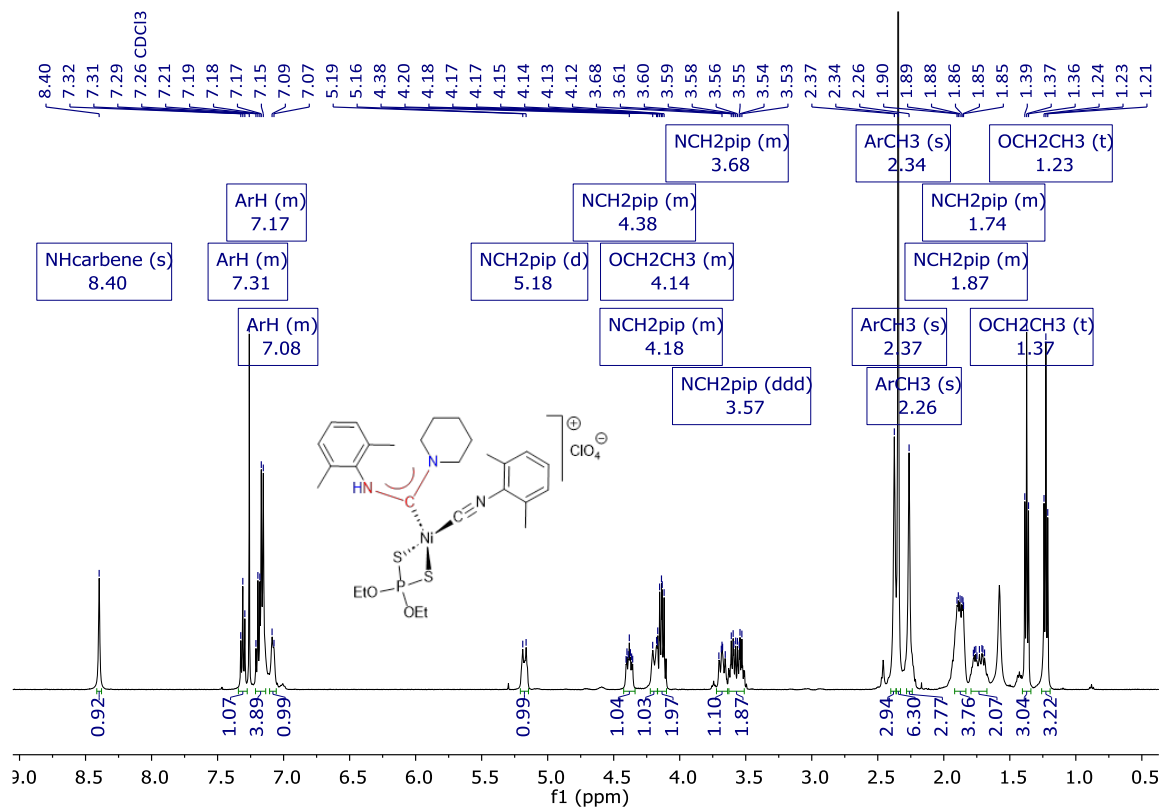

Figure S 106.  $^1\text{H}$  NMR ( $\text{CDCl}_3$ ) of compound 6h,  $[\text{Ni}(\text{S}_2\text{P}(\text{OEt})_2(\text{CNXyl})\{\text{C}(\text{NHXyl})(\text{pip})\})]\text{ClO}_4$ .

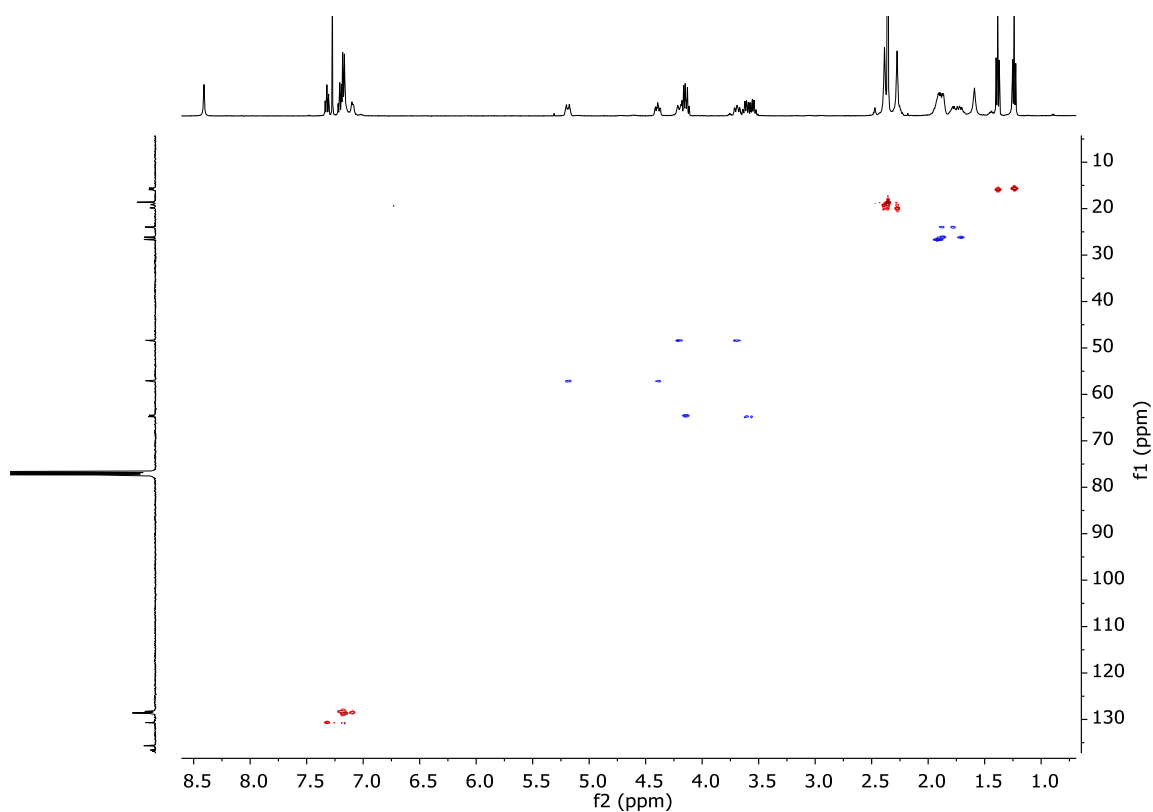

Figure S 107.  $^1\text{H}$ - $^{13}\text{C}\{^1\text{H}\}$  HSQC NMR ( $\text{CDCl}_3$ ) of compound 6h,  $[\text{Ni}(\text{S}_2\text{P}(\text{OEt})_2(\text{CNXyl})\{\text{C}(\text{NHXyl})(\text{pip})\})]\text{ClO}_4$ .

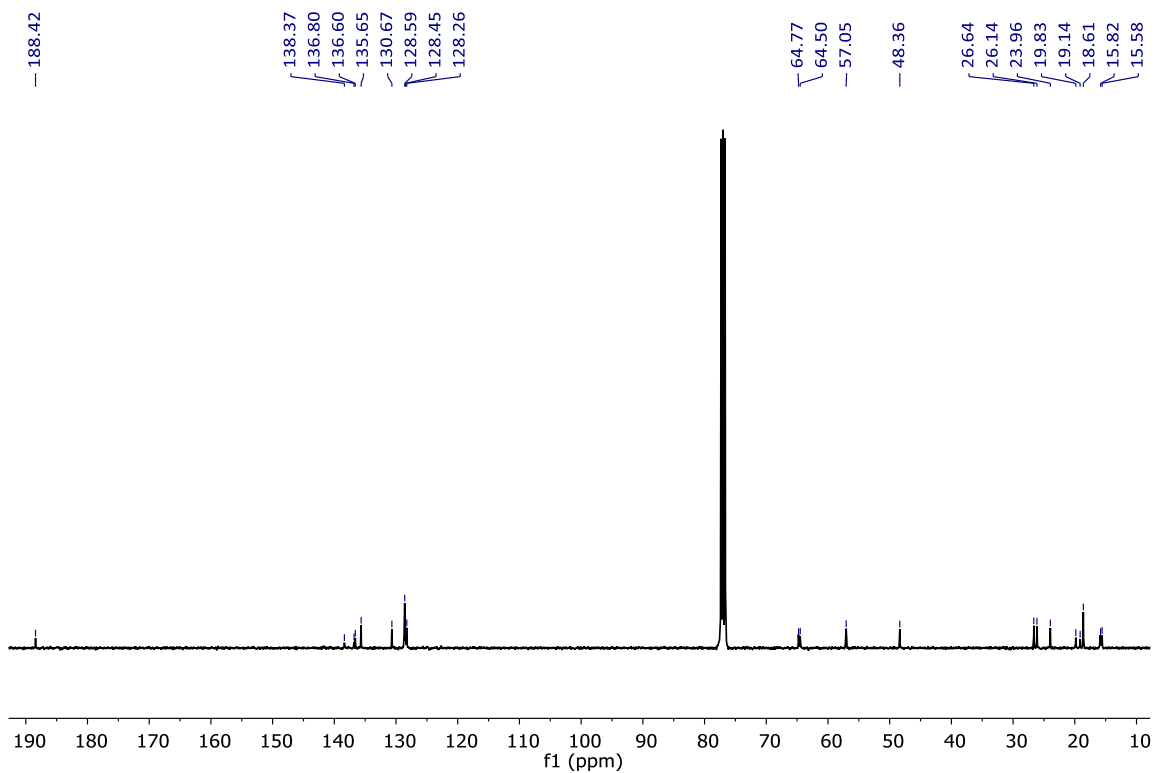

Figure S 108.  $^{13}\text{C}\{^1\text{H}\}$  NMR ( $\text{CDCl}_3$ ) of compound 6h,  $[\text{Ni}(\text{S}_2\text{P}(\text{OEt})_2(\text{CNXyl})\{\text{C}(\text{NHXyl})\}(\text{pip}))]\text{ClO}_4$ .

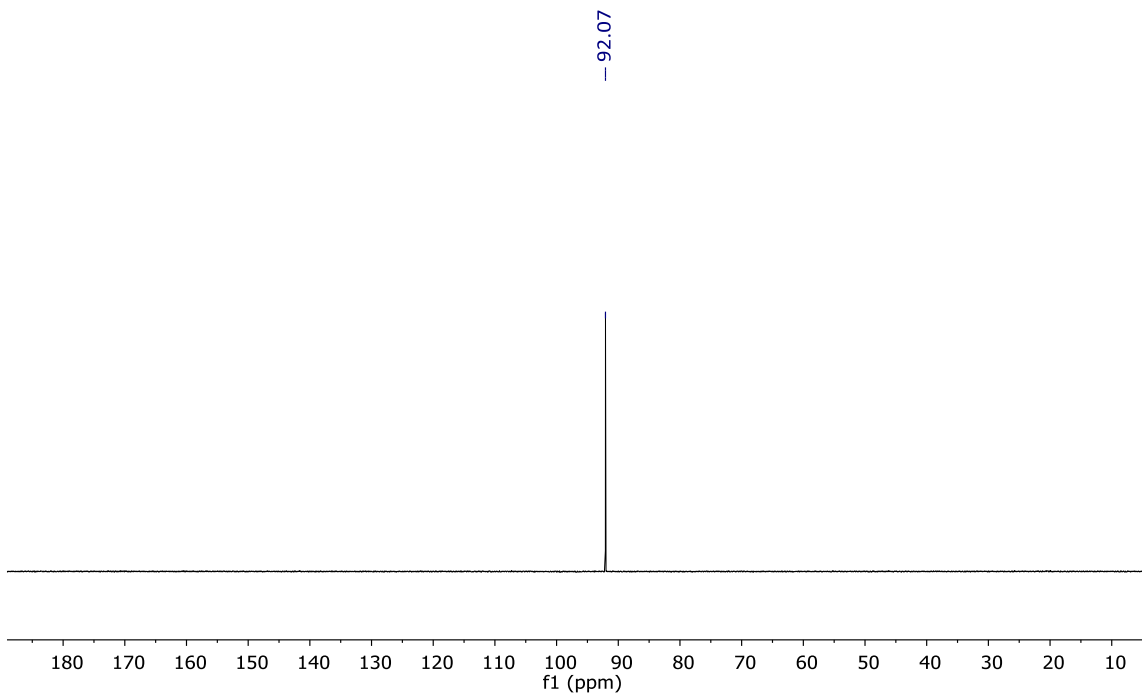

Figure S 109.  $^{31}\text{P}\{^1\text{H}\}$  NMR ( $\text{CDCl}_3$ ) of compound 6h,  $[\text{Ni}(\text{S}_2\text{P}(\text{OEt})_2(\text{CNXyl})\{\text{C}(\text{NHXyl})\}(\text{pip}))]\text{ClO}_4$ .

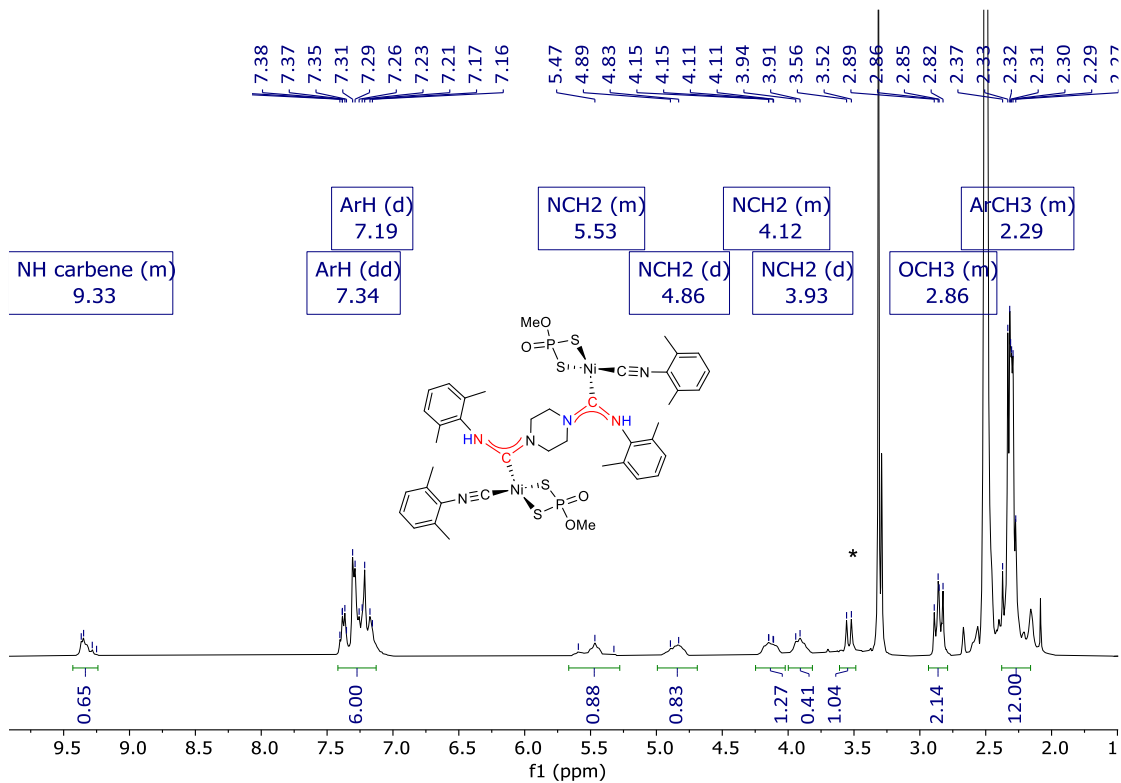

Figure S 110.  $^1\text{H}$  NMR ( $\text{CDCl}_3$ ) of compound 7,  $[\{\text{Ni}(\text{S}_2\text{P}(=\text{O})(\text{OMe})(\text{CNXyl})_2\text{C}(\text{NHXyl})\}_2(\text{N}_2\text{C}_4\text{H}_8)]$ . \*Chemical shift of  $-\text{OCH}_3$  from the minor product (ratio Z/E, 77:23, see  $^{31}\text{P}\{^1\text{H}\}$ ).

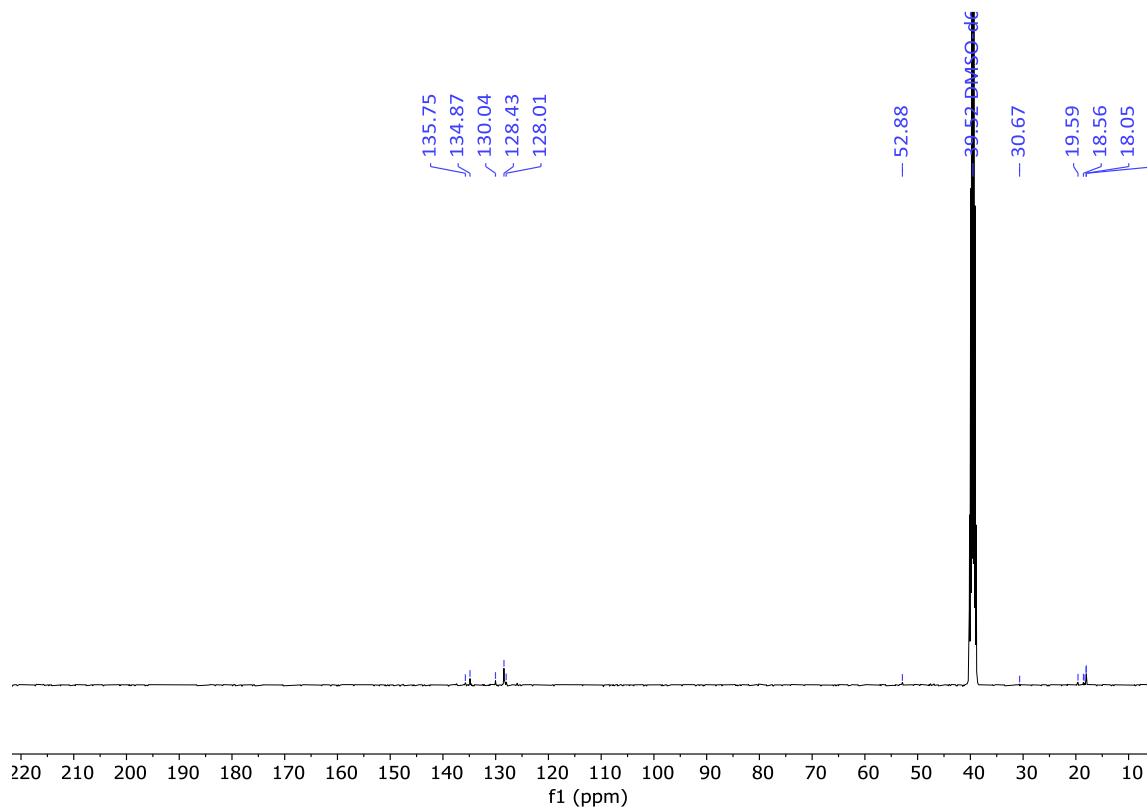

Figure S 111.  $^{13}\text{C}\{^1\text{H}\}$  NMR ( $\text{DMSO}-d_6$ ) of compound 7,  $[\{\text{Ni}(\text{S}_2\text{P}(=\text{O})(\text{OMe})(\text{CNXyl})_2\text{C}(\text{NHXyl})\}_2(\text{N}_2\text{C}_4\text{H}_8)]$ . Chemical shift of C carbene is not observed due to the low solubility of the complex (spectrum was recorded with 35000 scans)

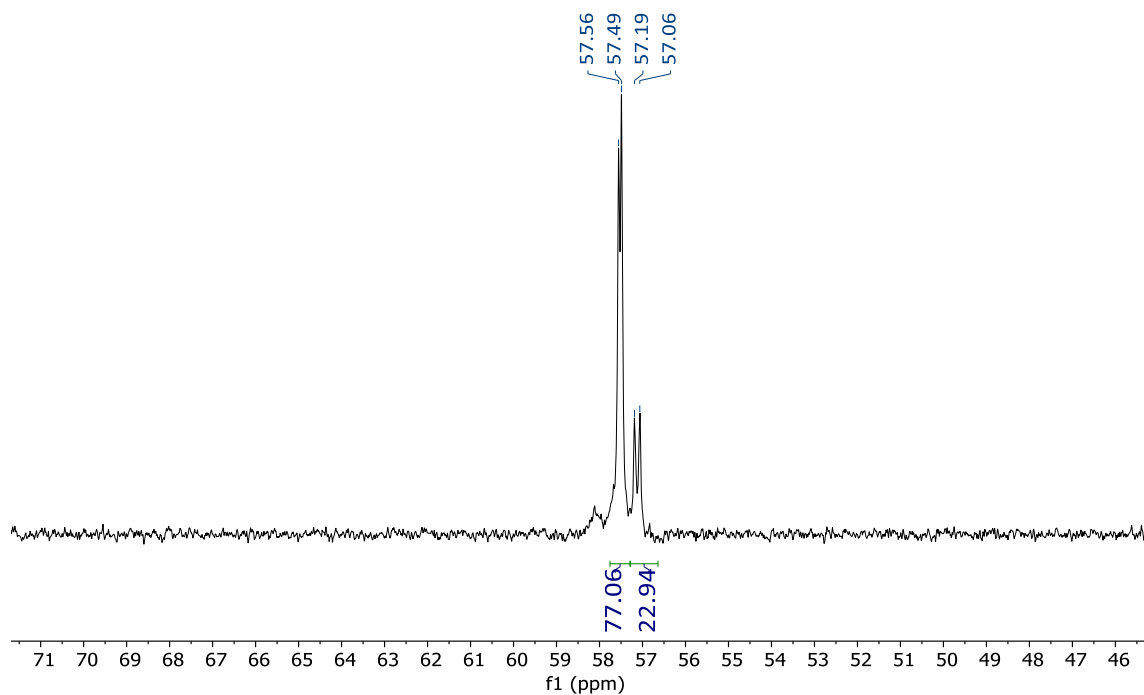

Figure S 112.  $^{31}\text{P}\{^1\text{H}\}$  NMR (DMSO- $d_6$ ) of compound 7,  $[\{\text{Ni}(\text{S}_2\text{P}(=\text{O})(\text{OMe})(\text{CNXyl})_2\text{C}(\text{NHXyl})\}_2(\text{N}_2\text{C}_4\text{H}_8))]$ . Ratio of isomers Z/E 77:23.

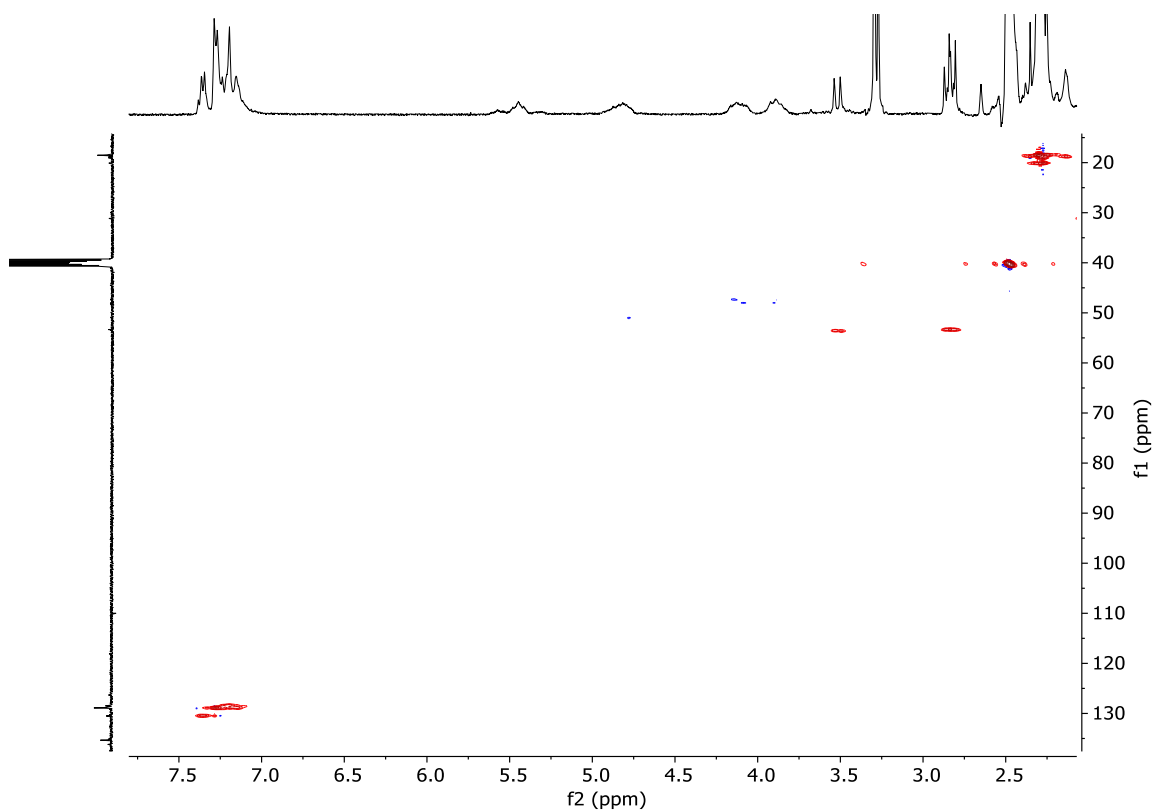

Figure S 113.  $^1\text{H}\text{-}^{13}\text{C}\{^1\text{H}\}$  HSQC NMR (DMSO- $d_6$ ) of compound 7,  $[\{\text{Ni}(\text{S}_2\text{P}(=\text{O})(\text{OMe})(\text{CNXyl})_2\text{C}(\text{NHXyl})\}_2(\text{N}_2\text{C}_4\text{H}_8))]$ .

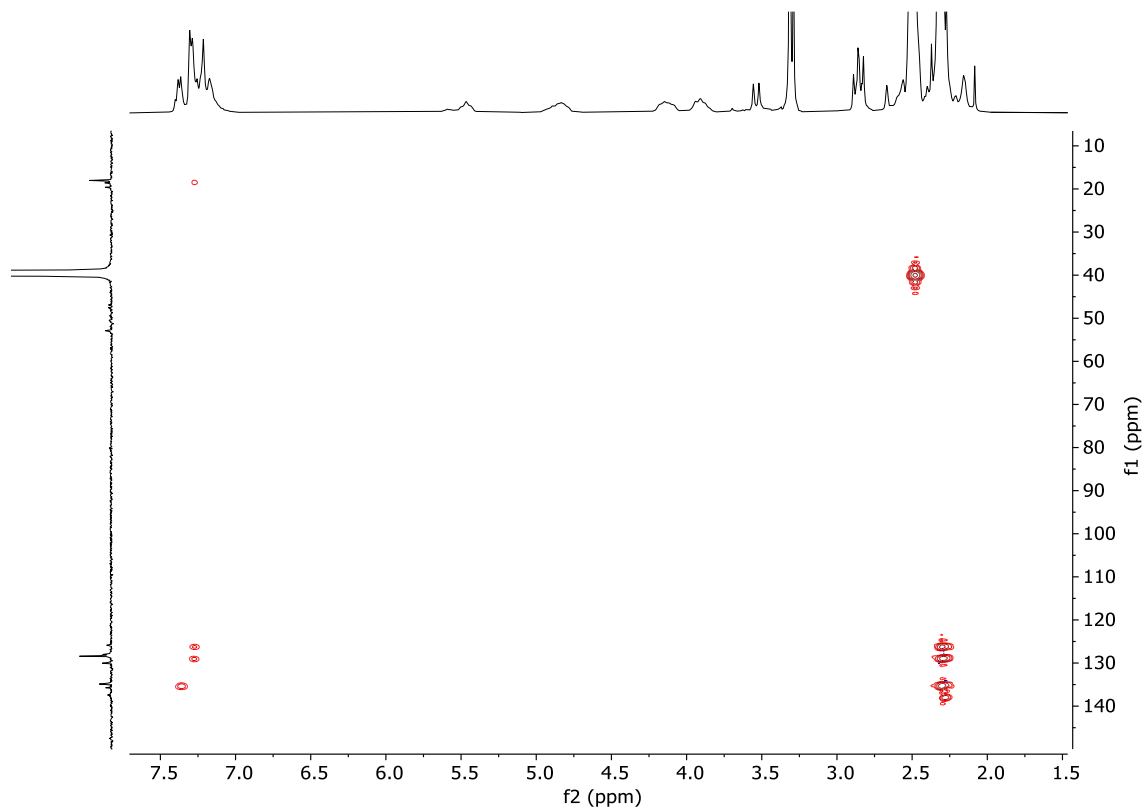

Figure S 114.  $^1\text{H}$ - $^{13}\text{C}\{^1\text{H}\}$  HSQC NMR (DMSO- $d_6$ ) of compound 7,  $[\{\text{Ni}(\text{S}_2\text{P}(=\text{O})(\text{OMe})(\text{CNXyl})_2\text{C}(\text{NHXyl})\}_2(\text{N}_2\text{C}_4\text{H}_8))]$ .

**X-Ray Diffraction structures of neutral and cationic diisocyanide dithiophosphate Ni(II) complexes 2e, 3c, 3d, 3e, 4a, 4c, 4e, 4f, 5b, 5c, 5e, 6c, 6e, 6g, 6h, 7 and 8.**

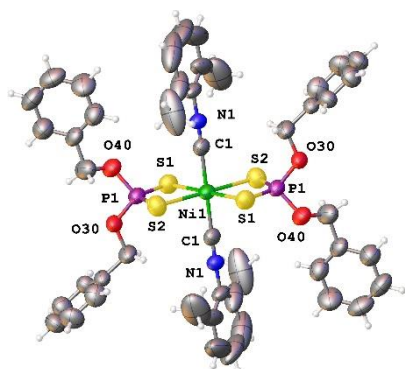

**Compound 2e:**  $C_{46}H_{46}N_2NiO_4P_2S_4$  ( $M = 939.74$  g/mol): monoclinic, space group  $P2_1/n$  (no. 14),  $a = 11.1533(6)$  Å,  $b = 8.8012(8)$  Å,  $c = 24.1739(18)$  Å,  $\beta = 94.913(6)^\circ$ ,  $V = 2364.3(3)$  Å<sup>3</sup>,  $Z = 2$ ,  $T = 293(2)$  K,  $\mu(\text{MoK}\alpha) = 0.697$  mm<sup>-1</sup>,  $D_{\text{calc}} = 1.320$  g/cm<sup>3</sup>, 12866 reflections measured ( $5.734^\circ \leq 2\theta \leq 59.31^\circ$ ), 5650 unique ( $R_{\text{int}} = 0.0543$ ,  $R_{\text{sigma}} = 0.1019$ ) which were used in all calculations. The final  $R_1$  was 0.0670 ( $I > 2\sigma(I)$ ) and  $wR_2$  was 0.1975 (all data).. [CCDC: 2308594](#)

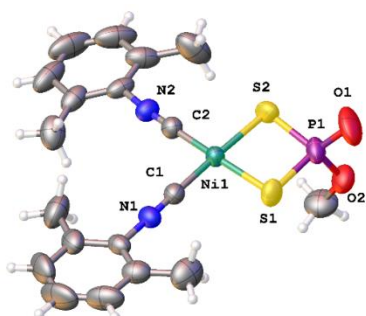

**Compound 3c:**  $C_{19}H_{21}N_2O_2PS_2Ni$  ( $M = 463.18$  g/mol): monoclinic, space group  $P2_1/n$  (no. 14),  $a = 9.6257(4)$  Å,  $b = 22.5461(9)$  Å,  $c = 9.8951(3)$  Å,  $\beta = 95.047(3)^\circ$ ,  $V = 2139.14(14)$  Å<sup>3</sup>,  $Z = 4$ ,  $T = 293$  K,  $\mu(\text{Mo K}\alpha) = 1.193$  mm<sup>-1</sup>,  $D_{\text{calc}} = 1.438$  g/cm<sup>3</sup>, 11284 reflections measured ( $4.51^\circ \leq 2\theta \leq 59.13^\circ$ ), 5057 unique ( $R_{\text{int}} = 0.0251$ ,  $R_{\text{sigma}} = 0.0358$ ) which were used in all calculations. The final  $R_1$  was 0.0367 ( $I > 2\sigma(I)$ ) and  $wR_2$  was 0.0946 (all data). [CCDC: 2298997](#)

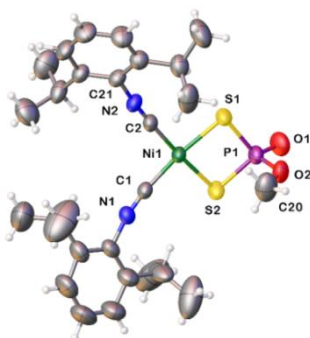

**Compound 3d:**  $C_{27}H_{37}N_2NiO_2PS_2$  ( $M = 575.38$  g/mol): monoclinic, space group  $P2_1/n$  (no. 14),  $a = 13.8109(4)$  Å,  $b = 10.3758(3)$  Å,  $c = 21.4053(5)$  Å,  $\beta = 91.863(2)^\circ$ ,  $V = 3065.74(15)$  Å<sup>3</sup>,  $Z = 4$ ,  $T = 293$  K,  $\mu(\text{MoK}\alpha) = 0.846$  mm<sup>-1</sup>,  $D_{\text{calc}} = 1.247$  g/cm<sup>3</sup>, 14802 reflections measured ( $4.362 \leq 2\theta \leq 59.586$ ), 7266 unique ( $R_{\text{int}} = 0.0248$ ,  $R_{\text{sigma}} = 0.0396$ ) which were used in all calculations. The final  $R_1$  was 0.0443 ( $I > 2\sigma(I)$ ) and  $wR_2$  was 0.1101 (all data). [CCDC: 2298999](#)

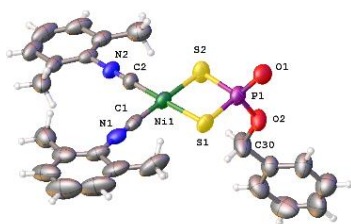

**Compound 3e:**  $C_{25}H_{25}N_2NiO_2PS_2$  ( $M = 539.27$  g/mol): monoclinic, space group  $P2_1/c$  (no. 14),  $a = 14.2683(17)$  Å,  $b = 12.6497(7)$  Å,  $c = 14.8317(16)$  Å,  $\beta = 94.874(10)^\circ$ ,  $V = 2667.3(5)$  Å<sup>3</sup>,  $Z = 4$ ,  $T = 293(2)$  K,  $\mu(\text{Mo K}\alpha) = 0.967$  mm<sup>-1</sup>,  $D_{\text{calc}} = 1.343$  g/cm<sup>3</sup>, 10091 reflections measured ( $4.984^\circ \leq 2\theta \leq 49.454^\circ$ ), 4547 unique ( $R_{\text{int}} = 0.0543$ ,  $R_{\text{sigma}} = 0.1063$ ) which were used in all calculations. The final  $R_1$  was 0.0579 ( $I > 2\sigma(I)$ ) and  $wR_2$  was 0.1390 (all data). [CCDC: 2308595](#)

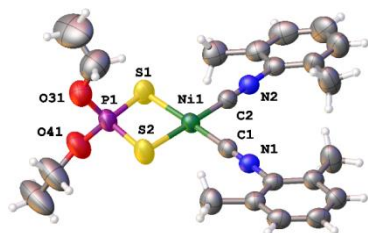

**Compound 4a:**  $C_{22}H_{28}ClN_2NiO_6PS_2$  ( $M = 605.71$  g/mol): triclinic, space group  $P-1$  (no. 2),  $a = 7.7849(4)$  Å,  $b = 9.6864(4)$  Å,  $c = 19.6397(10)$  Å,  $\alpha = 100.452(4)^\circ$ ,  $\beta = 100.473(4)^\circ$ ,  $\gamma = 100.035(4)^\circ$ ,  $V = 1398.88(12)$  Å<sup>3</sup>,  $Z = 2$ ,  $T = 293(2)$  K,  $\mu(\text{MoK}\alpha) = 1.033$  mm<sup>-1</sup>,  $D_{\text{calc}} = 1.438$  g/cm<sup>3</sup>, 11919 reflections measured ( $4.324^\circ \leq 2\theta \leq 59.548^\circ$ ), 6565 unique ( $R_{\text{int}} = 0.0203$ ,  $R_{\text{sigma}} = 0.0344$ ) which were used in all calculations. The final  $R_1$  was 0.0697 ( $I > 2\sigma(I)$ ) and  $wR_2$  was 0.2320 (all data). [CCDC: 2299006](#)



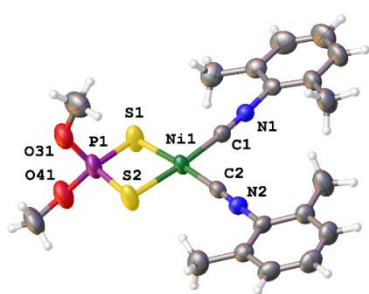

**Compound 4c:**  $C_{20}H_{24}ClN_2NiO_6PS_2$  ( $M=577.66$  g/mol): triclinic, space group P-1 (no. 2),  $a = 7.2158(3)$  Å,  $b = 10.0031(8)$  Å,  $c = 18.9825(10)$  Å,  $\alpha = 99.859(5)^\circ$ ,  $\beta = 97.908(4)^\circ$ ,  $\gamma = 105.106(5)^\circ$ ,  $V = 1279.16(13)$  Å<sup>3</sup>,  $Z = 2$ ,  $T = 293$  K,  $\mu(\text{MoK}\alpha) = 1.126$  mm<sup>-1</sup>,  $D_{\text{calc}} = 1.500$  g/cm<sup>3</sup>, 9842 reflections measured ( $4.32^\circ \leq 2\theta \leq 59.608^\circ$ ), 5964 unique ( $R_{\text{int}} = 0.0226$ ,  $R_{\text{sigma}} = 0.0485$ ) which were used in all calculations. The final  $R_1$  was 0.0589 ( $I > 2\sigma(I)$ ) and  $wR_2$  was 0.1815 (all data). [CCDC: 2299001](#)

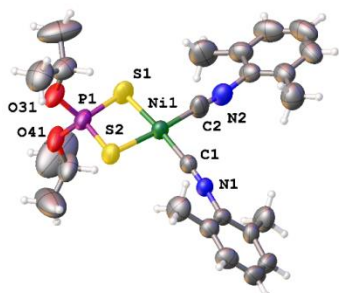

**Compound 4e:**  $C_{24}H_{32}N_2O_6PS_2ClNi$  ( $M=633.76$  g/mol): triclinic, space group P-1 (no. 2),  $a = 8.6853(3)$  Å,  $b = 11.9625(5)$  Å,  $c = 16.6919(6)$  Å,  $\alpha = 93.616(3)^\circ$ ,  $\beta = 98.940(3)^\circ$ ,  $\gamma = 103.585(3)^\circ$ ,  $V = 1656.28(11)$  Å<sup>3</sup>,  $Z = 2$ ,  $T = 293(2)$  K,  $\mu(\text{Mo K}\alpha) = 0.876$  mm<sup>-1</sup>,  $D_{\text{calc}} = 1.271$  g/cm<sup>3</sup>, 14723 reflections measured ( $4.516^\circ \leq 2\theta \leq 59.024^\circ$ ), 7756 unique ( $R_{\text{int}} = 0.0251$ ,  $R_{\text{sigma}} = 0.0522$ ) which were used in all calculations. The final  $R_1$  was 0.0654 ( $I > 2\sigma(I)$ ) and  $wR_2$  was 0.1977 (all data). [CCDC: 2299268](#)

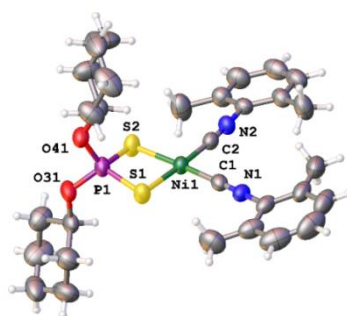

**Compound 4f:**  $C_{30}H_{40}N_2O_6PS_2ClNi$  ( $M=713.89$  g/mol): monoclinic, space group  $P2_1/c$  (no. 14),  $a = 17.7071(6)$  Å,  $b = 10.8206(4)$  Å,  $c = 21.3047(10)$  Å,  $\beta = 110.113(5)^\circ$ ,  $V = 3833.1(3)$  Å<sup>3</sup>,  $Z = 4$ ,  $T = 293(2)$  K,  $\mu(\text{Mo K}\alpha) = 0.765$  mm<sup>-1</sup>,  $D_{\text{calc}} = 1.237$  g/cm<sup>3</sup>, 19251 reflections measured ( $3.964^\circ \leq 2\theta \leq 58.944^\circ$ ), 9105 unique ( $R_{\text{int}} = 0.0371$ ,  $R_{\text{sigma}} = 0.0650$ ) which were used in all calculations. The final  $R_1$  was 0.0601 ( $I > 2\sigma(I)$ ) and  $wR_2$  was 0.1876 (all data). [CCDC: 2299269](#)

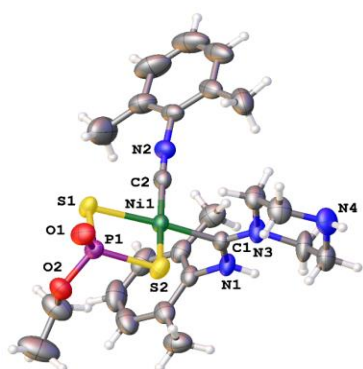

**Compound 5b:**  $C_{25}H_{32}N_4O_2PS_2Ni$  ( $M=574.34$  g/mol): monoclinic, space group  $P2_1/n$  (no. 14),  $a = 14.3103(5)$  Å,  $b = 15.1738(5)$  Å,  $c = 14.3126(5)$  Å,  $\beta = 100.034(3)^\circ$ ,  $V = 3060.32(19)$  Å<sup>3</sup>,  $Z = 4$ ,  $T = 293(2)$  K,  $\mu(\text{Mo K}\alpha) = 0.849$  mm<sup>-1</sup>,  $D_{\text{calc}} = 1.247$  g/cm<sup>3</sup>, 23465 reflections measured ( $4.43^\circ \leq 2\theta \leq 59.718^\circ$ ), 7625 unique ( $R_{\text{int}} = 0.0351$ ,  $R_{\text{sigma}} = 0.0439$ ) which were used in all calculations. The final  $R_1$  was 0.0384 ( $I > 2\sigma(I)$ ) and  $wR_2$  was 0.0976 (all data). [CCDC: 2299273](#)

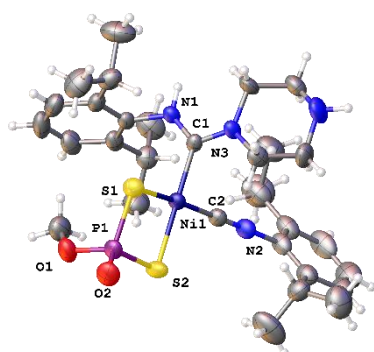

**Compound 5c:**  $C_{31}H_{47}N_4NiO_2PS_2$  ( $M=661.52$  g/mol): orthorhombic, space group  $Pbca$  (no. 61),  $a = 17.6491(10)$  Å,  $b = 21.2342(13)$  Å,  $c = 17.9976(8)$  Å,  $V = 6744.8(6)$  Å<sup>3</sup>,  $Z = 8$ ,  $T = 293(2)$  K,  $\mu(\text{Mo K}\alpha) = 0.780$  mm<sup>-1</sup>,  $D_{\text{calc}} = 1.303$  g/cm<sup>3</sup>, 25073 reflections measured ( $4.526^\circ \leq 2\theta \leq 59.478^\circ$ ), 8204 unique ( $R_{\text{int}} = 0.0905$ ,  $R_{\text{sigma}} = 0.1379$ ) which were used in all calculations. The final  $R_1$  was 0.0654 ( $I > 2\sigma(I)$ ) and  $wR_2$  was 0.1494 (all data). [CCDC: 2299274](#)

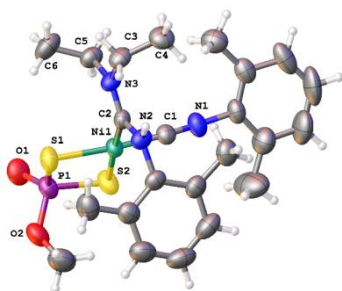

**Compound 5e:**  $C_{23}H_{32}N_3NiO_2PS_2$  ( $M = 536.31$  g/mol): monoclinic, space group  $P2_1/n$  (no. 14),  $a = 14.1712(3)$  Å,  $b = 14.4321(4)$  Å,  $c = 14.8981(3)$  Å,  $\beta = 100.956(2)^\circ$ ,  $V = 2991.42(12)$  Å<sup>3</sup>,  $Z = 4$ ,  $T = 293$  K,  $\mu(MoK\alpha) = 0.863$  mm<sup>-1</sup>,  $D_{calc} = 1.191$  g/cm<sup>3</sup>, 16554 reflections measured ( $4.066^\circ \leq 2\theta \leq 59.51^\circ$ ), 7189 unique ( $R_{int} = 0.0215$ ,  $R_{\sigma} = 0.0332$ ) which were used in all calculations. The final  $R_1$  was 0.0698 ( $I > 2\sigma(I)$ ) and  $wR_2$  was 0.2585 (all data). [CCDC: 2299270](#)

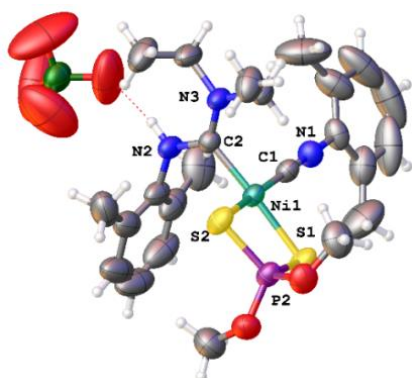

**Compound 6c:**  $C_{24}H_{35}ClN_3NiO_6PS_2$  ( $M = 650.80$  g/mol): monoclinic, space group  $P2_1/c$  (no. 14),  $a = 10.8986(2)$  Å,  $b = 15.6526(3)$  Å,  $c = 18.4304(3)$  Å,  $\beta = 96.3167(16)^\circ$ ,  $V = 3124.97(9)$  Å<sup>3</sup>,  $Z = 4$ ,  $T = 293(2)$  K,  $\mu(Mo K\alpha) = 0.931$  mm<sup>-1</sup>,  $D_{calc} = 1.383$  g/cm<sup>3</sup>, 13800 reflections measured ( $4.448^\circ \leq 2\theta \leq 57.516^\circ$ ), 7138 unique ( $R_{int} = 0.0234$ ,  $R_{\sigma} = 0.0413$ ) which were used in all calculations. The final  $R_1$  was 0.0503 ( $I > 2\sigma(I)$ ) and  $wR_2$  was 0.1517 (all data). [CCDC: 2299288](#)

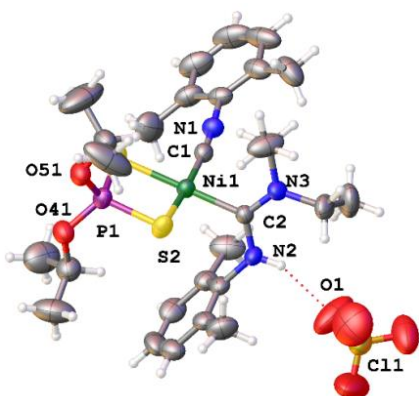

**Compound 6e:**  $C_{28}H_{43}ClN_3NiO_6PS_2$  ( $M = 706.90$  g/mol): monoclinic, space group  $P2_1/c$  (no. 14),  $a = 9.2715(2)$  Å,  $b = 21.9434(4)$  Å,  $c = 18.2332(4)$  Å,  $\beta = 104.038(3)^\circ$ ,  $V = 3598.71(15)$  Å<sup>3</sup>,  $Z = 4$ ,  $T = 293(2)$  K,  $\mu(Mo K\alpha) = 0.814$  mm<sup>-1</sup>,  $D_{calc} = 1.305$  g/cm<sup>3</sup>, 41217 reflections measured ( $4.368^\circ \leq 2\theta \leq 59.464^\circ$ ), 9086 unique ( $R_{int} = 0.0351$ ,  $R_{\sigma} = 0.0339$ ) which were used in all calculations. The final  $R_1$  was 0.0495 ( $I > 2\sigma(I)$ ) and  $wR_2$  was 0.1391 (all data).. [CCDC: 2299303](#)

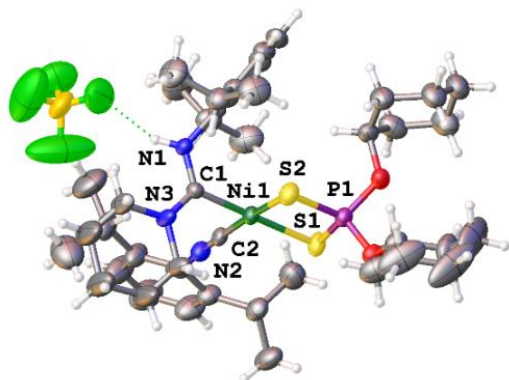

**Compound 6g:**  $C_{43}H_{67}BF_4N_3NiO_2PS_2$  ( $M = 898.60$  g/mol): triclinic, space group  $P-1$  (no. 2),  $a = 9.1019(4)$  Å,  $b = 14.9066(6)$  Å,  $c = 17.7025(10)$  Å,  $\alpha = 82.659(4)^\circ$ ,  $\beta = 89.705(4)^\circ$ ,  $\gamma = 86.302(4)^\circ$ ,  $V = 2377.2(2)$  Å<sup>3</sup>,  $Z = 2$ ,  $T = 293(2)$  K,  $\mu(Mo K\alpha) = 0.582$  mm<sup>-1</sup>,  $D_{calc} = 1.255$  g/cm<sup>3</sup>, 18610 reflections measured ( $4.484^\circ \leq 2\theta \leq 59.212^\circ$ ), 11088 unique ( $R_{int} = 0.0303$ ,  $R_{\sigma} = 0.0664$ ) which were used in all calculations. The final  $R_1$  was 0.0678 ( $I > 2\sigma(I)$ ) and  $wR_2$  was 0.2042 (all data). [CCDC: 2299286](#)

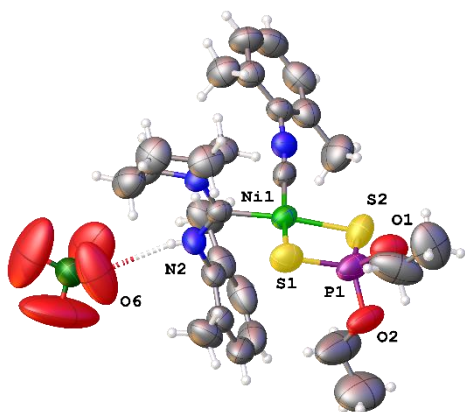

**Compound 6h:**  $C_{27}H_{39}ClN_3NiO_6PS_2$  ( $M = 690.86$  g/mol): monoclinic, space group  $P2_1/c$  (no. 14),  $a = 12.5858(5)$  Å,  $b = 19.6057(7)$  Å,  $c = 14.6622(5)$  Å,  $\beta = 112.736(4)^\circ$ ,  $V = 3336.8(2)$  Å<sup>3</sup>,  $Z = 4$ ,  $T = 293(2)$  K,  $\mu(\text{Mo K}\alpha) = 0.876$  mm<sup>-1</sup>,  $D_{\text{calc}} = 1.375$  g/cm<sup>3</sup>, 17174 reflections measured ( $6.806^\circ \leq 2\theta \leq 59.354^\circ$ ), 7904 unique ( $R_{\text{int}} = 0.0295$ ,  $R_{\text{sigma}} = 0.0484$ ) which were used in all calculations. The final  $R_1$  was 0.0766 ( $I > 2\sigma(I)$ ) and  $wR_2$  was 0.2393 (all data). [CCDC: 2299289](#)

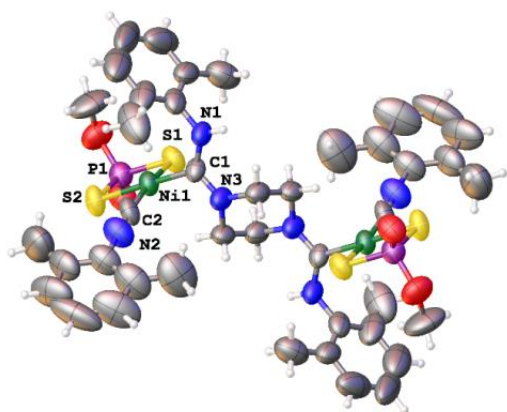

**Compound 7:**  $C_{42}H_{52}N_6Ni_2O_4P_2S_4$  ( $M = 1060.53$  g/mol): monoclinic, space group  $I2/a$  (no. 15),  $a = 15.8519(11)$  Å,  $b = 12.9097(15)$  Å,  $c = 25.918(2)$  Å,  $\beta = 102.398(8)^\circ$ ,  $V = 5180.2(8)$  Å<sup>3</sup>,  $Z = 4$ ,  $T = 293(2)$  K,  $\mu(\text{Mo K}\alpha) = 0.996$  mm<sup>-1</sup>,  $D_{\text{calc}} = 1.360$  g/cm<sup>3</sup>, 11394 reflections measured ( $4.108^\circ \leq 2\theta \leq 49.472^\circ$ ), 4420 unique ( $R_{\text{int}} = 0.0762$ ,  $R_{\text{sigma}} = 0.1059$ ) which were used in all calculations. The final  $R_1$  was 0.0717 ( $I > 2\sigma(I)$ ) and  $wR_2$  was 0.2072 (all data). [CCDC: 2299483](#)

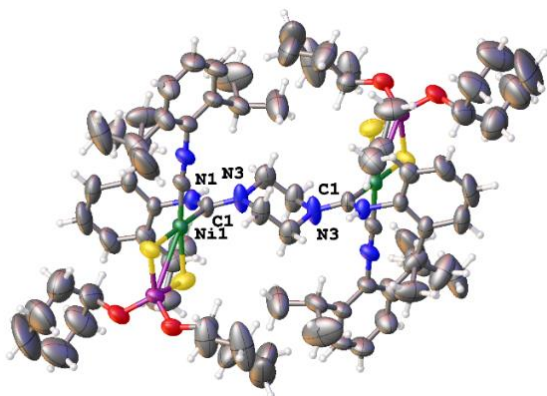

**Compound 8:**  $C_{80}H_{122}B_2F_8N_6Ni_2O_4P_2S_4$  ( $M = 1713.05$  g/mol): triclinic, space group  $P-1$  (no. 2),  $a = 13.0354(7)$  Å,  $b = 13.3201(7)$  Å,  $c = 14.2399(5)$  Å,  $\alpha = 90.782(4)^\circ$ ,  $\beta = 106.703(4)^\circ$ ,  $\gamma = 96.437(5)^\circ$ ,  $V = 2350.5(2)$  Å<sup>3</sup>,  $Z = 1$ ,  $T = 293(2)$  K,  $\mu(\text{Mo K}\alpha) = 0.585$  mm<sup>-1</sup>,  $D_{\text{calc}} = 1.210$  g/cm<sup>3</sup>, 22453 reflections measured ( $4.188^\circ \leq 2\theta \leq 59.13^\circ$ ), 11134 unique ( $R_{\text{int}} = 0.0386$ ,  $R_{\text{sigma}} = 0.0682$ ) which were used in all calculations. The final  $R_1$  was 0.0939 ( $I > 2\sigma(I)$ ) and  $wR_2$  was 0.3134 (all data). [CCDC: 2300163](#)

<sup>1</sup> Coldbery, D. E.; Fernelius, W. C.; Shamma, M.; Dwyer, F. P.; Hogarth, J. W.; Reid, I. K., Chromium(III) O,O'-Diethyl Dithiophosphate. In *Inorg. Synth.*, **1960**, 142-143.

<sup>2</sup> Boillos, E.; Miguel, D., Alkyl Transfer Reactivity in the First Octahedral Isocyanide Complex of Nickel(II). *Organometallics* **2004**, *23* (11), 2568-2572.

<sup>3</sup> Paasivirta, J.; Simanainen, J.; Vesterinen, R.; Virkki, L., Three nuclei n.m.r. spectroscopy of dimethoate compounds. A large solvent effect on the <sup>31</sup>P-S-C-<sup>1</sup>H vicinal coupling. *Organic Magnetic Resonance* **1977**, *9* (12), 708-711.
